1

2 **Spatial and temporal clustering of anti-SARS-CoV-2 antibodies in**  
3 **Illinois household cats, 2021- 2023**

4 Chi Chen<sup>1</sup>, Mathias Martins<sup>2</sup>, Dipankar Yettapu<sup>1</sup>, Diego G. Diel<sup>2</sup>, Jennifer M.  
5 Reinhart<sup>3</sup>, Ashlee Urbasic<sup>4</sup>, Hannah Robinson<sup>4</sup>, Csaba Varga<sup>1,5\*</sup>, Ying Fang<sup>1,5\*</sup>

6

7

8 <sup>1</sup>Department of Pathobiology, College of Veterinary Medicine, University of Illinois  
9 at Urbana-Champaign, Urbana, Illinois, USA

10

11

12 <sup>2</sup>Department of Population Medicine and Diagnostic Sciences, College of Veterinary  
13 Medicine, Cornell University, Ithaca, New York, USA

14

15

16 <sup>3</sup>Department of Veterinary Clinical Medicine, College of Veterinary Medicine,  
17 University of Illinois at Urbana-Champaign, Urbana, Illinois, USA

18

19

20 <sup>4</sup>Veterinary Diagnostic Laboratory at Veterinary Specialty Center, University of  
21 Illinois at Urbana-Champaign, Buffalo Grove, Illinois, USA

22

23

24 <sup>5</sup>Carl R. Woese Institute for Genomic Biology, University of Illinois at Urbana-  
25 Champaign, Urbana, Illinois, USA

26

27

28 \* To whom correspondence should be addressed:

29 [cvarga@illinois.edu](mailto:cvarga@illinois.edu) (Csaba Varga) and [yingf@illinois.edu](mailto:yingf@illinois.edu) (Ying Fang)

30

31 **Running title:** Spatial-temporal clustering of SARS-CoV-2 antibodies in Illinois household

32 cats

33

34 **Keywords:** Domestic cats, SARS-CoV-2, seroprevalence, spatial clustering, space-

35 time clusters

36

---

37 **ABSTRACT**

38 In this study, we evaluated the seroprevalence of SARS-CoV-2 antibodies in Illinois  
39 household cats from October 2021 to May 2023. Among 1,715 samples tested by  
40 serological assays, 244 samples (14%) tested positive. High-rate temporal, spatial, and  
41 space-time clusters of SARS-CoV-2 cases were assessed within 63 counties in Illinois.  
42 Three space-time clusters with higher than expected seroprevalence rates were  
43 identified in the northeastern, central-east, and southwest regions of Illinois, occurring  
44 between June and October 2022. Young cats had a higher rate of seropositivity  
45 compared to older cats, and the third quarter of the year had the highest seropositivity  
46 rate. This study provides an in-depth analysis of SARS-CoV-2 epidemiology in  
47 Illinois household cats, which will aid in COVID-19 control and prevention.

48

49 **Article summary line:** SARS-CoV-2 antibody seroprevalence was assessed in  
50 Illinois domestic cats, in which a higher seropositivity rate was clustered in the  
51 northern, central, and southern Illinois regions with peak periods occurring between  
52 June and October 2022.

53

---

54 **INTRODUCTION**

55 Severe acute respiratory syndrome coronavirus 2 (SARS-CoV-2), the causative  
56 agent of Coronavirus Disease 2019 (COVID-19), is a novel virus that emerged in late  
57 2019 in Wuhan, China (1-3). It belongs to the family *Coronaviridae* within the order  
58 *Nidovirales*, which is a group of positive-stranded RNA viruses possessing unique  
59 characteristics (4, 5). SARS-CoV-2 has a broad host range and is the seventh  
60 coronavirus that could infect humans (6-8). SARS-CoV-2 gains entry into host cells  
61 by binding to the angiotensin-converting enzyme 2 (ACE2) receptor through its spike  
62 (S) protein. ACE2 receptors in some animals are similar to those in humans, leading  
63 to increased susceptibility to the virus (9). The reported infected animals include cats,  
64 dogs, deer, mink, hamsters, etc. (10-14).

65 SARS-CoV-2 has been reported to be transmitted from humans to animals  
66 including cats, minks, and hamsters (15-18). Such transmission events raise concerns  
67 about potential reservoirs in animal populations, which could lead to further spillover  
68 events and threats to public health. Recent serological surveillance in cats reported a  
69 seropositivity range of 15% in China, 1% in Germany, and 5% in Portugal (19-21).  
70 The prevalence of SARS-CoV-2 in domestic household cats has not been well-defined  
71 in the United States of America.

72 In this study, we investigated the seroprevalence of SARS-CoV-2 antibodies in  
73 domestic cats in Illinois from October 2021 to May 2023. Spatial, temporal, and  
74 space-time scan statistical models were used to identify clusters of higher-than-

75 expected antibody-positive cats. A logistic regression model was constructed to  
76 evaluate the impact of age and season on the odds of SARS-CoV-2 seroprevalence in  
77 domestic cats. The prevalence, temporality, and space-time clustering of SARS-CoV-2  
78 infection in household cats in Illinois could guide future COVID-19 prevention and  
79 control programs.

## 80 **METHODS**

### 81 **Data sources**

82 The study period extended from February 2021 to May 2023, which included  
83 1715 serum samples from household cats in 63 counties across Illinois. All data were  
84 completely anonymized, with identifiers such as names and addresses removed, and  
85 unique IDs assigned to the cat populations to maintain confidentiality.

### 86 **Study setting**

87 The research centered on Illinois [Degrees, Minutes, Seconds (DMS) 40° 0' 0" N,  
88 89° 0' 0" W], a state situated in the Midwest of the United States, with its most  
89 populous city, Chicago, positioned on Lake Michigan's southwestern coast (**Fig 1**).

### 90 **Serological tests**

91 A blocking enzyme-linked immunosorbent assay (bELISA) for detecting SARS-  
92 CoV-2 specific antibody response was developed and validated in-house. The detailed  
93 method was described in our previous publication (22, 23). All the serum samples  
94 collected from the cats were initially screened by bELISA. The samples with positive  
95 bELISA results were subsequently confirmed by virus-neutralizing assay and Lumit™

---

96 Dx SARS-CoV-2 Immunoassay to confirm the positive status. The detailed method  
97 for the virus-neutralizing assay was described previously (10), in which SARS-CoV-2  
98 variant D614G and Omicron were used to test the neutralizing ability of the serum  
99 antibody. Lumit™ Dx SARS-CoV-2 Immunoassay is a commercial assay (Promega,  
100 Madison, Wisconsin). The lumit assay was conducted following the manufacturer's  
101 instructions.

### 102 **Logistic regression analysis**

103 To assess the impact of the age of cats on the seroprevalence of SARS-CoV-2  
104 antibodies, a logistic regression model was constructed. The predictor variable was  
105 represented by the age of cats in months while the outcome variable signified whether  
106 the SARS-CoV-2 antibody was detected or not. For the outcome, an odds ratio (OR),  
107 95% confidence intervals, and p-value were calculated. An OR of  $< 1$  indicated that  
108 the probability of SARS-CoV-2 antibody positivity decreased with an increase in age,  
109 and if the  $OR > 1$  then the probability of positivity increased with an increase in age.  
110 To interpret the results, marginal effects for a series of age intervals were calculated  
111 and illustrated in a figure.

### 112 **Spatial Analysis**

113 All maps for this study were built using ArcGIS Pro version 3.0.3  
114 (Environmental Systems Research Institute, Inc. (ESRI), Redlands, CA, USA).

115 The analysis was carried out at the county level, a well-defined geographical area  
116 used for administrative and statistical purposes in the United States (**Fig 1**). For all

117 spatial analysis, NAD 1983 UTM Zone 16N was used as projection.

118 For the spatial statistical analysis, the spatial scale was represented by the  
119 counties' centroids, and to each centroid, a value representing the seroprevalence in a  
120 county (number of positive samples divided by the total samples tested) was linked.  
121 Euclidean distance bands were used to measure distances from each county centroid  
122 to the neighboring county centroids.

### 123 **Disease mapping**

124 A point map was constructed to illustrate the distribution of the county-level  
125 seroprevalence of SARS-CoV-2 antibodies in Illinois household cats, using Natural  
126 Jenks classification to define the intervals (24).

127 Spatial interpolation of the seroprevalence of SARS-CoV-2 antibodies in Illinois  
128 domestic cats was performed using the Empirical Bayesian Kriging method, which  
129 applied a restricted maximum likelihood estimation and constructed several  
130 semivariograms to account for the error when estimating the semivariogram (25). The  
131 result of the spatial interpolation was illustrated in an isopleth map.

### 132 **Global spatial cluster analysis**

133 The Incremental Spatial Autocorrelation (Global Moran's I) Tool was used to  
134 evaluate the global clustering of seroprevalence of SARS-CoV-2 antibodies by  
135 assessing a series of incrementally increasing distances and examining the strength of  
136 global spatial clustering at each distance (26).

137 The starting distance was at which each location had at least one neighbor. For

---

138 each distance, a Moran's I Index value and a z-score and p-value were calculated to  
139 test the null hypothesis of spatial randomness. The zone of indifference parameter for  
140 the conceptualization of spatial relationships was used for the local and global spatial  
141 cluster analysis (26). The distance band with the highest global clustering (highest  
142 Moran's I Index) was selected for the local spatial cluster analysis.

### 143 **Local Spatial Cluster Analysis**

144 The Getis-Ord  $G_i^*$  statistic (27) was used to identify county-level statistically  
145 significant hot spots and cold spots. Hot spots signified counties with a high  
146 seroprevalence of SARS-CoV-2 antibodies surrounded by counties with high  
147 seroprevalence; whereas cold spots indicated counties with low seroprevalence  
148 surrounded by counties with low seroprevalence.

### 149 **Temporal, spatial, and space-time scan statistic**

150 A retrospective, temporal, spatial, and space-time scan statistic was utilized to  
151 identify locations and periods with higher-than-expected seroprevalence of SARS-  
152 CoV-2 antibodies using SaTScan software version 9.6 (28).

153 The smallest spatial scale was represented by the centroid of a county while the  
154 time unit was represented by the month and year of SARS-CoV-2 antibody testing.  
155 Because the data consisted of two possible outcomes, SARS-CoV-2 antibody positive  
156 and negative, a Bernoulli model (29) was used to estimate the relative risk and log-  
157 likelihood ratio. A circular scanning window for spatial (30) and a cylinder with a



---

158 circular spatial base and height relating to time for space-time (31) were used to  
159 identify clusters with higher-than-expected SARS-CoV-2 antibodies. The scanning  
160 window was set to include 50% of the population and/or 50% of the time at risk. A  
161 simulated p-value of  $\leq 0.05$  after 999 replications using a Monte Carlo simulation  
162 identified significant clusters. Relative risks of counties included within the  
163 significant space and space-time clusters were calculated and illustrated in maps to  
164 avoid the assumption that the relative risk of seroprevalence is identical throughout a  
165 significant cluster.

## 166 **RESULTS**

### 167 **Seroprevalence and distribution of seropositivity of cats across seasons, genders,** 168 **ages, and breeds**

169 From October 2021 to May 2023, a total of 1715 household cat serums from 63  
170 counties in Illinois were tested for SARS-CoV-2 specific antibodies using bELISA.  
171 The result showed that 244 (14% of 1715) cats were detected as having specific  
172 antibodies against SARS-CoV-2 (**Table S1**). The results of those 244 positive samples  
173 were further confirmed in Lumit™ Dx SARS-CoV-2 Immunoassay and virus  
174 neutralizing test.

175 The distribution of seropositivity of cats across season, gender, age, and breed is  
176 presented in **Table 1**. Kittens (< 1-year-old) were 29.63% positive, followed by Junior  
177 (1-2 years old), 22.22% positive, Adults (3-6 years old) 18.12% positive, Seniors (10–

---

178 19 years old), 15.36% positive, and Geriatric (>15 years old), 11.5% have the lowest  
179 rate of test positivity. Winter, 2021 had the lowest positive rate (n=17, 6.85% of 248)  
180 among all seasons.

181 We further performed case-case multivariable logistic regression analysis. The  
182 predicted marginal effects of the age and season impact on the probability of SARS-  
183 CoV2 antibodies presence in domestic cats are illustrated in **Figure 2**. The results  
184 showed that young cats had a higher probability of SARS-CoV-2 infection (OR=  
185 0.996; p=0.001) as the odds of seropositivity decreased when the age of cats increased.  
186 In addition, the third quarter of the year (OR=3.15; p<0.001) compared to the first  
187 quarter had the highest odds of a cat being seropositive. No significant associations  
188 were detected with breeds and sexes.

### 189 **Disease mapping**

190 We further analyzed the distribution of SARS-CoV-2 seroprevalence in domestic  
191 cats across Illinois counties. The county-level seroprevalence ranged from 0 to 100%  
192 (**Fig 3A**). The highest seroprevalence level was in DeKalb, Grundy, Kendall, and  
193 White counties, with a 100% positive ratio. The lowest seroprevalence level was  
194 observed in 21 counties, including DeWitt, Woodford, Effingham, Wayne, and others,  
195 with a 0% positive ratio. In terms of the total number of tests among counties (**Table**  
196 **S1**), Champaign had the highest number of tests (n=659), followed by Cook (n=190),  
197 McLean (n=100), Sangamon (n=74), and Macon (n=62).

198 **Figure 3B** illustrates the spatial interpolation of the seroprevalence of SARS-

---

199 CoV-2 antibodies in Illinois domestic cats using Empirical Bayesian Kriging analysis.

200 Several regions in Illinois showed an increased seroprevalence, including northern

201 and southern Illinois, with values ranging from 36.98 to 44.02.

## 202 **Global and local spatial cluster analysis**

203 To determine the extent of clustering of high SARS-CoV2 antibodies in domestic

204 cats across Illinois, global spatial clustering was assessed by using the Incremental

205 Spatial Autocorrelation (Global Moran's I) Tool. As shown in **Figure 4**, one peak

206 (corresponding to the maximum Z-score) was identified at 80.7 km. The high global

207 clustering range suggests a widespread distribution of SARS-CoV2 antibodies in

208 domestic cats across Illinois counties. This distance band and the "zone of

209 indifference" conceptualization parameter were used for the local spatial cluster

210 analysis to determine the global clustering of SARS-CoV2 antibodies (high and low

211 seroprevalence regions). The Hot Spot (Getis-Ord  $G_i^*$ ) analysis identified 9 counties

212 in northern Illinois with high seroprevalence (hot spots), including LaSalle, Kendall,

213 Grundy, and Kankakee (P-value=0.01), DuPage and Cook (P-value=0.05), DeKalb,

214 Kane, and Will (P-value=0.10) (**Fig 5**). In addition, in southern Illinois, Williamson

215 County was also identified as a hot spot (P-value=0.10). A large cold spot (counties

216 with low seroprevalence surrounded by counties with low seroprevalence) was

217 identified in central Illinois that included 7 counties (Logan, De Witt, Macon,

218 Christian, Shelby, Moultrie, and Effingham County, P-value=0.10).

## 219 **Temporal, spatial, and space-time scan statistic analysis**

---

220 The results of the temporal, spatial, and space-time scan statistics are presented  
221 in **Table 2**. A single temporal cluster was identified between June and November 2022,  
222 where cats showed higher-than-expected seropositivity for SARS-CoV-2 antibodies.  
223 Two spatial clusters ( $p < 0.05$ ) where cats revealed a higher-than-expected -  
224 seroprevalence were detected by using the discrete Bernoulli model (**Fig 6A, Table 2**).  
225 The primary cluster (SP Cluster 1) was located in northeastern Illinois and included 3  
226 counties (Livingston, Ford, and Grundy) and contained 9 seropositive cases (60% of  
227 15). The second spatial cluster (SP Cluster 2) included 7 northern Illinois counties  
228 (Jackson, Perry, Williamson, Washington, Jefferson, Saline, and St. Clair), and  
229 contained 12 seropositive cases (42.9% of 28). The relative risk within the significant  
230 clusters ranged from 0 to 7.05.

231 The space-time analysis using the Bernoulli model identified three significant  
232 ( $p < 0.05$ ) clusters of cats with higher-than-expected SARS-CoV-2 antibodies (**Fig 6B,**  
233 **Table 2**). The primary cluster (ST Cluster 1) occurred between June 2022 and  
234 September 2022 in the northeastern part of Illinois (RR = 4.80) and contained 8  
235 counties (Kankakee, Will, Iroquois, Grundy, Livingston, Ford, Kendall, Cook). The  
236 second cluster (ST Cluster 2) occurred between July 2022 and October 2022 in the  
237 southern part of Illinois (RR = 2.10) and contained 5 counties (Washington, Clinton,  
238 Perry, Jefferson, St. Clair). The last cluster (ST Cluster 3) occurred between July 2022  
239 and October 2022 in the central-eastern part of Illinois (RR = 7.18) and contained 5  
240 counties (Edgar, Clark, Douglas, Coles, Vermilion, Cumberland, Champaign). The

---

241 relative risk within the significant space-time clusters ranged from 0 to 7.13.

242

243

244 **Comparing the seroprevalence of SARS-CoV-2 in cats with the SARS-CoV-2**  
245 **infections in humans at Illinois**

246 During the 2021-2023 period, the prevalence of SARS-CoV-2 infections in both  
247 humans and cats in Illinois, United States, exhibited notable trends. We assessed the  
248 potential correlation of SARS-CoV-2 seroprevalence in cats with that of human cases.  
249 As shown in the kinetic curve for time course monitoring of antibody response (**Fig 7**),  
250 the seroprevalence of SARS-CoV-2 antibody-positive cats reached several peaks, in  
251 December 2021, March 2022, April 2022, July 2022, September 2022, October 2022,  
252 January 2023, and March 2023. Compared to the reported SARS-CoV-2 positive  
253 human cases (nucleic acid-based test), the first SARS-CoV2 antibody prevalence peak  
254 in cats overlapped with the human SARS-CoV2 RNA-positive peak from December  
255 2021 to January 2022, while the second SARS-CoV2 antibody prevalence peak in  
256 cats appeared about one month after the human positive peak. For the rest of the  
257 period, no similarity was found between the positive rates of human and cat cases.

258 **DISCUSSION**

259 SARS-CoV-2 is known to infect humans and certain animal species. Studies  
260 have demonstrated that cats are highly susceptible to SARS-CoV-2 under both

---

261 experimental and natural infection conditions (32, 33). Given that domestic cats often  
262 live close to their human caretakers and have opportunities to interact with other  
263 animals, they may contribute to the ongoing evolution of SARS-CoV-2 (34).

264 We performed serological surveillance of SARS-CoV-2 antibody prevalence in  
265 Illinois domestic cats during 2021-2023. Initially, we used the bELISA to screen all  
266 the serum samples collected during the study period. For the bELISA positive samples,  
267 we used two serological assays (Promega Lumit™ Dx SARS-CoV-2 Immunoassay  
268 and virus neutralization assay) to confirm the results. Nine samples were showing  
269 inconsistent results, which were excluded from the subsequent analysis. The  
270 inconsistent results might be due to the different targets between different assays. Our  
271 bELISA is targeted for antibodies specific for viral nucleocapsid protein, while Lumit  
272 and virus neutralization assays are designed for testing antibodies response against  
273 viral spike protein. On the other hand, the sample quality and test sensitivity could  
274 affect the results. Two of the cat serum samples were hemolyzed, which may cause  
275 high background in bELISA test and generate false positive results. Nevertheless, we  
276 also performed the analysis with the inclusion of those 9 samples, the results did not  
277 change our conclusions.

278 To better understand the demographic characteristics of those cats having SARS-  
279 CoV-2 specific antibodies, we utilized a case-case multivariable logistic regression  
280 analysis to compare the odds of positivity considering seasonality, gender, and age  
281 factors. We found that the odds of a cat testing positive for SARS-CoV-2 antibodies

---

282 decreased as the age increased, with younger cats having the highest while older cats  
283 had the lowest seroprevalence, which is opposite to age-related human SARS-CoV2  
284 risks. In human cases, there is an age-related disparity in the prevalence and severity  
285 of SARS-CoV-2 infection, in which older people have a higher infection risk due to  
286 weaker immune systems. Our study showed the opposite tendency in cats. Young cats  
287 have an immature adaptive immune response (35), which may cause them more  
288 susceptible to infections. Future studies are needed to elucidate the in-depth  
289 mechanisms that cause the difference in seroprevalence among the age groups of cats.

290       To characterize the distribution of SARS-CoV-2 antibodies in Illinois cats, we  
291 applied a stepwise analysis that combined both spatial and conventional statistical  
292 methods with Geographic Information Systems (GIS). As the first step of spatial  
293 analysis, we constructed disease maps to visualize the geographic distribution of  
294 SARS-CoV-2 infections across Illinois's 63 counties. When evaluating the  
295 seroprevalence level, we calculated the proportion of positive samples collected from  
296 each county across Illinois. One limitation of our approach was that not all Illinois  
297 counties were included because from some counties we did not receive samples. To  
298 mitigate this issue, we constructed an isopleth map by spatially interpolating the  
299 seroprevalence using the empirical Bayesian Kriging method (36). The results  
300 identified areas with high seroprevalence levels of SARS-CoV-2 antibodies in Illinois  
301 household cats. However, we found that the distribution of seroprevalence was not  
302 even within different counties. In the northern and southern regions of Illinois, the

---

303 seroprevalence was higher than in other regions. The northern region contains LaSalle,  
304 Kendall, Grundy, Kankakee, DuPage, Cook, DeKalb, Kane, and Will counties. This  
305 region has the highest human population density in Illinois, which includes the city of  
306 Chicago in Cook County, and based on the size of its population, it has the highest  
307 estimated number of household cats in Illinois. The southern region in Illinois also  
308 displayed a high seroprevalence in both choropleth and isopleth maps. However, this  
309 region has a low population density and a low estimated number of cats, and fewer  
310 samples were collected from this region (Table S1), which might overestimate the  
311 seroprevalence.

312       The Incremental Spatial Autocorrelation (Global Moran's I) Tool was utilized to  
313 examine the global clustering of antibody seroprevalence over ten increasing distance  
314 bands. This evaluation of global spatial autocorrelation considered both county  
315 locations and their seroprevalence. The concept of “zone of indifference” was used for  
316 the analysis, which implies that all counties within a specific distance band receive the  
317 maximum weighting, and beyond this distance, the level of influence experiences a  
318 rapid decline in weighting as the distance increases (37, 38). The highest Moran's I  
319 Index value, z-score, and p-value were observed at a distance of 80 km, suggesting  
320 that SARS-CoV-2 infections were widespread in several areas across Illinois.

321       We used the Hot Spot Analysis (Getis-Ord  $G_i^*$ ) during the second stage of our  
322 spatial analysis. This method identifies areas with high seroprevalence (hot spots; a  
323 county with a high seroprevalence surrounded by counties with high seroprevalence)



---

324 and also detects areas with low seroprevalence (cold spots; a county with low  
325 seroprevalence surrounded by counties with low rates) (39). As presented in the  
326 hot/cold spot map, northern Illinois, including LaSalle, Kendall, Grundy, Kankakee,  
327 DuPage, Cook, DeKalb, Kane, and Will counties, and southern Illinois containing  
328 Williamson County were recognized as statistically significant hot spots, which is  
329 consistent with our previous disease mapping results. Similarly to our previous results,  
330 central Illinois was identified as a cold-spot area where cat samples submitted from  
331 these counties had a low seroprevalence. As a limitation of our analysis, some regions  
332 included counties with low tested sample volumes, and the calculated seroprevalences  
333 become unreliable and very high if several positive cases were detected in these  
334 regions (40).

335       At the third stage of our spatial analysis, we utilized temporal, spatial, and space-  
336 time scan statistics to add extra information on the location and time frame of the  
337 distribution of seroprevalence of SARS-CoV-2 positive antibodies in Illinois  
338 household cats. First, we employed a purely spatial scan statistic, which presumes that  
339 the seroprevalence follows a Bernoulli distribution (i.e., SARS-CoV-2 antibody  
340 detected in a cat in a county versus not detected). Two high seroprevalence spatial  
341 clusters were identified in the northeast region of Illinois, where 60% of the samples  
342 tested positive and southern region of Illinois, where 42.9% of the samples tested  
343 positive. These clusters overlapped with the area identified by the Hot Spot method.  
344 We also detected three high seroprevalence space-time clusters in the northeast,

345 central-east, and southern regions of Illinois. Space-time cluster 1 (ST 1), occurring  
346 between June 2022 and September 2022, and space-time cluster 2 (ST 2), occurring  
347 between June 2022 and September 2022 were overlapping with the clusters detected  
348 by the spatial scan and Hot Spot analysis, highlighting the importance of these areas.  
349 The third space-time cluster (ST 3), which occurred between July 2022 and October  
350 2022) was detected in the central-eastern Illinois region. These space-time clusters  
351 beside the locations provided a time component, suggesting that there were peaks in  
352 seroprevalence that occurred during these periods.

353       Interestingly, there was a reported SARS-CoV-2 human infection peak that  
354 occurred in Illinois during December 2021-January 2022. In our study period, we  
355 detected the first cat seropositive peak in late December 2021, while the second cat  
356 seropositive peak appeared about one month after the human positive peak. We  
357 suspected that there might be some possible transmissions between humans and cats  
358 during that period. Especially, the second seropositive peak could be related to human  
359 SARS-CoV-2 infections because about 14 days after being infected with SARS-CoV-  
360 2, the antibody level is detectable by our serological testing method (10, 22),  
361 suggesting a possible human-to-cat transmission. However, we did not find any  
362 similarity between the positive case rates of human infections and cat seropositivity  
363 for the rest of the study period (between March 2022 – May 2023). Future studies are  
364 warranted to follow up on this finding to assess the protentional transmission risk  
365 between humans and cats.

366           In conclusion, our analysis of SARS-CoV2 antibody seroprevalence in Illinois  
367 domestic cats during 2021-2023 identified northeast and southwest Illinois regions  
368 with increased seroprevalence of SARS-CoV-2 antibodies among domestic cats, and  
369 this increase occurred between June and October 2022. The susceptibility of the cats  
370 to SARS-CoV-2 infection appeared to be related to the age and the time of the year.  
371 This information can aid health stakeholders to develop effective prevention and  
372 control measures.

### 373 **ACKNOWLEDGMENTS**

374 We thank Dr. Tony Vanden Bush from Promega for providing the Lumit™ Dx SARS-  
375 CoV-2 Immunoassay kits. This project was supported by the National Institute of  
376 Health (Grant #R01A1166791, to Y. Fang and D. Diel).  
377 Chi Chen is a Ph.D. student at the University of Illinois Urbana-Champaign, USA.  
378 His research interests include SARS-CoV-2 detection and epidemiological  
379 surveillance in animals.

380

381

---

382 **Figure 1. Map highlighting the study area.** Illinois is located in the midwestern

383 United States, which contains 103 counties.

384 **Figure 2. Effects of age and season on the seroprevalence of SARS-CoV-2**

385 **antibody detection in household cats in Illinois, 2021-2023.** Predicted marginal

386 effects calculated from a multivariable logistic regression model. Seropositivity

387 (yes/no) of cat serum samples (n=1715) as the outcome variable, while age and

388 season as predictor variables were included in the model.

389 **Figure 3. SARS-CoV-2 antibodies in Illinois household cats during 2021-2023. (A)**

390 Point map illustrating the distribution of seroprevalence by county. **(B)** Isopleth map

391 illustrating the distribution of seroprevalence across Illinois by using the Empirical

392 Bayesian kriging spatial interpolation method.

393 **Figure 4. Incremental spatial autocorrelation analysis for the seroprevalence of**

394 **SARS-CoV-2 antibodies in Illinois domestic cats.** Results of the Global Moran's I

395 statistic. The default incremental distance was selected as the starting distance that

396 signifies the average distance to each county's nearest neighboring centroid. The color

397 of each point on the graph corresponds to the statistical significance of the z-score

398 values. The peak signal is the distance where the spatial processes influencing

399 clustering is most evident. The zone of indifference conceptualization parameter was

400 used for the analysis. Statistically significant at  $p \leq 0.05$ .

401

---

402 **Figure 5. Hot spot analysis of the seroprevalence of SARS-CoV-2 antibodies in**

403 **Illinois household cats.** The Getis-Ord  $G_i^*$  statistic was applied to identify local  
404 clusters. Hot spots (red color) signify counties with high seroprevalence surrounded  
405 by high seroprevalence counties, while cold spots (blue color) signify counties with  
406 low seroprevalence surrounded by counties with low seroprevalence. A Euclidean  
407 distance band of 80.7 km, and the zone of indifference conceptualization parameter,  
408 were used for the analysis. Statistically significant at  $p \leq 0.05$ .

409 **Figure 6. Spatial and space-time clustering of seroprevalence of SARS-CoV-2**

410 **antibodies in Illinois household cats during 2021-2023.** (A) Purely spatial clusters  
411 of SARS-CoV-2 antibodies in Illinois household cats. The relative risk (RR) of  
412 counties within a spatial cluster where cats had higher than expected SARS-CoV-2  
413 antibodies is shown. The circle represents the location of the cluster. Within the circle,  
414 the color of each dot represents the value range of the RR rate in each county.  
415 (B) Space-time clusters of SARS-CoV-2 antibodies in Illinois household cats.  
416 Retrospective analysis, scanning for clusters with high seroprevalence, using 50%  
417 population at risk and 50 % period scanning window, 999 Montecarlo permutation,  
418 and the Bernoulli model. The circle represents the location of the cluster, and the  
419 period of the cluster is also represented. Within the cluster, the color of each dot  
420 represents the value range of the RR in each county. Statistically significant at  
421  $p \leq 0.05$ .

---

422 **Figure 7. Prevalence rates of SARS-CoV-2 infections in humans and domestic**  
423 **cats in Illinois during 2021-2022.** The weekly seropositive rate of Illinois domestic  
424 cats is shown in the orange line, while the weekly viral nucleic acid test positive rate  
425 of reported human cases is shown in the blue line. Note, the peak of human cases  
426 during January of 2022, followed by a set of peaks of cat cases starting on February  
427 2022 and continuing for the rest of the study period.

---

428 **REFERENCE**

- 429 1. Lu R, Zhao X, Li J, Niu P, Yang B, Wu H, et al. Genomic characterisation  
430 and epidemiology of 2019 novel coronavirus: implications for virus origins and  
431 receptor binding. *Lancet*. 2020 Feb 22;395(10224):565-74.
- 432 2. Hu B, Guo H, Zhou P, Shi ZL. Characteristics of SARS-CoV-2 and COVID-  
433 19. *Nat Rev Microbiol*. 2021 Mar;19(3):141-54.
- 434 3. Jackson CB, Farzan M, Chen B, Choe H. Mechanisms of SARS-CoV-2 entry  
435 into cells. *Nat Rev Mol Cell Biol*. 2022 Jan;23(1):3-20.
- 436 4. Pal M, Berhanu G, Desalegn C, Kandi V. Severe Acute Respiratory  
437 Syndrome Coronavirus-2 (SARS-CoV-2): An Update. *Cureus*. 2020 Mar  
438 26;12(3):e7423.
- 439 5. Britton P. Coronaviruses: General Features (Coronaviridae). In: Bamford DH,  
440 Zuckerman M, editors. *Encyclopedia of Virology (Fourth Edition)*. Oxford: Academic  
441 Press; 2019. p. 193-7.
- 442 6. Wu L, Chen Q, Liu K, Wang J, Han P, Zhang Y, et al. Broad host range of  
443 SARS-CoV-2 and the molecular basis for SARS-CoV-2 binding to cat ACE2. *Cell*  
444 *Discovery*. 2020 2020/09/29;6(1):68.
- 445 7. Zhou P, Yang XL, Wang XG, Hu B, Zhang L, Zhang W, et al. A pneumonia  
446 outbreak associated with a new coronavirus of probable bat origin. *Nature*. 2020  
447 Mar;579(7798):270-3.
- 448 8. Zhu N, Zhang DY, Wang WL, Li XW, Yang B, Song JD, et al. A Novel  
449 Coronavirus from Patients with Pneumonia in China, 2019. *New Engl J Med*. 2020  
450 Feb 20;382(8):727-33.
- 451 9. Soté WO, Franca EF, Hora AS, Comar M. A computational study of the  
452 interface interaction between SARS-CoV-2 RBD and ACE2 from human, cat, dog,  
453 and ferret. *Transbound Emerg Dis*. 2022;69(4):2287-95.
- 454 10. Martins M, do Nascimento GM, Nooruzzaman M, Yuan F, Chen C, Caserta  
455 LC, et al. The Omicron Variant BA.1.1 Presents a Lower Pathogenicity than B.1  
456 D614G and Delta Variants in a Feline Model of SARS-CoV-2 Infection. *J Virol*. 2022  
457 Sep 14;96(17):e0096122.
- 458 11. Sit THC, Brackman CJ, Ip SM, Tam KWS, Law PYT, To EMW, et al.  
459 Infection of dogs with SARS-CoV-2. *Nature*. 2020 Oct;586(7831):776-8.
- 460 12. Hale VL, Dennis PM, McBride DS, Nolting JM, Madden C, Huey D, et al.  
461 SARS-CoV-2 infection in free-ranging white-tailed deer. *Nature*. 2022  
462 Feb;602(7897):481-6.
- 463 13. Sharun K, Dhama K, Pawde AM, Gortázar C, Tiwari R, Bonilla-Aldana DK,  
464 et al. SARS-CoV-2 in animals: potential for unknown reservoir hosts and public  
465 health implications. *Vet Q*. 2021 Dec;41(1):181-201.
- 466 14. Halfmann PJ, Iida S, Iwatsuki-Horimoto K, Maemura T, Kiso M, Scheaffer  
467 SM, et al. SARS-CoV-2 Omicron virus causes attenuated disease in mice and

- 
- 468 hamsters. *Nature*. 2022 Mar;603(7902):687-92.
- 469 15. Sila T, Sunghan J, Laochareonsuk W, Surasombatpattana S, Kongkamol C,  
470 Ingviya T, et al. Suspected Cat-to-Human Transmission of SARS-CoV-2, Thailand,  
471 July-September 2021. *Emerg Infect Dis*. 2022 Jul;28(7):1485-8.
- 472 16. Oude Munnink BB, Sikkema RS, Nieuwenhuijse DF, Molenaar RJ, Munger  
473 E, Molenkamp R, et al. Transmission of SARS-CoV-2 on mink farms between  
474 humans and mink and back to humans. *Science*. 2021 Jan 8;371(6525):172-7.
- 475 17. Yen HL, Sit THC, Brackman CJ, Chuk SSY, Gu H, Tam KWS, et al.  
476 Transmission of SARS-CoV-2 delta variant (AY.127) from pet hamsters to humans,  
477 leading to onward human-to-human transmission: a case study. *Lancet*. 2022 Mar  
478 12;399(10329):1070-8.
- 479 18. Hedman HD, Krawczyk E, Helmy YA, Zhang L, Varga C. Host Diversity and  
480 Potential Transmission Pathways of SARS-CoV-2 at the Human-Animal Interface.  
481 *Pathogens (Basel, Switzerland)*. 2021;10(2).
- 482 19. Zhang Q, Zhang H, Gao J, Huang K, Yang Y, Hui X, et al. A serological  
483 survey of SARS-CoV-2 in cat in Wuhan. *Emerging Microbes & Infections*.  
484 2020;9(1):2013-9.
- 485 20. Michelitsch A, Hoffmann D, Wernike K, Beer M. Occurrence of Antibodies  
486 against SARS-CoV-2 in the Domestic Cat Population of Germany. *Vaccines (Basel)*.  
487 2020;8(4).
- 488 21. Oliveira A, Pereira MA, Mateus TL, Mesquita JR, Vala H. Seroprevalence of  
489 SARS-CoV-2 in Client-Owned Cats from Portugal. *Vet Sci*. 2022;9(7).
- 490 22. Yuan F, Chen C, Covalada LM, Martins M, Reinhart JM, Sullivan DR, et al.  
491 Development of monoclonal antibody-based blocking ELISA for detecting SARS-  
492 CoV-2 exposure in animals. *bioRxiv*. 2023:2023.03. 11.532204.
- 493 23. Yuan F, Chen C, Covalada LM, Martins M, Reinhart JM, Sullivan DR, et al.  
494 Development of monoclonal antibody-based blocking ELISA for detecting SARS-  
495 CoV-2 exposure in animals. *mSphere*. 2023;. Inpress.
- 496 24. Jenks GF, Caspall FC. Error on Choroplethic Maps: Definition, Measurement,  
497 Reduction. *Annals of the Association of American Geographers*. 1971  
498 1971/06/01;61(2):217-44.
- 499 25. Krivoruchko K. Empirical bayesian kriging. *ArcUser Fall*. 2012;6(10):1145.
- 500 26. Grekousis G. *Spatial Analysis Methods and Practice: Describe – Explore –*  
501 *Explain through GIS*. Cambridge: Cambridge University Press; 2020.
- 502 27. Getis A, Ord JK. The Analysis of Spatial Association by Use of Distance  
503 Statistics. In: Anselin L, Rey SJ, editors. *Perspectives on Spatial Data Analysis*. Berlin,  
504 Heidelberg: Springer Berlin Heidelberg; 2010. p. 127-45.
- 505 28. Kulldorff M. *SaTScan User Guide*; 2018. Reference Source. 2022.
- 506 29. Kulldorff M, Nagarwalla N. Spatial disease clusters: detection and inference.  
507 *Stat Med*. 1995 Apr 30;14(8):799-810.
- 508 30. Kulldorff M. A spatial scan statistic. *Communications in Statistics-Theory*



- 
- 509 and methods. 1997;26(6):1481-96.
- 510 31. Kulldorff M, Athas WF, Feurer EJ, Miller BA, Key CR. Evaluating cluster  
511 alarms: a space-time scan statistic and brain cancer in Los Alamos, New Mexico. *Am*  
512 *J Public Health*. 1998 Sep;88(9):1377-80.
- 513 32. Gaudreault NN, Trujillo JD, Carossino M, Meekins DA, Morozov I, Madden  
514 DW, et al. SARS-CoV-2 infection, disease and transmission in domestic cats.  
515 *Emerging Microbes & Infections*. 2020 2020/01/01;9(1):2322-32.
- 516 33. Izes AM, Yu J, Norris JM, Govendir M. Current status on treatment options  
517 for feline infectious peritonitis and SARS-CoV-2 positive cats. *The Veterinary*  
518 *Quarterly*. 2020;40(1):322-30.
- 519 34. El-Tholoth M, Hussein M, Mohammed D, Al-Rasheedi M, Al-Qubaisi H, Al-  
520 Blooshi A, et al. Serological Investigation on the Presence of Feline Coronavirus  
521 (FCoV) and Severe Acute Respiratory Syndrome Coronavirus 2 (SARS-CoV-2) in  
522 Domestic Cats Living with COVID-19 Positive Owners in the UAE, 2022. *Animals*.  
523 2023;13(3):493.
- 524 35. VIII - IMMUNOLOGY OF THE CAT. In: Pastoret P-P, Griebel P, Bazin H,  
525 Govaerts A, editors. *Handbook of Vertebrate Immunology*. San Diego: Academic  
526 Press; 1998. p. 289-335.
- 527 36. Yudhanto S, Varga C. Knowledge and Attitudes of Small Animal  
528 Veterinarians on Antimicrobial Use Practices Impacting the Selection of  
529 Antimicrobial Resistance in Dogs and Cats in Illinois, United States: A Spatial  
530 Epidemiological Approach. *Antibiotics*. 2023;12(3):542.
- 531 37. Anselin L. Local indicators of spatial association—LISA. *Geographical*  
532 *analysis*. 1995;27(2):93-115.
- 533 38. Mitchel A. *The ESRI Guide to GIS analysis, Volume 2: Spartial*  
534 *measurements and statistics*: ESRI press; 2005.
- 535 39. Varga C, John P, Cooke M, Majowicz SE. Spatial and space-time clustering  
536 and demographic characteristics of human nontyphoidal *Salmonella* infections with  
537 major serotypes in Toronto, Canada. *PLOS ONE*. 2020;15(7):e0235291.
- 538 40. Varga C, Pearl DL, McEwen SA, Sargeant JM, Pollari F, Guerin MT. Area-  
539 level global and local clustering of human *Salmonella* Enteritidis infection rates in the  
540 city of Toronto, Canada, 2007-2009. *BMC Infect Dis*. 2015;15:359.

541



# Counties in Illinois, United States of America

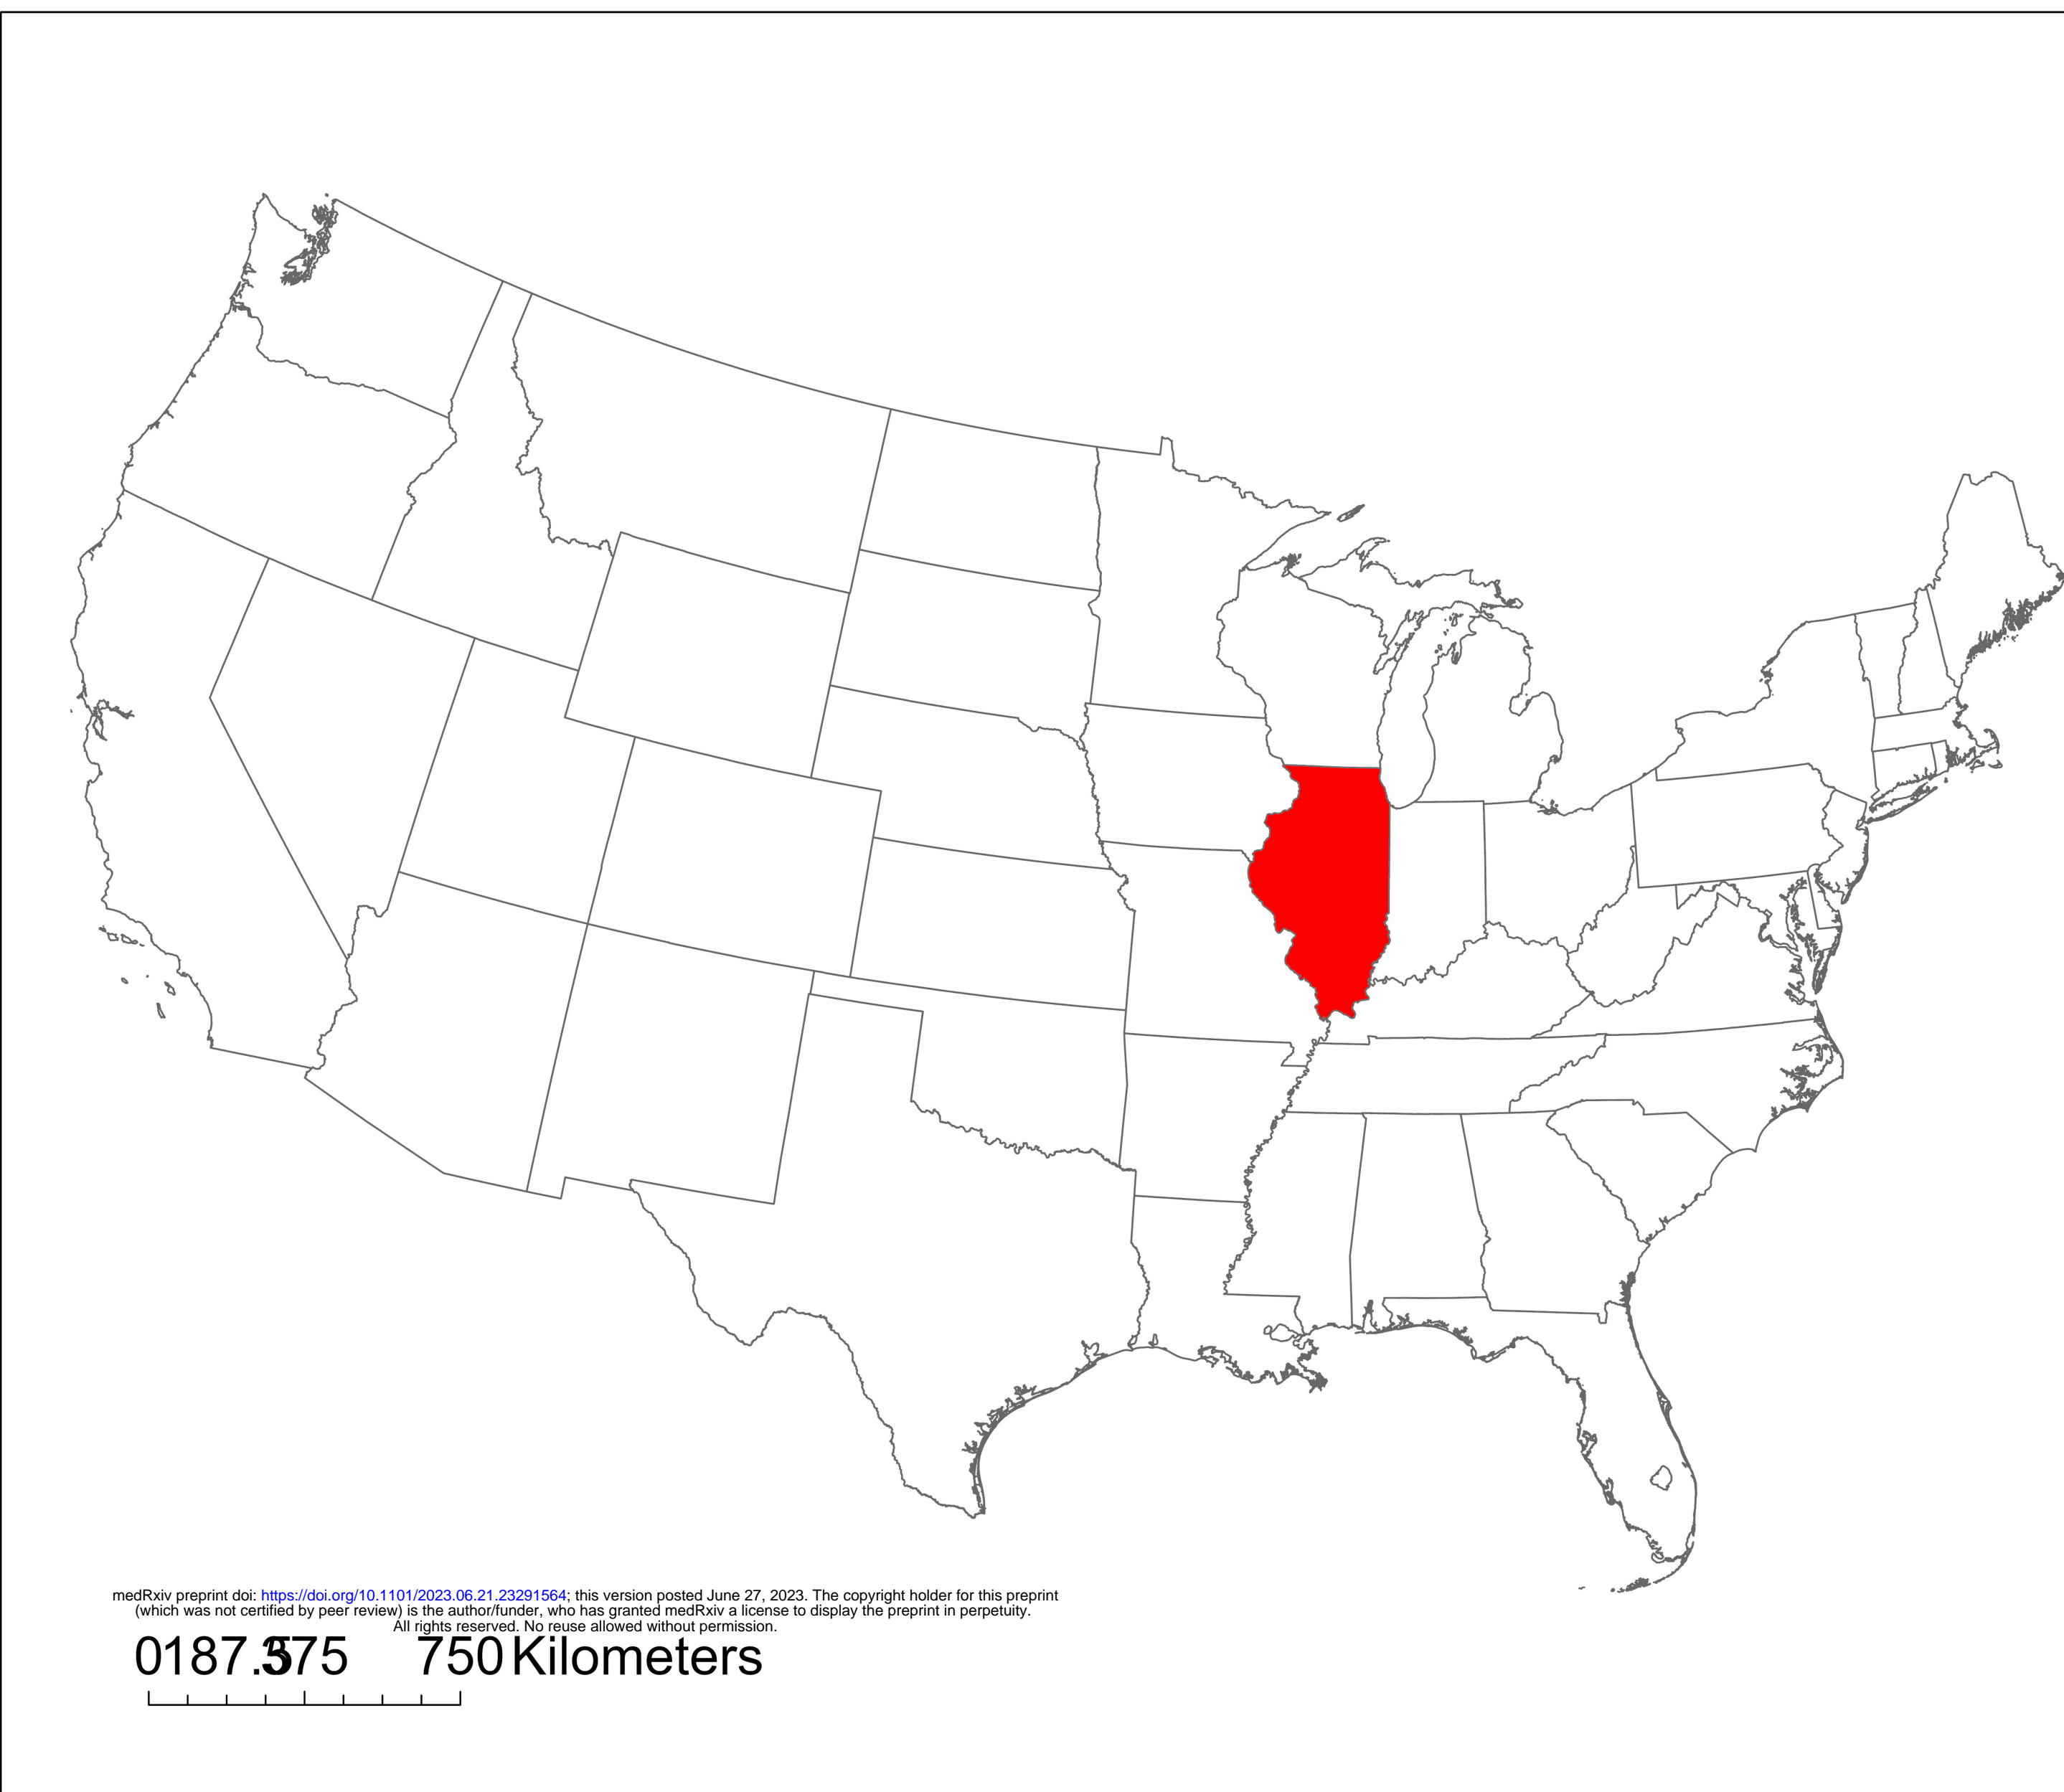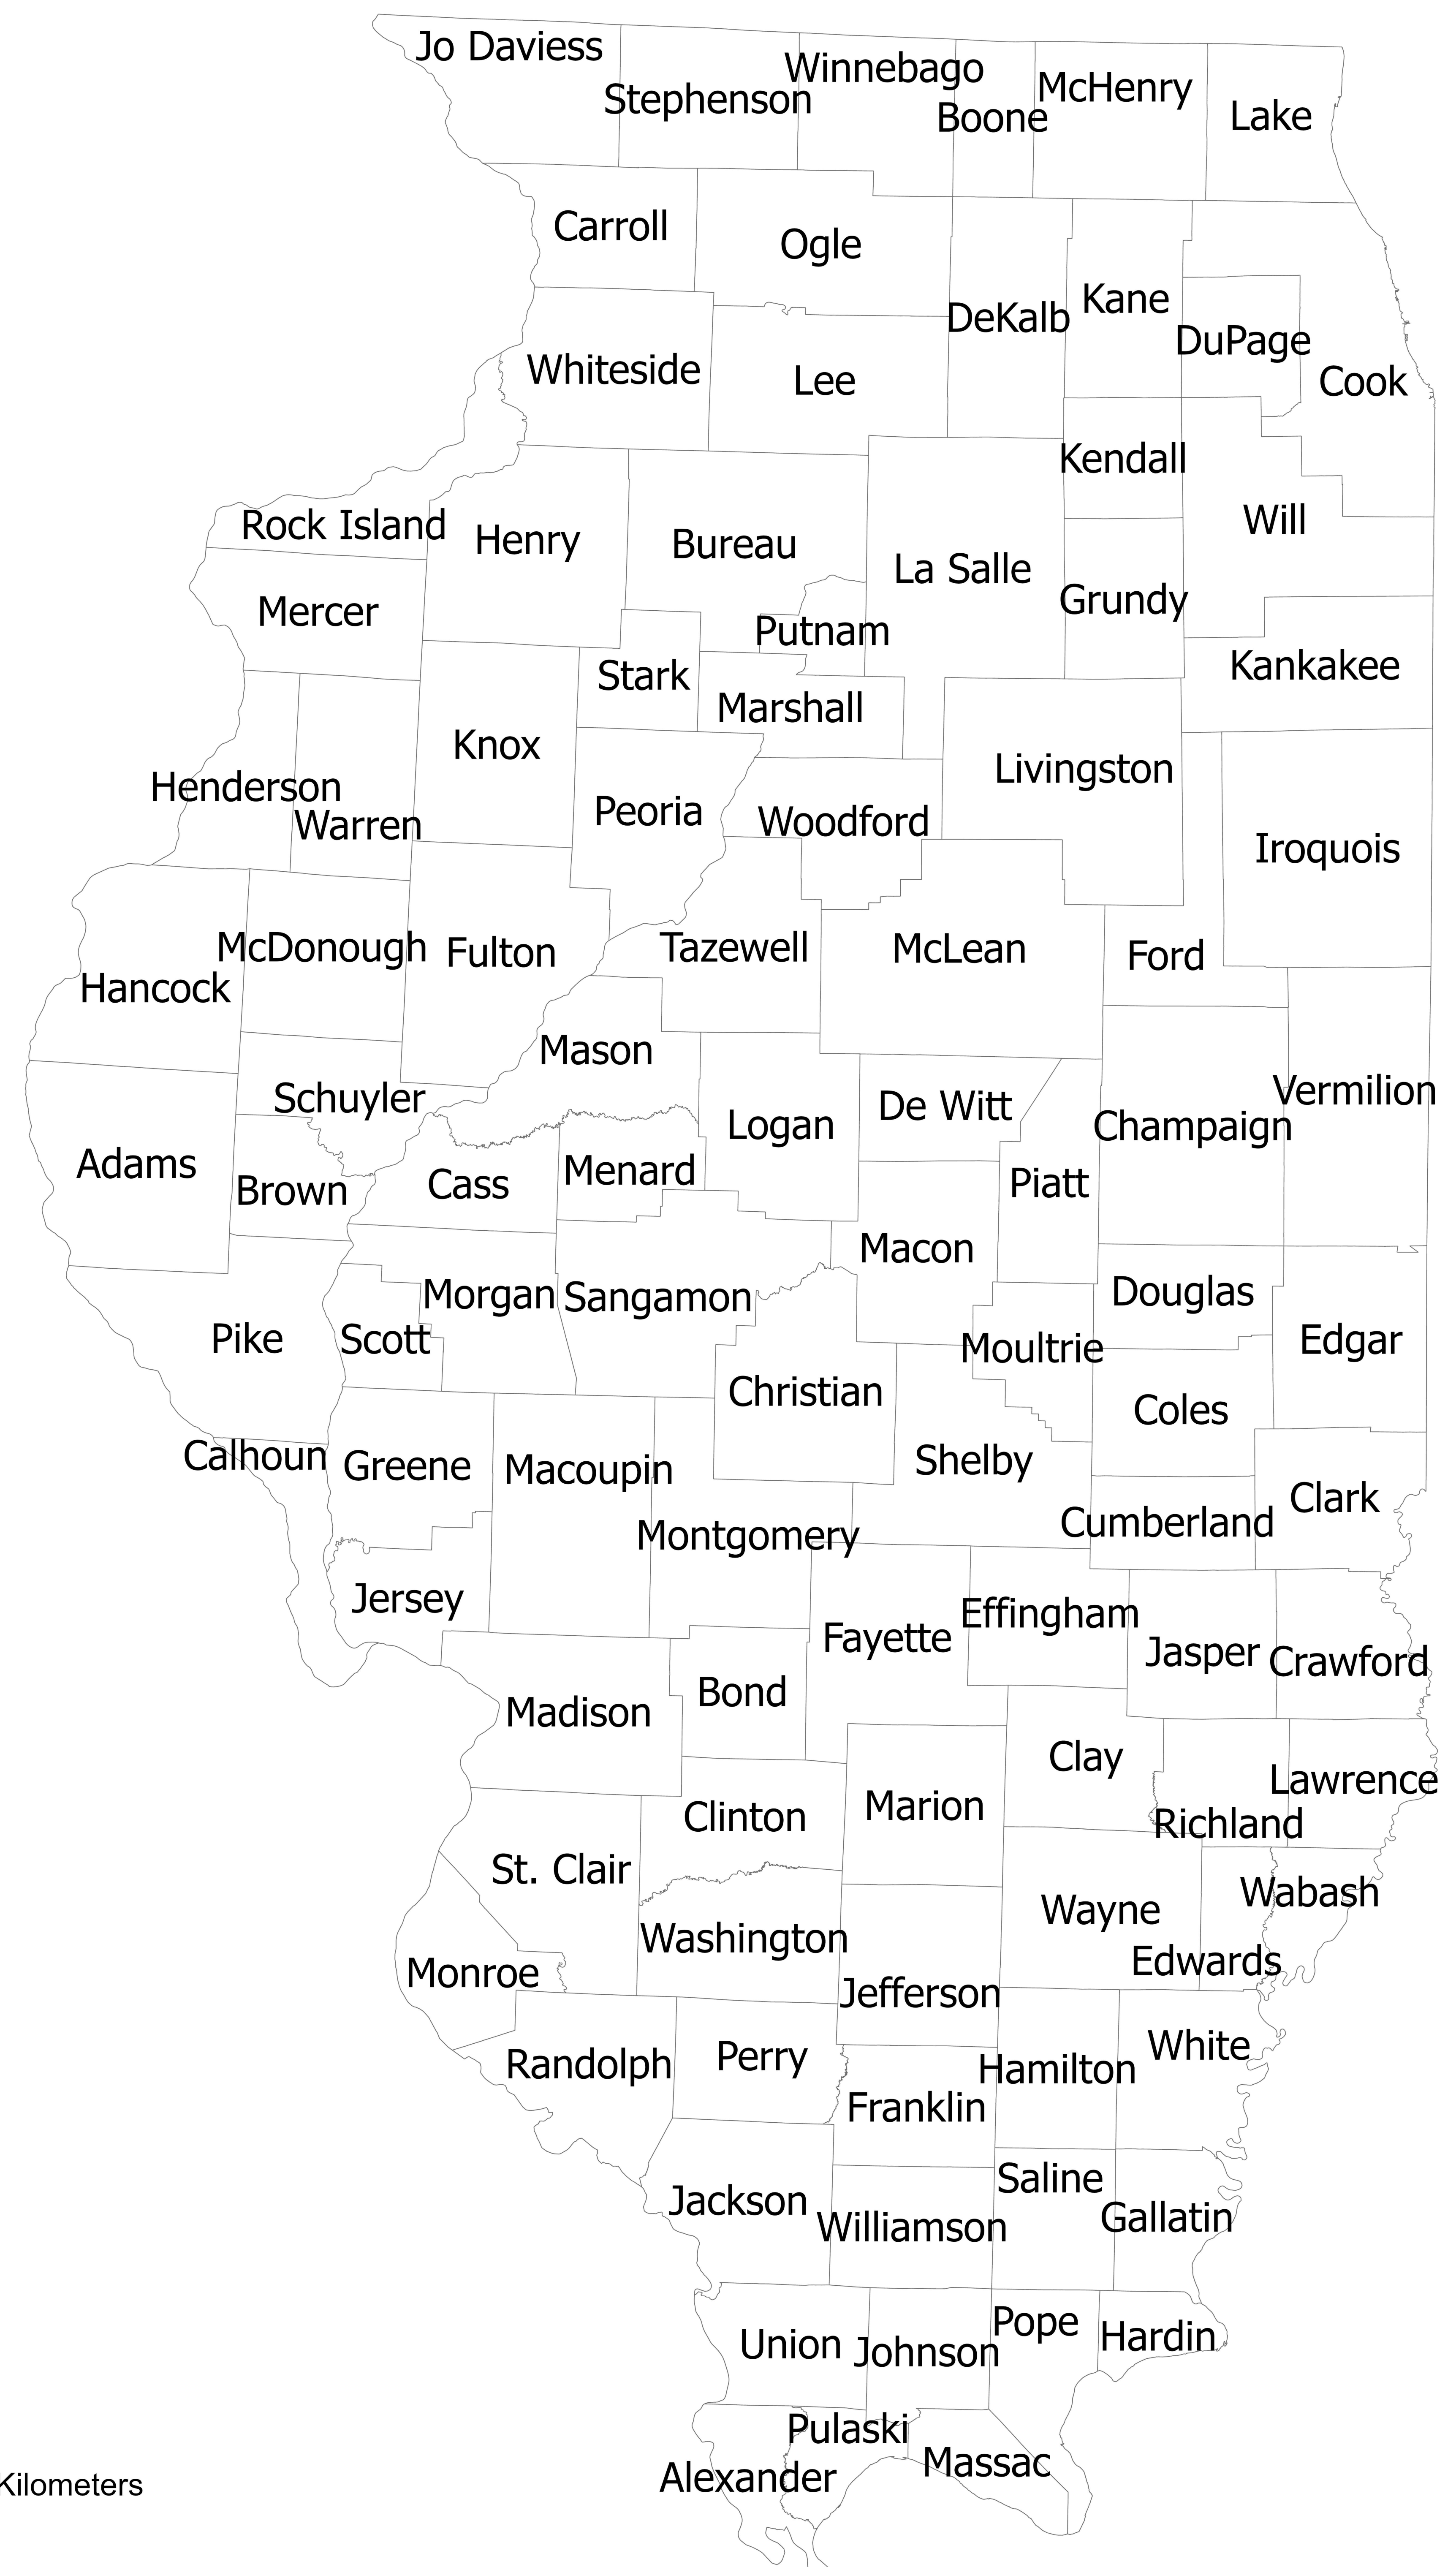



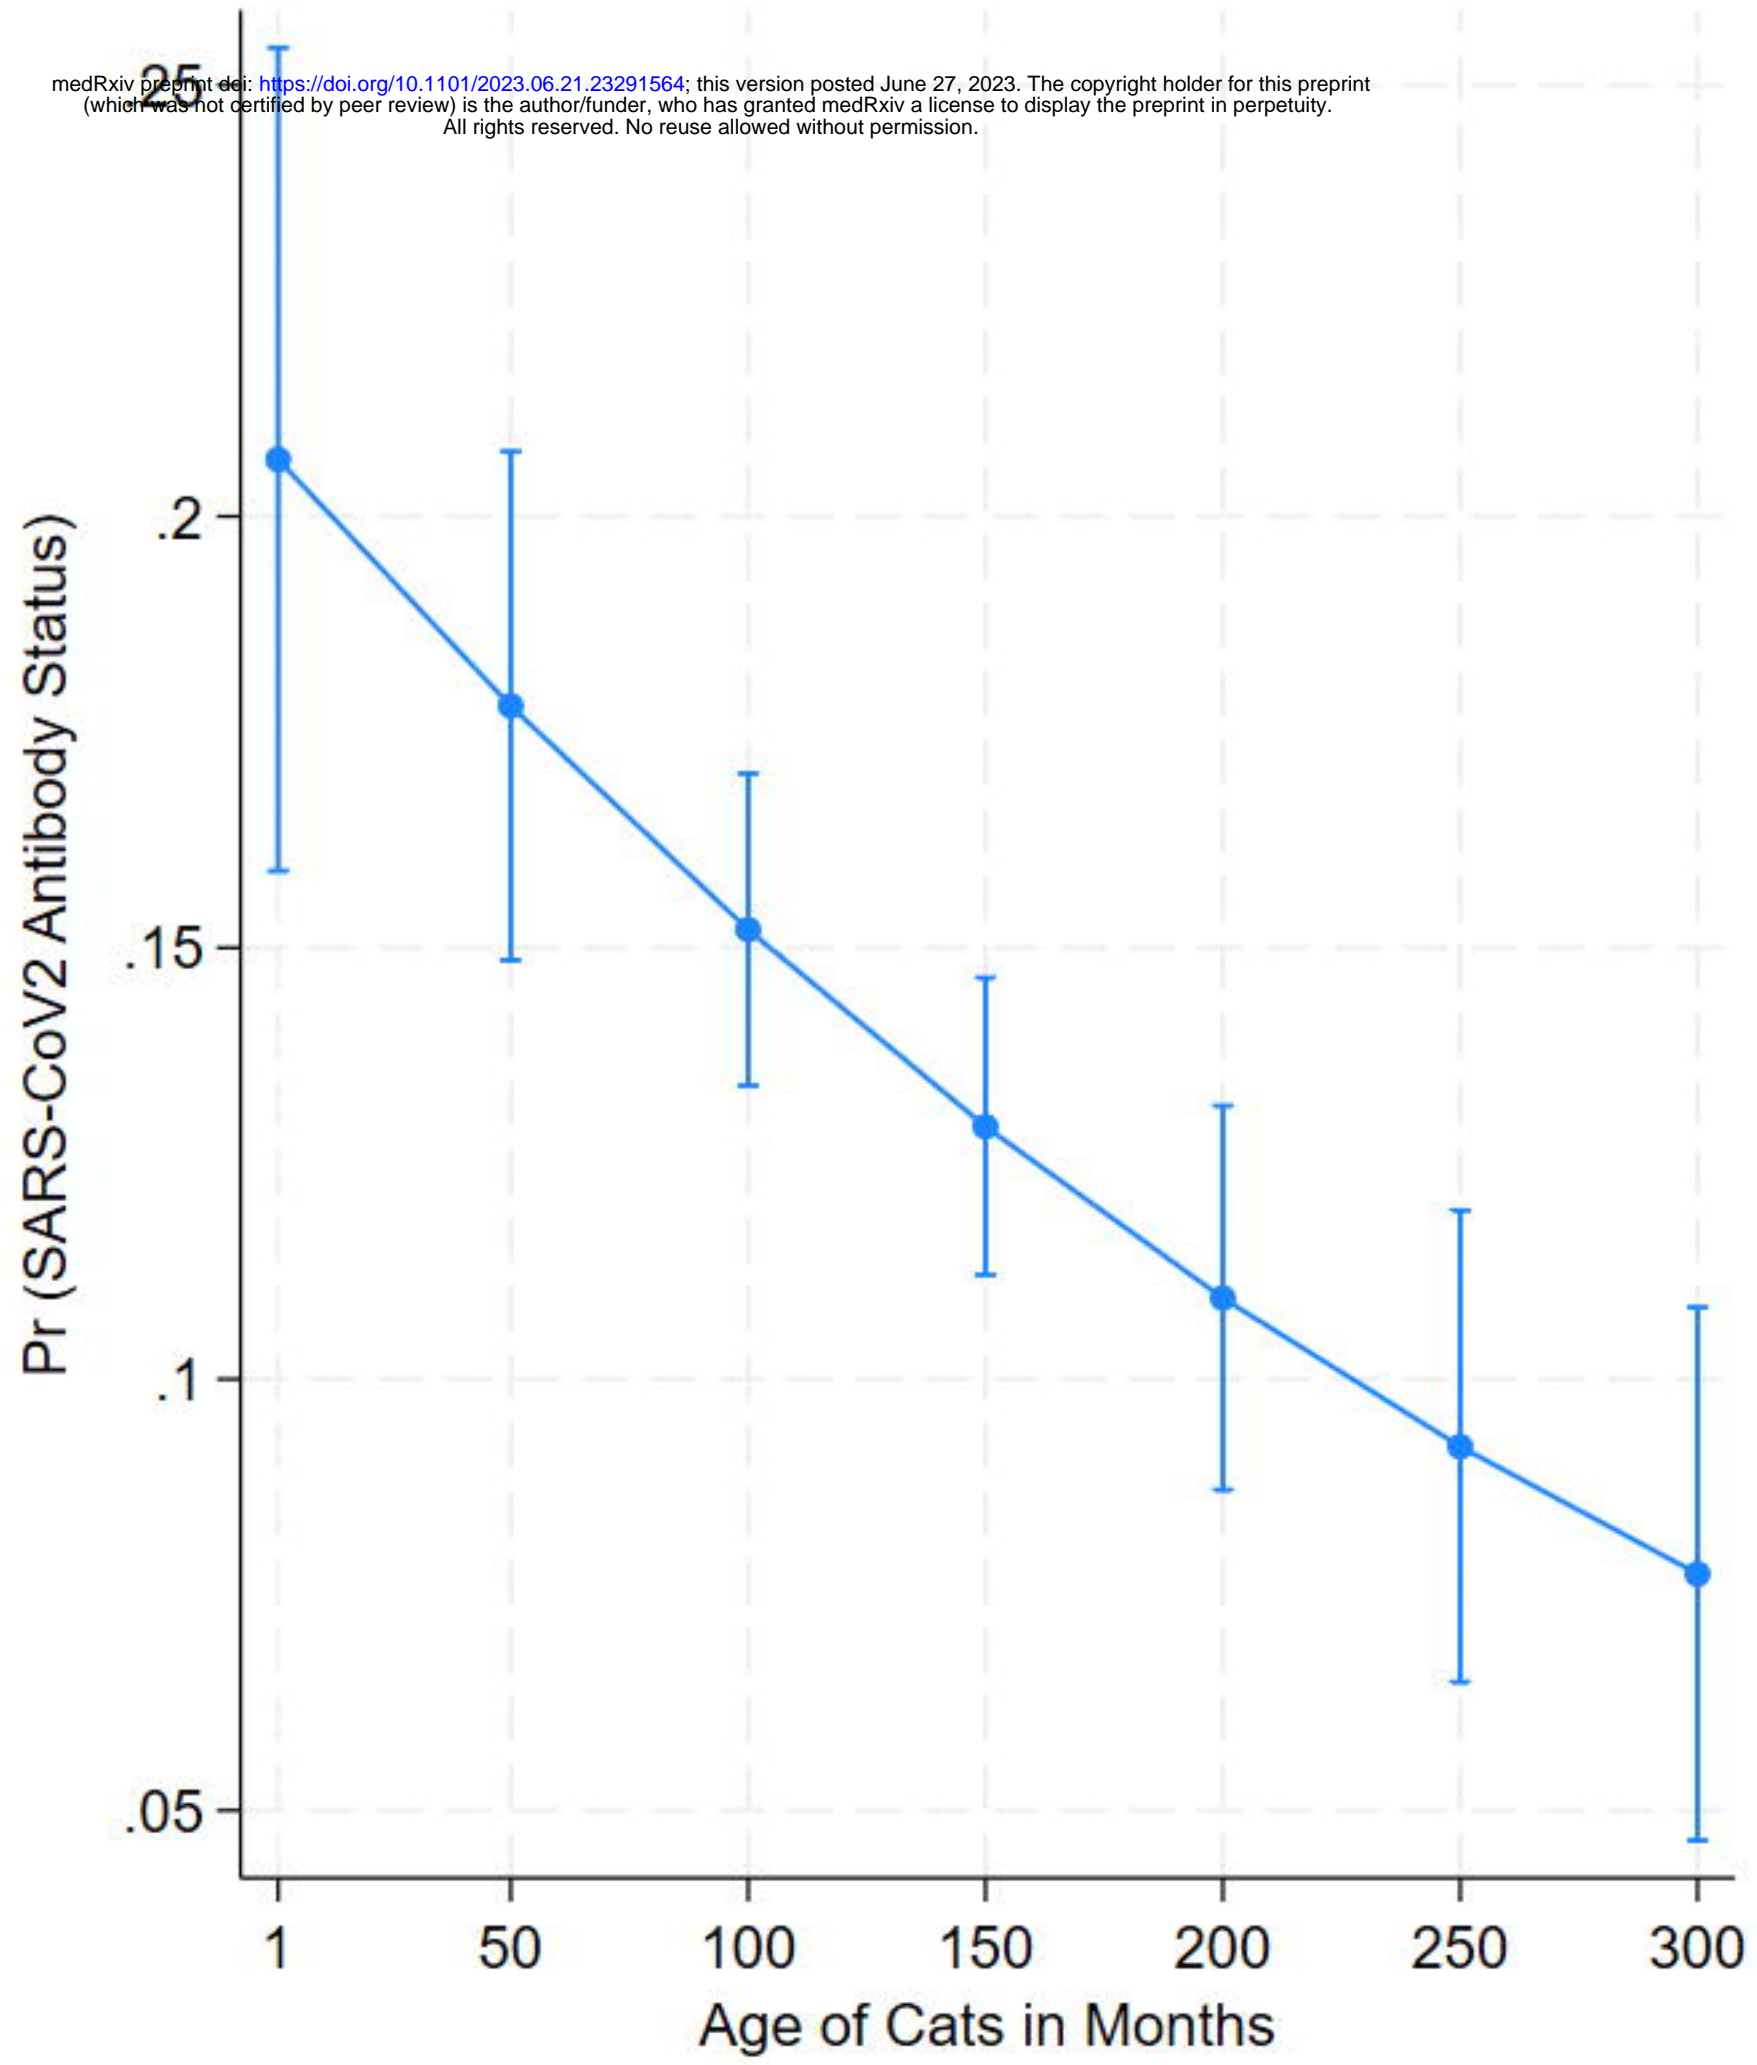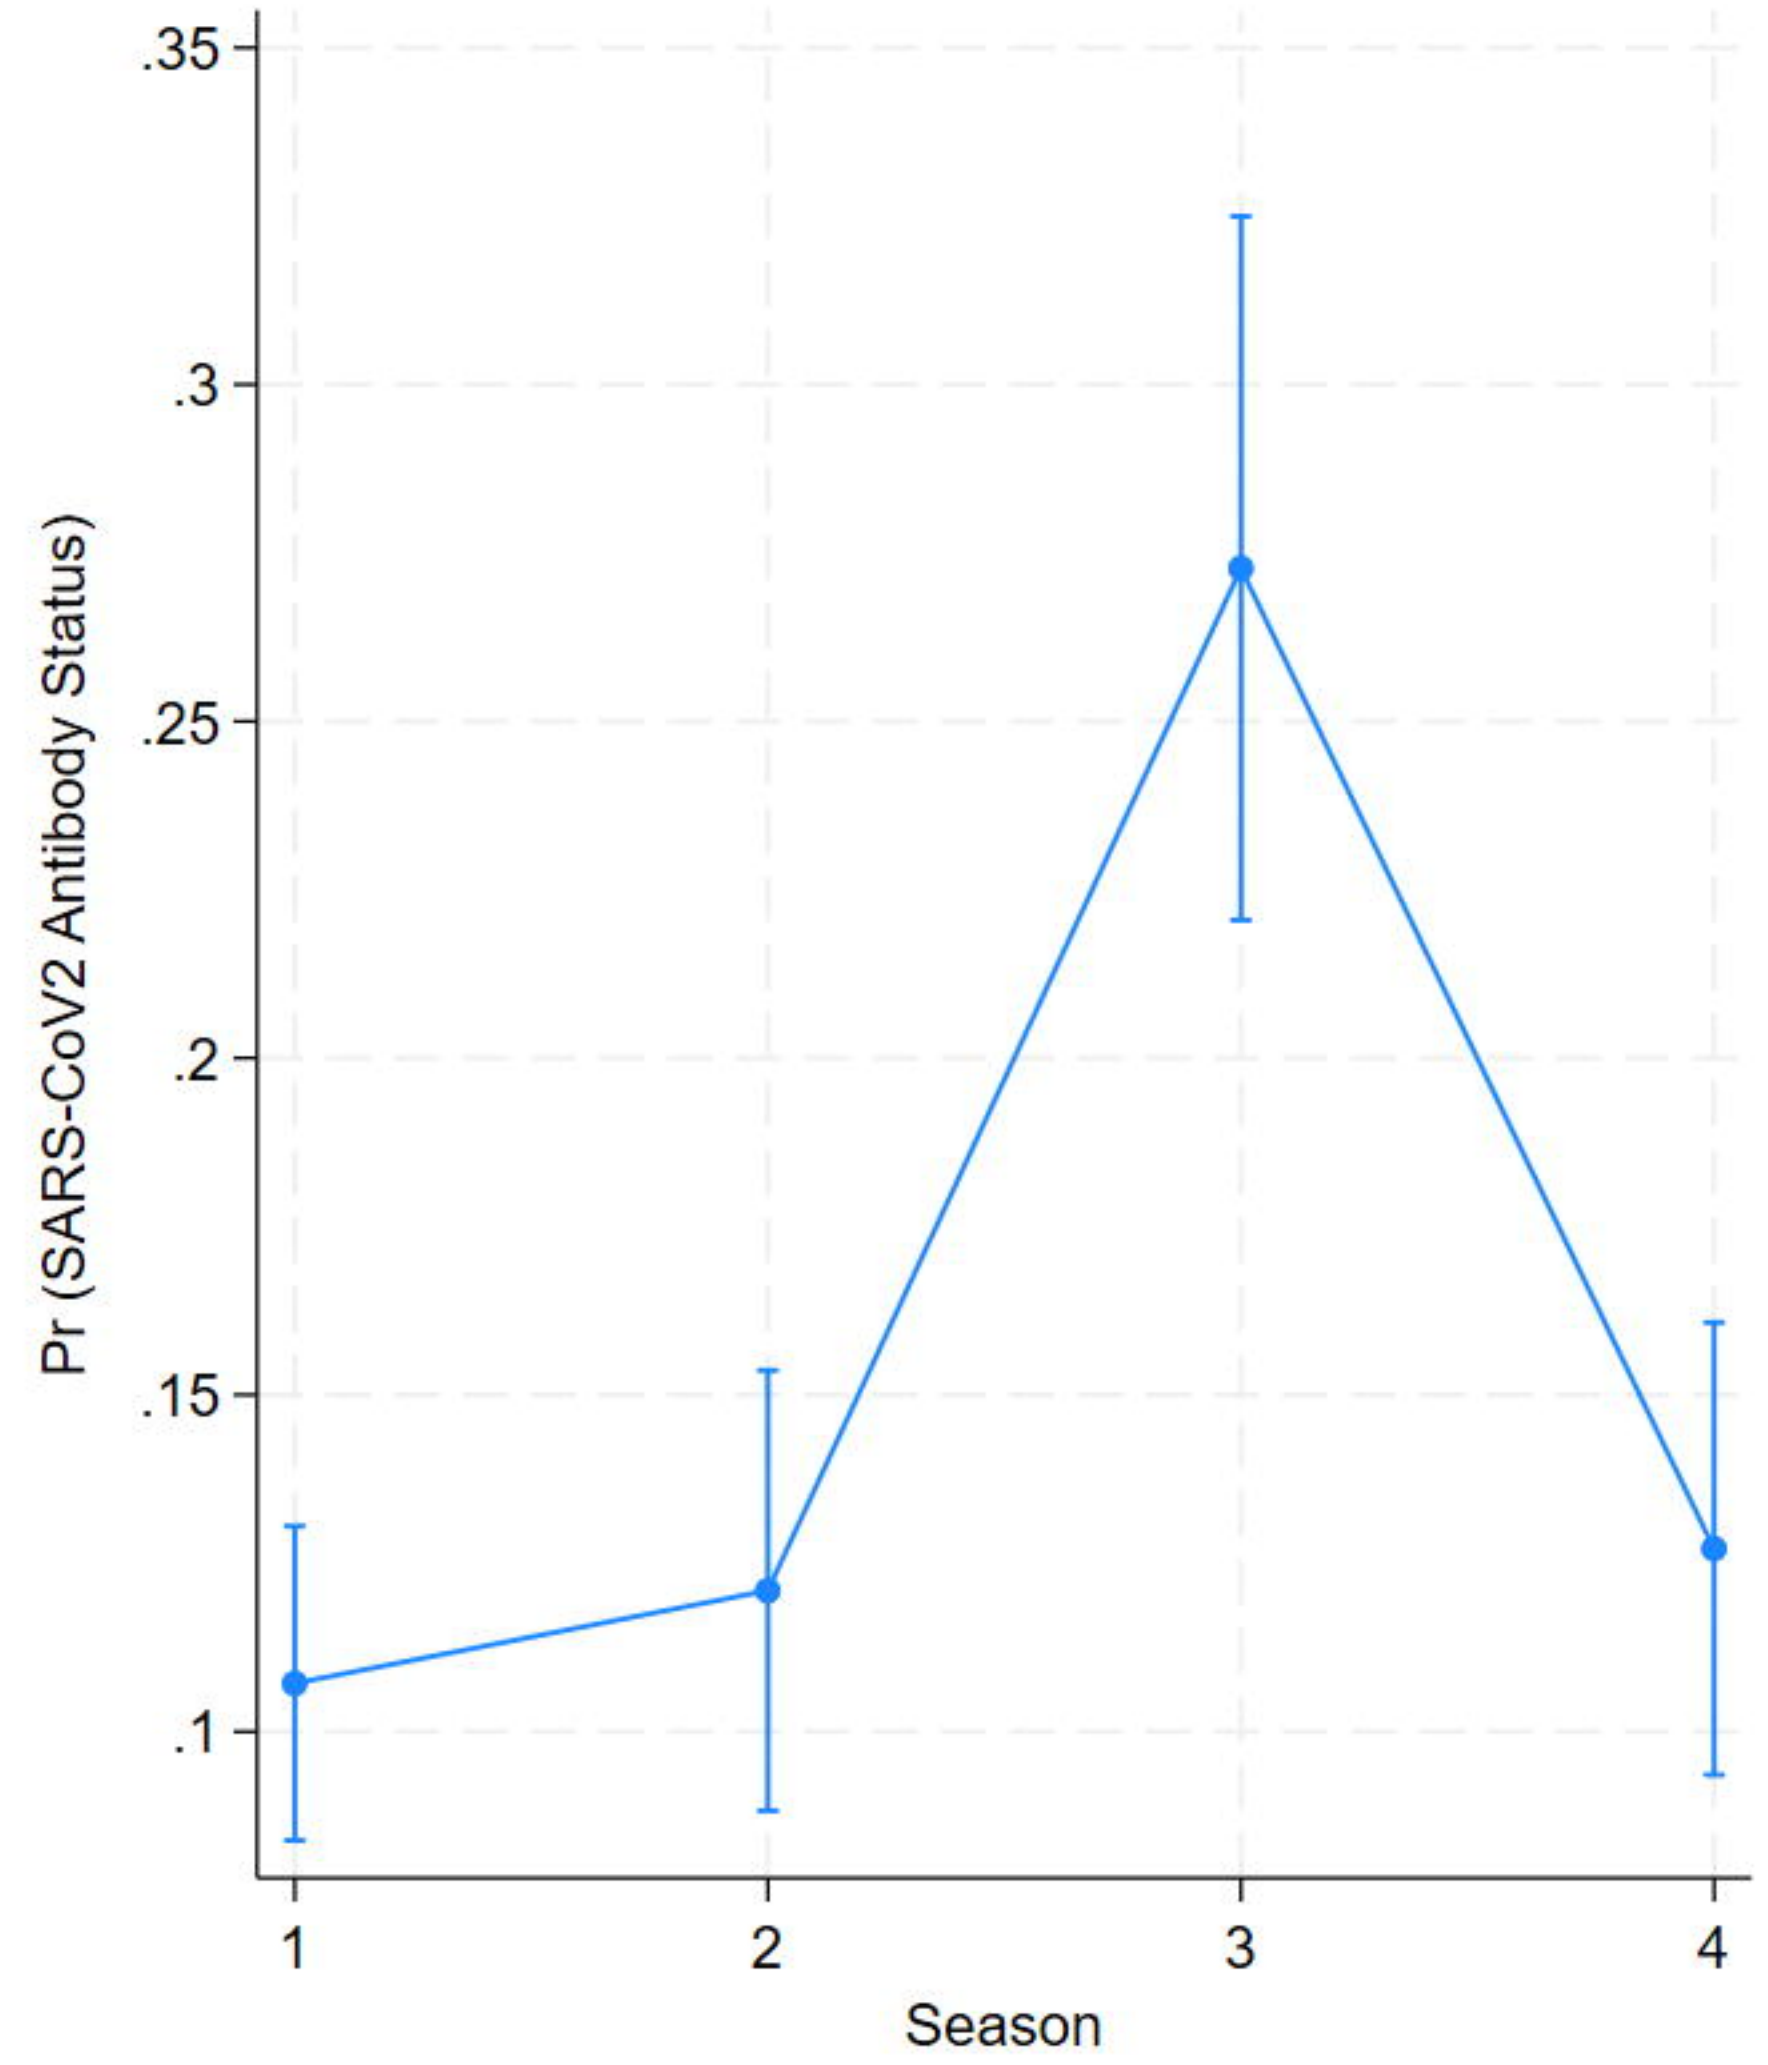

A

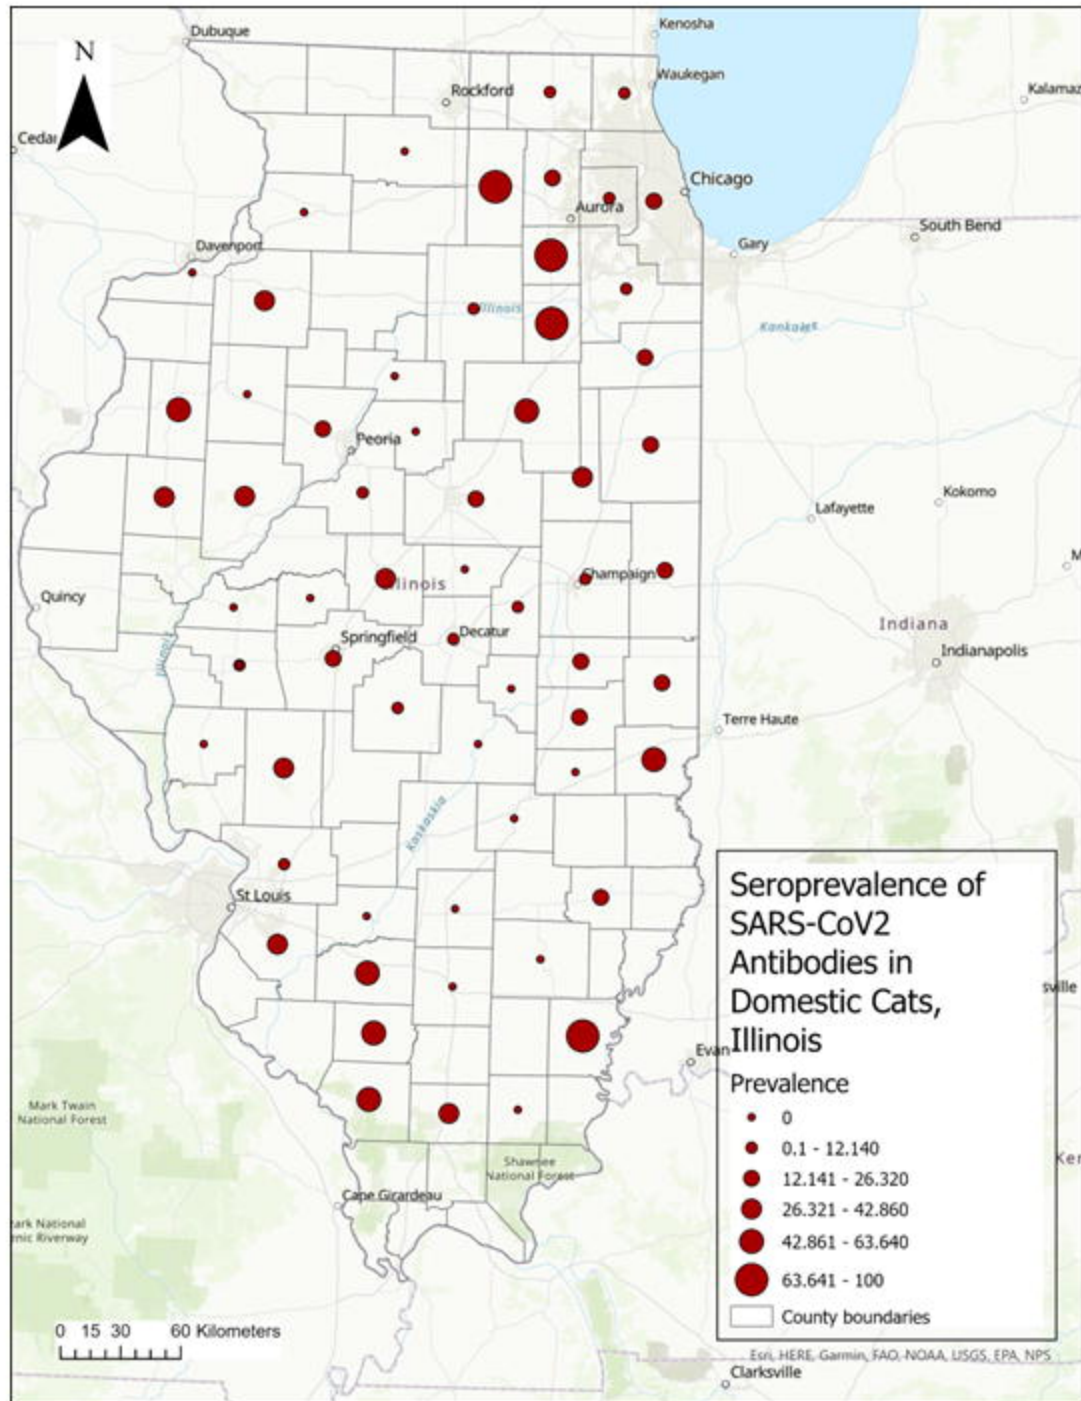

B

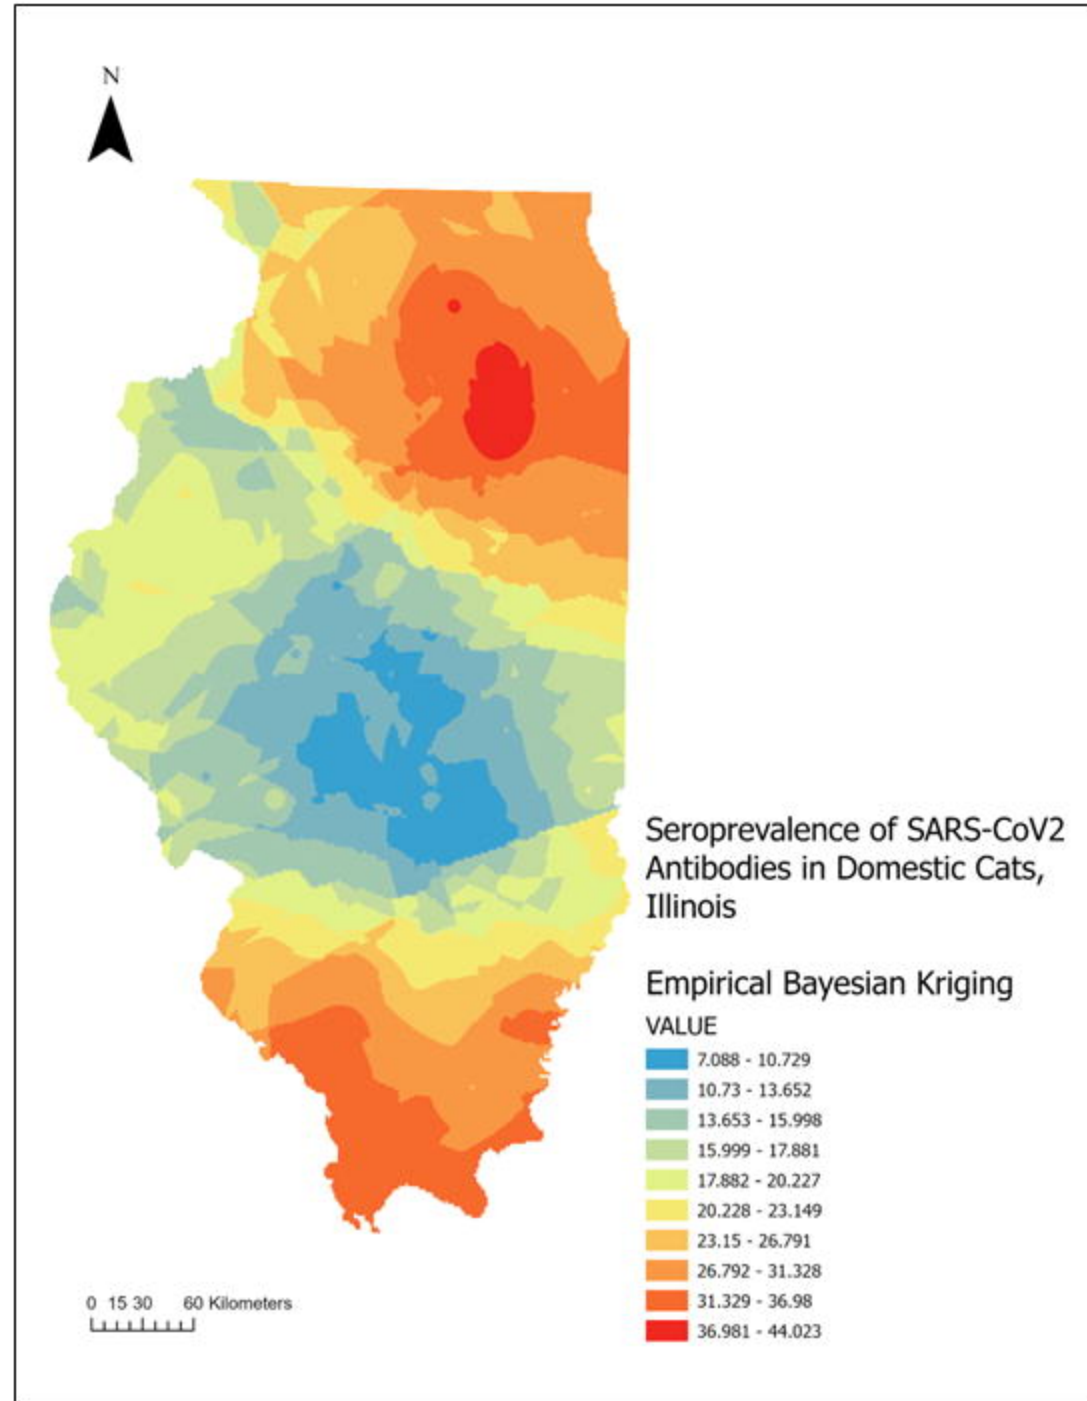

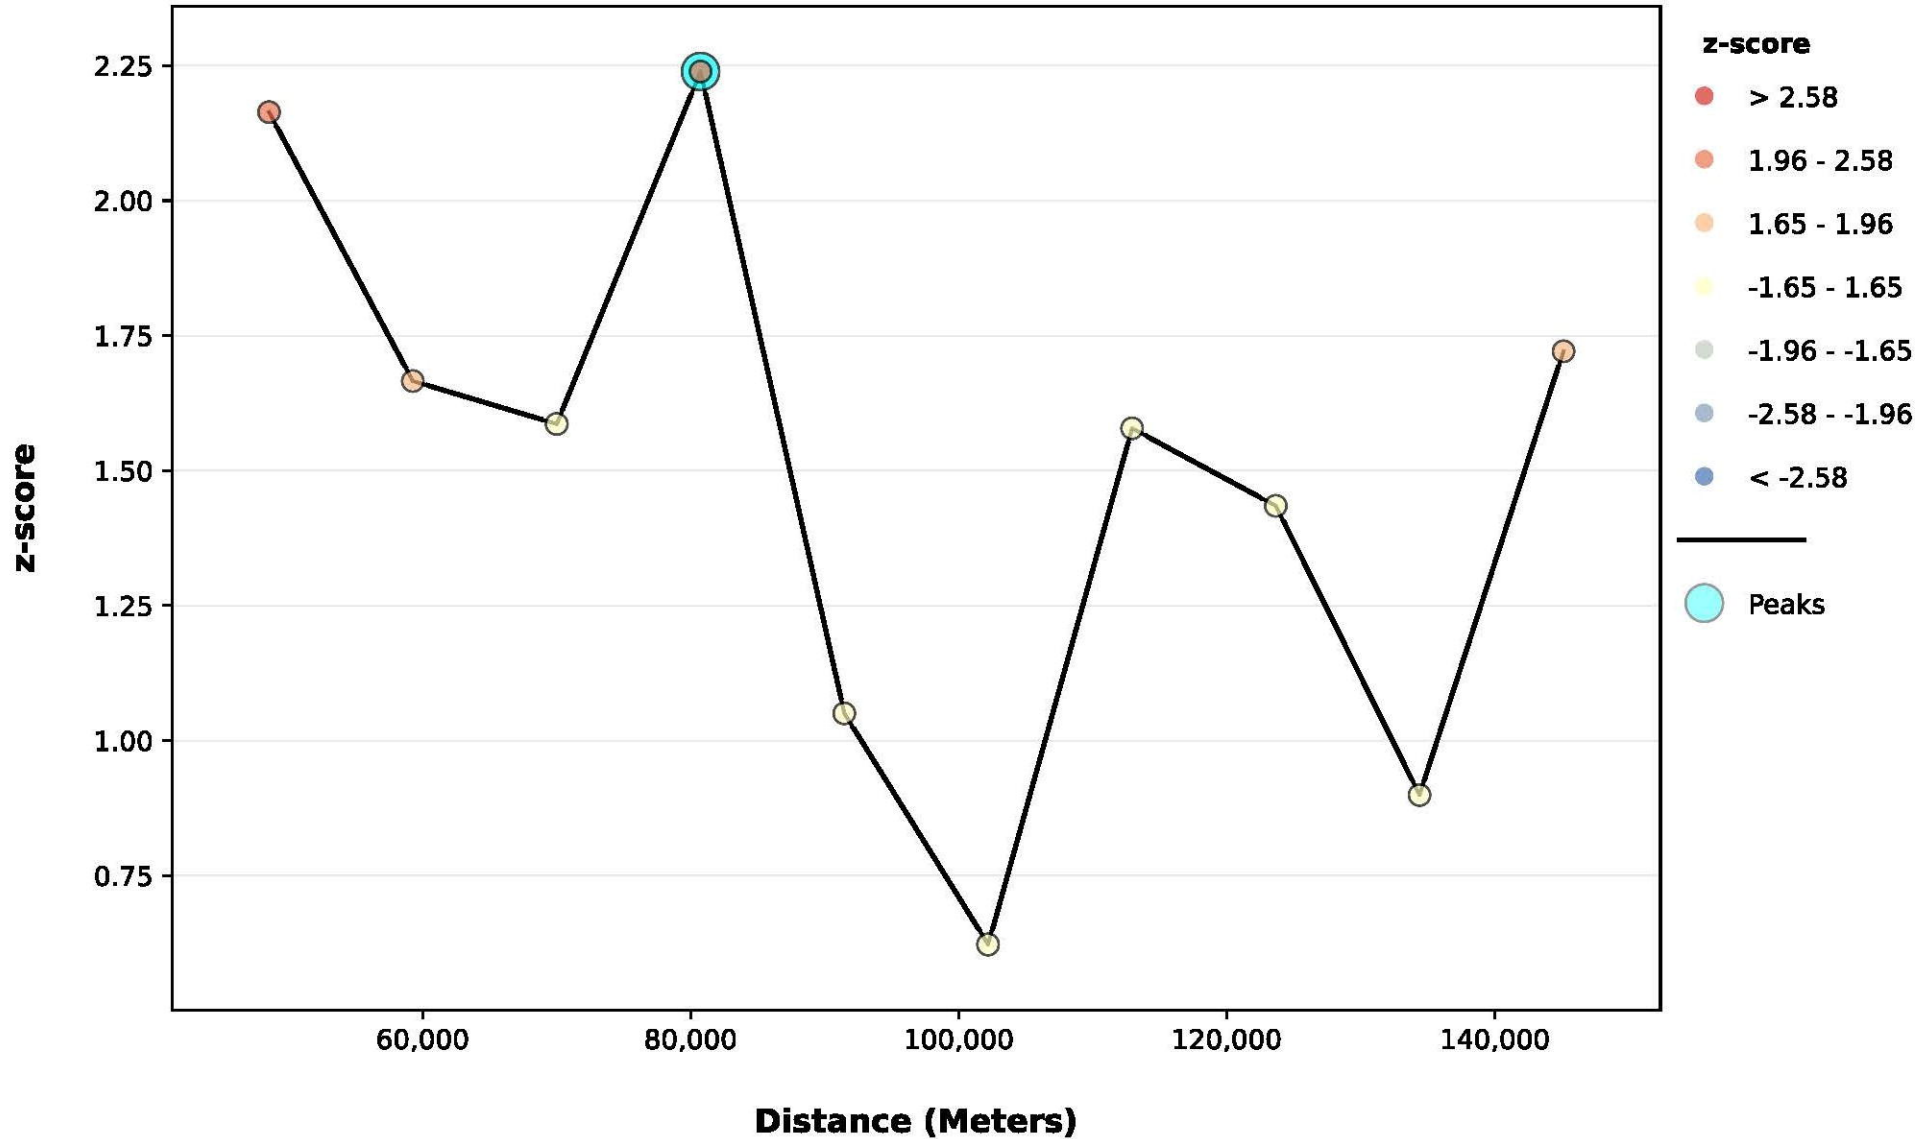

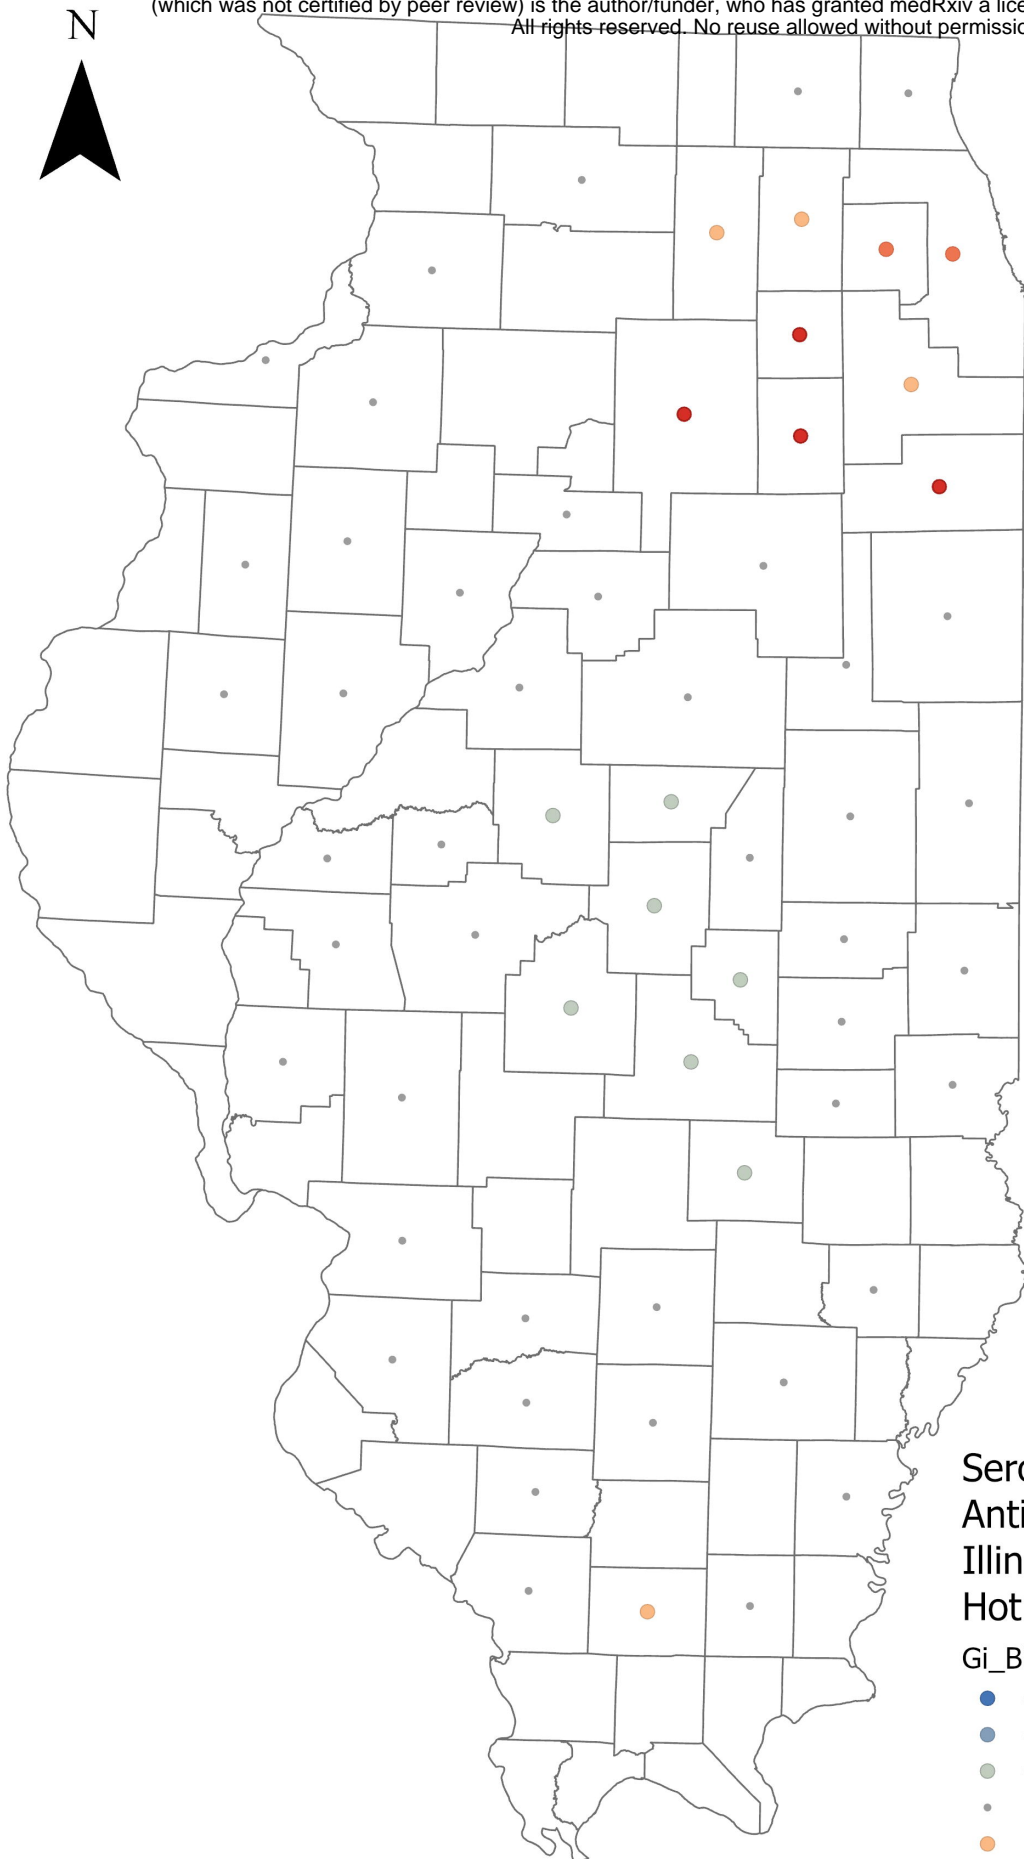

## Seroprevalence of SARS-CoV2 Antibodies in Domestic Cats, Illinois

### Hot Spot Analysis (Getis-Ord $G_i^*$ )

#### Gi\_Bin

- Cold Spot with 99% Confidence
- Cold Spot with 95% Confidence
- Cold Spot with 90% Confidence
- Not Significant
- Hot Spot with 90% Confidence
- Hot Spot with 95% Confidence
- Hot Spot with 99% Confidence

- County boundaries
- County Boundaries

0 12.525 50 Kilometers

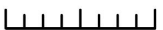



**A**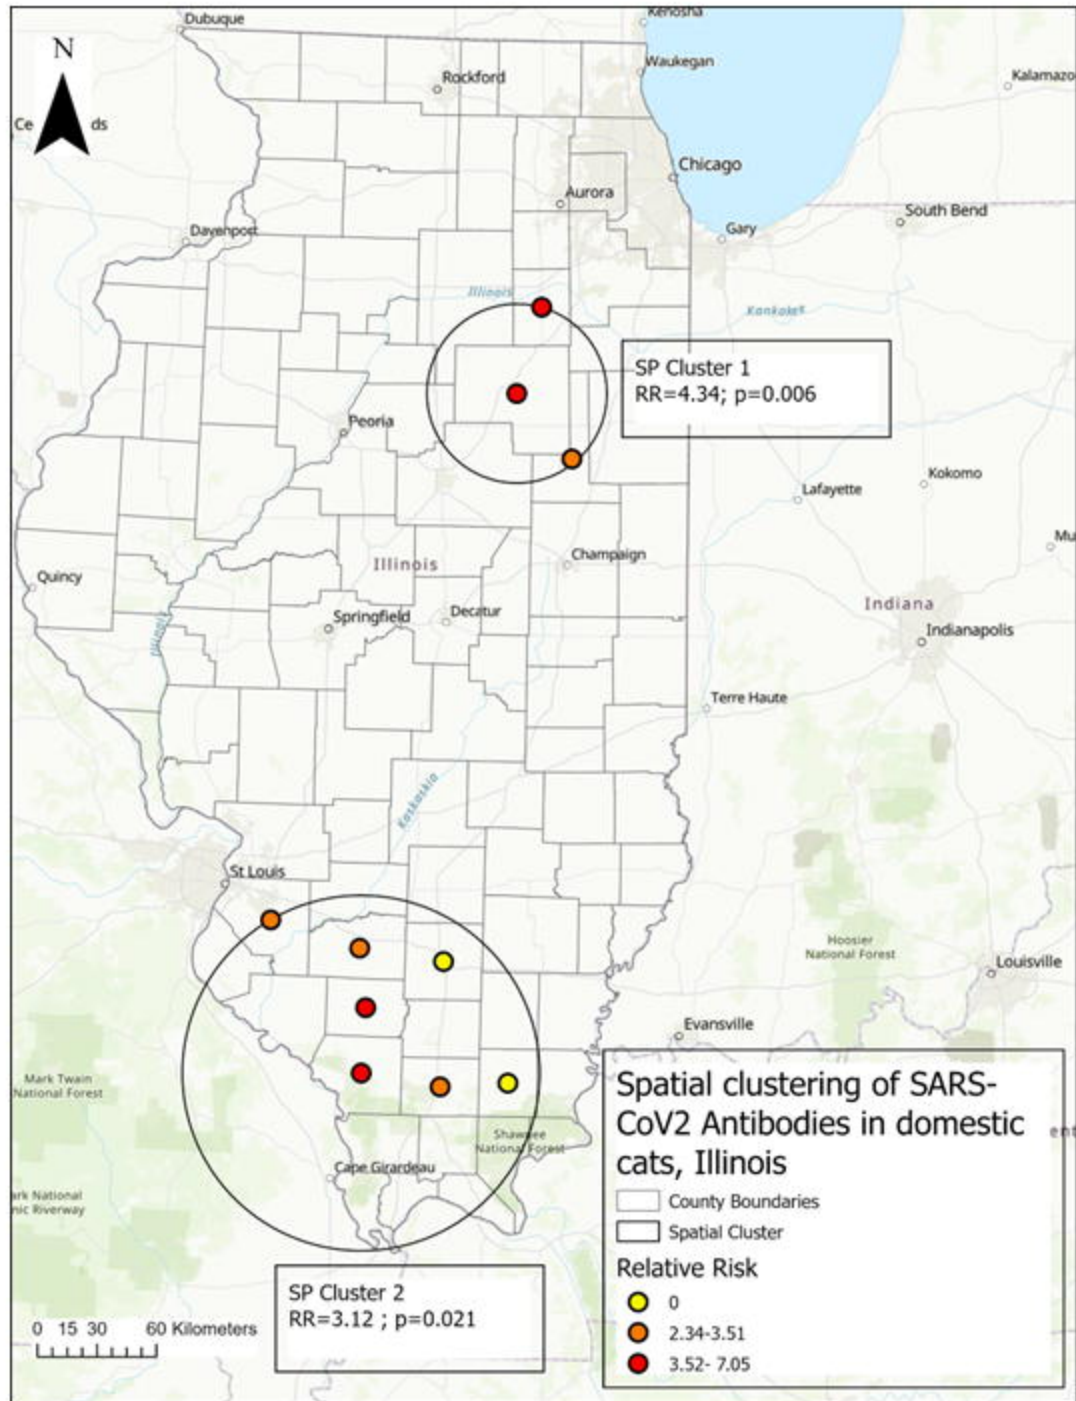**B**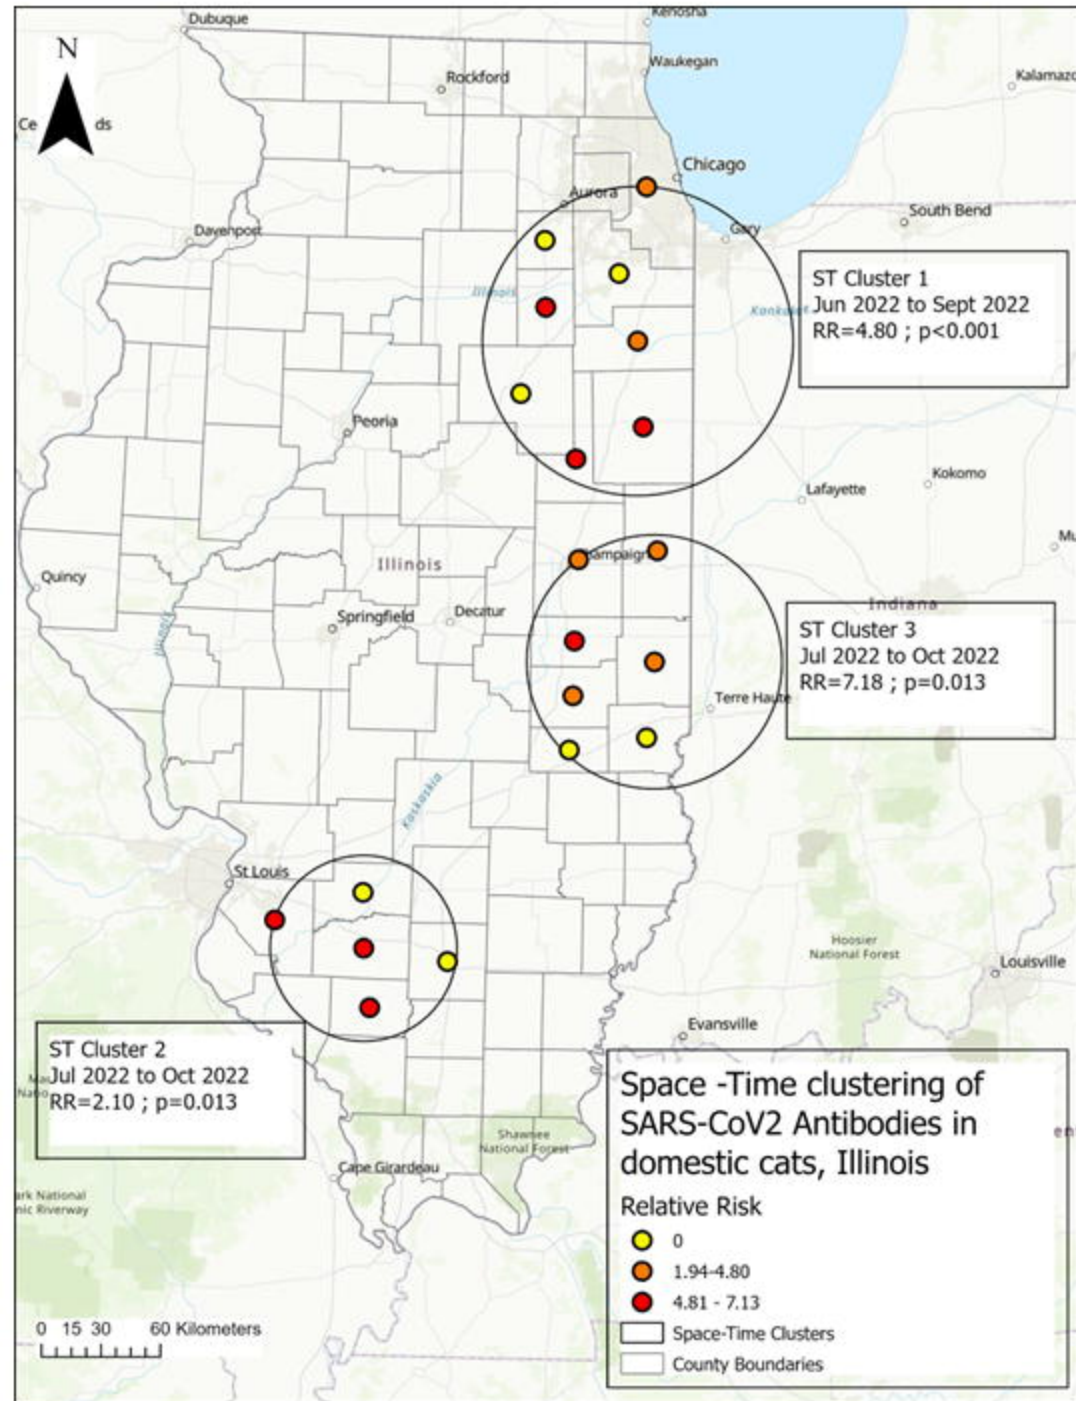

Source: https://medrxiv.org/content/10.1101/2023.06.21.23291564v1.full.pdf
