1

2 **Spatial and temporal clustering of anti-SARS-CoV-2 antibodies in**  
3 **Illinois household cats, 2021- 2023**

4 Chi Chen<sup>1</sup>, Mathias Martins<sup>2</sup>, Mohammed Nooruzzaman<sup>2</sup>, Dipankar Yettapu<sup>1</sup>, Diego  
5 G. Diel<sup>2</sup>, Jennifer M. Reinhart<sup>3</sup>, Ashlee Urbasic<sup>4</sup>, Hannah Robinson<sup>4</sup>,  
6 Csaba Varga<sup>1,5\*</sup>, Ying Fang<sup>1,5\*</sup>

7

8

9 <sup>1</sup>Department of Pathobiology, College of Veterinary Medicine, University of Illinois  
10 at Urbana-Champaign, Urbana, Illinois, USA

11

12

13 <sup>2</sup>Department of Population Medicine and Diagnostic Sciences, College of Veterinary  
14 Medicine, Cornell University, Ithaca, New York, USA

15

16

17 <sup>3</sup>Department of Veterinary Clinical Medicine, College of Veterinary Medicine,  
18 University of Illinois at Urbana-Champaign, Urbana, Illinois, USA

19

20

21 <sup>4</sup>Veterinary Diagnostic Laboratory at Veterinary Specialty Center, University of  
22 Illinois at Urbana-Champaign, Buffalo Grove, Illinois, USA

23

24

25 <sup>5</sup>Carl R. Woese Institute for Genomic Biology, University of Illinois at Urbana-  
26 Champaign, Urbana, Illinois, USA

27

28

29 \* To whom correspondence should be addressed:

30 [cvarga@illinois.edu](mailto:cvarga@illinois.edu) (Csaba Varga) and [yingf@illinois.edu](mailto:yingf@illinois.edu) (Ying Fang)

31

32 **Running title:** SARS-CoV-2 seroprevalence of IL household cats

33

34 **Keywords:** SARS-CoV-2, Cats, Seroepidemiologic Studies

35

36 **ABSTRACT**

37 This study evaluated the seroprevalence of SARS-CoV-2 antibodies in Illinois  
38 household cats from October 2021 to May 2023. Among 1,715 samples tested by  
39 serological assays, 244 samples (14%) tested positive. High-rate temporal, spatial, and  
40 space-time clusters of SARS-CoV-2 cases were assessed within 63 counties in Illinois.  
41 Three space-time clusters with higher than expected seroprevalence rates were  
42 identified in the northeastern, central-east, and southwest regions of Illinois, occurring  
43 between June and October 2022. Young cats had a higher seropositivity than older  
44 cats, and the third quarter of the year had the highest odds of seropositivity . This  
45 study provides an in-depth analysis of SARS-CoV-2 epidemiology in Illinois  
46 household cats, which will aid in COVID-19 control and prevention.

47

48 **Article summary line:** SARS-CoV-2 antibody seroprevalence was assessed in  
49 Illinois domestic cats, in which a higher seropositivity rate was clustered in the  
50 northern, central, and southern Illinois regions with peak periods occurring between  
51 June and October 2022.

52

---

53 **INTRODUCTION**

54 Severe acute respiratory syndrome coronavirus 2 (SARS-CoV-2), the causative  
55 agent of Coronavirus Disease 2019 (COVID-19), is a novel virus that emerged in late  
56 2019 in Wuhan, China (1-3). It belongs to the family *Coronaviridae* within the order  
57 *Nidovirales*, which is a group of positive-stranded RNA viruses possessing unique  
58 characteristics (4, 5). SARS-CoV-2 has a broad host range and is the seventh  
59 coronavirus that could infect humans (6-8). SARS-CoV-2 gains entry into host cells  
60 by binding to the angiotensin-converting enzyme 2 (ACE2) receptor through its spike  
61 (S) protein. ACE2 receptors in some animals are similar to those in humans, leading  
62 to increased susceptibility to the virus (9). The reported infected animals include cats,  
63 dogs, deer, mink, hamsters, etc. (10-14).

64 SARS-CoV-2 has been reported to be transmitted from humans to animals  
65 including cats, minks, and hamsters (15-18). Such transmission events raise concerns  
66 about potential reservoirs in animal populations, which could lead to further spillover  
67 events and threats to public health. Recent serological surveillance in cats reported a  
68 seropositivity range of 15% in China, 1% in Germany, and 5% in Portugal (19-21).  
69 The prevalence of SARS-CoV-2 in domestic household cats has not been well-defined  
70 in the United States of America.

71 In this study, we investigated the seroprevalence of SARS-CoV-2 antibodies in  
72 domestic cats in Illinois from October 2021 to May 2023. Spatial, temporal, and  
73 space-time scan statistical models were used to identify clusters of higher-than-

74 expected antibody-positive cats. A logistic regression model was constructed to  
75 evaluate the impact of age and season on the odds of SARS-CoV-2 seroprevalence in  
76 domestic cats. The prevalence, temporality, and space-time clustering of SARS-CoV-2  
77 infection in household cats in Illinois could guide future COVID-19 prevention and  
78 control programs.

## 79 **METHODS**

### 80 **Data sources**

81 The study period extended from February 2021 to May 2023, which included  
82 1715 serum samples from household cats in 63 counties across Illinois. Samples were  
83 obtained from the Clinical Pathology Laboratory at the University of Illinois  
84 Veterinary Diagnostic Laboratory (Urbana, IL) and its satellite lab at the Veterinary  
85 Specialty Center (Bannockburn, IL). Samples consisted of excess serum submitted for  
86 unrelated, clinical purposes to the laboratories. No blood was collected specifically  
87 for the purpose of this study. Thus, the method of collection does not constitute  
88 animal use and did not require review by the University of Illinois Institutional  
89 Animal Care and Use Committee. All data were completely anonymized, with  
90 identifiers such as names and addresses removed, and unique IDs assigned to the cat  
91 populations to maintain confidentiality.

### 92 **Study setting**

93 The research centered on Illinois [Degrees, Minutes, Seconds (DMS) 40° 0' 0" N,  
94 89° 0' 0" W], a state situated in the Midwest of the United States, with its most

95 populous city, Chicago, positioned on Lake Michigan's southwestern coast (**Fig 1**).

## 96 **Serological tests**

97       A blocking enzyme-linked immunosorbent assay (bELISA) for detecting SARS-  
98 CoV-2 specific antibody response was developed and validated in-house. The detailed  
99 method was described in our previous publication (22, 23). All the serum samples  
100 collected from the cats were initially screened by bELISA. The samples with positive  
101 bELISA results were subsequently confirmed by virus-neutralizing assay and Lumit™  
102 Dx SARS-CoV-2 Immunoassay to confirm the positive status. The detailed method  
103 for the virus-neutralizing assay was described previously (10), in which SARS-CoV-2  
104 variant D614G and Omicron were used to test the neutralizing ability of the serum  
105 antibody. Lumit™ Dx SARS-CoV-2 Immunoassay is a commercial assay (Promega,  
106 Madison, Wisconsin). The lumit assay was conducted following the manufacturer's  
107 instructions.

## 108 **Logistic regression analysis**

109       To assess the impact of the age of cats on the seroprevalence of SARS-CoV-2  
110 antibodies, a logistic regression model was constructed. The predictor variable was  
111 represented by the age of cats in months while the outcome variable signified whether  
112 the SARS-CoV-2 antibody was detected or not. An odds ratio (OR), 95% confidence  
113 intervals, and p-value were calculated for the outcome variable. . An OR of < 1  
114 indicated that the probability of SARS-CoV-2 antibody positivity decreased with an  
115 increase in age, and if the OR > 1 then the probability of positivity increased with an

116 increase in age. To interpret the results, marginal effects for a series of age intervals  
117 were calculated and illustrated in a figure.

### 118 **Spatial Analysis**

119 All maps for this study were built using ArcGIS Pro version 3.0.3  
120 (Environmental Systems Research Institute, Inc. (ESRI), Redlands, CA, USA).

121 The analysis was carried out at the county level, a well-defined geographical area  
122 used for administrative and statistical purposes in the United States (**Fig 1**). For all  
123 spatial analysis, NAD 1983 UTM Zone 16N was used as projection.

124 For the spatial statistical analysis, the spatial scale was represented by the  
125 counties' centroids, and to each centroid, a value representing the seroprevalence in a  
126 county (number of positive samples divided by the total samples tested) was linked.  
127 Euclidean distance bands were used to measure distances from each county centroid  
128 to the neighboring county centroids.

### 129 **Disease mapping**

130 A point map was constructed to illustrate the distribution of the county-level  
131 seroprevalence of SARS-CoV-2 antibodies in Illinois household cats, using Natural  
132 Jenks classification to define the intervals (24).

133 Spatial interpolation of the seroprevalence of SARS-CoV-2 antibodies in Illinois  
134 domestic cats was performed using the Empirical Bayesian Kriging method, which  
135 applied a restricted maximum likelihood estimation and constructed several  
136 semivariograms to account for the error when estimating the semivariogram (25). The

137 result of the spatial interpolation was illustrated in an isopleth map.

### 138 **Global spatial cluster analysis**

139 The Incremental Spatial Autocorrelation (Global Moran's I) Tool was used to  
140 evaluate the global clustering of seroprevalence of SARS-CoV-2 antibodies by  
141 assessing a series of incrementally increasing distances and examining the strength of  
142 global spatial clustering at each distance (26).

143 The starting distance was at which each location had at least one neighbor. For  
144 each distance, a Moran's I Index value and a z-score and p-value were calculated to  
145 test the null hypothesis of spatial randomness. The zone of indifference parameter for  
146 the conceptualization of spatial relationships was used for the local and global spatial  
147 cluster analysis (26). The distance band with the highest global clustering (highest  
148 Moran's I Index) was selected for the local spatial cluster analysis.

### 149 **Local Spatial Cluster Analysis**

150 The Getis-Ord  $G_i^*$  statistic (27) was used to identify county-level statistically  
151 significant hot spots and cold spots. Hot spots signified counties with a high  
152 seroprevalence of SARS-CoV-2 antibodies surrounded by counties with high  
153 seroprevalence; whereas cold spots indicated counties with low seroprevalence  
154 surrounded by counties with low seroprevalence.

### 155 **Temporal, spatial, and space-time scan statistic**

156 A retrospective, temporal, spatial, and space-time scan statistic was utilized to  
157 identify locations and periods with higher-than-expected seroprevalence of SARS-

158 CoV-2 antibodies using SaTScan software version 9.6 (28).

159       The smallest spatial scale was represented by the centroid of a county while the  
160 time unit was represented by the month and year of SARS-CoV-2 antibody testing.  
161 Because the data consisted of two possible outcomes, SARS-CoV-2 antibody positive  
162 and negative, a Bernoulli model (29) was used to estimate the relative risk and log-  
163 likelihood ratio. A circular scanning window for spatial (30) and a cylinder with a  
164 circular spatial base and height relating to time for space-time (31) were used to  
165 identify clusters with higher-than-expected SARS-CoV-2 antibodies. The scanning  
166 window was set to include 50% of the population and/or 50% of the time at risk. A  
167 simulated p-value of  $\leq 0.05$  after 999 replications using a Monte Carlo simulation  
168 identified significant clusters. Relative risks of counties included within the  
169 significant space and space-time clusters were calculated and illustrated in maps to  
170 avoid the assumption that the relative risk of seroprevalence is identical throughout a  
171 significant cluster.

## 172 **RESULTS**

### 173 **Seroprevalence and distribution of seropositivity of cats across seasons, genders,** 174 **ages, and breeds**

175       From October 2021 to May 2023, a total of 1715 household cat serums from 63  
176 counties in Illinois were tested for SARS-CoV-2 specific antibodies using bELISA.  
177 The result showed that 244 (14% of 1715) cats were detected as having specific



---

178 antibodies against SARS-CoV-2 (**Table S1**). The results of those 244 positive samples  
179 were further confirmed in Lumit™ Dx SARS-CoV-2 Immunoassay and virus  
180 neutralizing test.

181 The distribution of seropositivity of cats across season, gender, age, and breed is  
182 presented in **Table 1**. Kittens (< 1-year-old) were 29.63% positive, followed by Junior  
183 (1-2 years old), 22.22% positive, Adults (3-6 years old) 18.12% positive, Seniors (10–  
184 19 years old), 15.36% positive, and Geriatric (>15 years old), 11.5% have the lowest  
185 rate of test positivity. Winter, 2021 had the lowest positive rate (n=17, 6.85% of 248)  
186 among all seasons.

187 We further performed a case-case multivariable logistic regression analysis. The  
188 predicted marginal effects of the age and season impact on the probability of SARS-  
189 CoV2 antibodies presence in domestic cats are illustrated in **Figure 2**. The results  
190 showed that young cats had a higher probability of SARS-CoV-2 infection (OR=  
191 0.996; p=0.001) as the odds of seropositivity decreased when the age of cats increased.  
192 In addition, the third quarter of the year (OR=3.15; p<0.001) compared to the first  
193 quarter had the highest odds of a cat being seropositive. No significant associations  
194 were detected with breeds and sexes.

### 195 **Disease mapping**

196 We further analyzed the distribution of SARS-CoV-2 seroprevalence in domestic  
197 cats across Illinois counties. The county-level seroprevalence ranged from 0 to 100%  
198 (**Fig 3A**). The highest seroprevalence level was in DeKalb, Grundy, Kendall, and

---

199 White counties, with a 100% positive ratio. The lowest seroprevalence level was  
200 observed in 21 counties, including DeWitt, Woodford, Effingham, Wayne, and others,  
201 with a 0% positive ratio. In terms of the total number of tests among counties (**Table**  
202 **S1**), Champaign had the highest number of tests (n=659), followed by Cook (n=190),  
203 McLean (n=100), Sangamon (n=74), and Macon (n=62).

204 **Figure 3B** illustrates the spatial interpolation of the seroprevalence of SARS-  
205 CoV-2 antibodies in Illinois domestic cats using Empirical Bayesian Kriging analysis.  
206 Several regions in Illinois showed an increased seroprevalence, including northern  
207 and southern Illinois, with values ranging from 36.98 to 44.02.

#### 208 **Global and local spatial cluster analysis**

209 To determine the extent of clustering of high SARS-CoV2 antibodies in domestic  
210 cats across Illinois, global spatial clustering was assessed by using the Incremental  
211 Spatial Autocorrelation (Global Moran's I) Tool. As shown in **Figure 4**, one peak  
212 (corresponding to the maximum Z-score) was identified at 80.7 km. The high global  
213 clustering range suggests a widespread distribution of SARS-CoV2 antibodies in  
214 domestic cats across Illinois counties. This distance band and the "zone of  
215 indifference" conceptualization parameter were used for the local spatial cluster  
216 analysis to determine the global clustering of SARS-CoV2 antibodies (high and low  
217 seroprevalence regions). The Hot Spot (Getis-Ord  $G_i^*$ ) analysis identified 9 counties  
218 in northern Illinois with high seroprevalence (hot spots), including LaSalle, Kendall,  
219 Grundy, and Kankakee (P-value=0.01), DuPage and Cook (P-value=0.05), DeKalb,

---

220 Kane, and Will (P-value=0.10) (**Fig 5**). In addition, in southern Illinois, Williamson  
221 County was also identified as a hot spot (P-value=0.10). A large cold spot (counties  
222 with low seroprevalence surrounded by counties with low seroprevalence) was  
223 identified in central Illinois that included 7 counties (Logan, De Witt, Macon,  
224 Christian, Shelby, Moultrie, and Effingham County, P-value=0.10).

### 225 **Temporal, spatial, and space-time scan statistic analysis**

226 The results of the temporal, spatial, and space-time scan statistics are presented  
227 in **Table 2**. A single temporal cluster was identified between June and November 2022,  
228 where cats showed higher-than-expected seropositivity for SARS-CoV-2 antibodies.  
229 Two spatial clusters ( $p < 0.05$ ) where cats revealed a higher-than-expected -  
230 seroprevalence were detected by using the discrete Bernoulli model (**Fig 6A, Table 2**).  
231 The primary cluster (SP Cluster 1) was located in northeastern Illinois and included 3  
232 counties (Livingston, Ford, and Grundy) and contained 9 seropositive cases (60% of  
233 15). The second spatial cluster (SP Cluster 2) included 7 northern Illinois counties  
234 (Jackson, Perry, Williamson, Washington, Jefferson, Saline, and St. Clair), and  
235 contained 12 seropositive cases (42.9% of 28). The relative risk within the significant  
236 clusters ranged from 0 to 7.05.

237 The space-time analysis using the Bernoulli model identified three significant  
238 ( $p < 0.05$ ) clusters of cats with higher-than-expected SARS-CoV-2 antibodies (**Fig 6B,**  
239 **Table 2**). The primary cluster (ST Cluster 1) occurred between June 2022 and  
240 September 2022 in the northeastern part of Illinois (RR = 4.80) and contained 8

---

241 counties (Kankakee, Will, Iroquois, Grundy, Livingston, Ford, Kendall, Cook). The  
242 second cluster (ST Cluster 2) occurred between July 2022 and October 2022 in the  
243 southern part of Illinois (RR = 2.10) and contained 5 counties (Washington, Clinton,  
244 Perry, Jefferson, St. Clair). The last cluster (ST Cluster 3) occurred between July 2022  
245 and October 2022 in the central-eastern part of Illinois (RR = 7.18) and contained 5  
246 counties (Edgar, Clark, Douglas, Coles, Vermilion, Cumberland, Champaign). The  
247 relative risk within the significant space-time clusters ranged from 0 to 7.13.

248 **Comparing the seroprevalence of SARS-CoV-2 in cats with the SARS-CoV-2**  
249 **infections in humans at Illinois**

250       During the 2021-2023 period, the prevalence of SARS-CoV-2 infections in both  
251 humans and cats in Illinois, United States, exhibited notable trends. We assessed the  
252 potential correlation of SARS-CoV-2 seroprevalence in cats with that of human cases.  
253 As shown in the kinetic curve for time course monitoring of antibody response (**Fig 7**),  
254 the seroprevalence of SARS-CoV-2 antibody-positive cats reached several peaks, in  
255 December 2021, March 2022, April 2022, July 2022, September 2022, October 2022,  
256 January 2023, and March 2023. Compared to the reported SARS-CoV-2 positive  
257 human cases (nucleic acid-based test), the first SARS-CoV2 antibody prevalence peak  
258 in cats overlapped with the human SARS-CoV2 RNA-positive peak from December  
259 2021 to January 2022, while the second SARS-CoV2 antibody prevalence peak in  
260 cats appeared about one month after the human positive peak. For the rest of the

261 period, no similarity was found between the positive rates of human and cat cases.

## 262 **DISCUSSION**

263 SARS-CoV-2 is known to infect humans and certain animal species. Studies  
264 have demonstrated that cats are highly susceptible to SARS-CoV-2 under both  
265 experimental and natural infection conditions (32, 33). Given that domestic cats often  
266 live close to their human caretakers and have opportunities to interact with other  
267 animals, they may contribute to the ongoing evolution of SARS-CoV-2 (34).

268 We performed serological surveillance of SARS-CoV-2 antibody prevalence in  
269 Illinois domestic cats during 2021-2023. Initially, we used the bELISA to screen all  
270 the serum samples collected during the study period. For the bELISA positive samples,  
271 we used two serological assays (Promega Lumit™ Dx SARS-CoV-2 Immunoassay  
272 and virus neutralization assay) to confirm the results. Nine samples were showing  
273 inconsistent results, which were excluded from the subsequent analysis. The  
274 inconsistent results might be due to the different targets between different assays. Our  
275 bELISA is targeted for antibodies specific for viral nucleocapsid protein, while Lumit  
276 and virus neutralization assays are designed for testing antibodies response against  
277 viral spike protein. On the other hand, the sample quality and test sensitivity could  
278 affect the results. Two of the cat serum samples were hemolyzed, which may cause  
279 high background in bELISA test and generate false positive results. Nevertheless, we  
280 also performed the analysis with the inclusion of those 9 samples, the results did not

---

281 change our conclusions.

282 To better understand the demographic characteristics of those cats having SARS-  
283 CoV-2 specific antibodies, we utilized a case-case multivariable logistic regression  
284 analysis to compare the odds of positivity considering seasonality, gender, and age  
285 factors. We found that the odds of a cat testing positive for SARS-CoV-2 antibodies  
286 decreased as the age increased, with younger cats having the highest while older cats  
287 had the lowest seroprevalence, which is opposite to age-related human SARS-CoV2  
288 risks. In human cases, there is an age-related disparity in the prevalence and severity  
289 of SARS-CoV-2 infection, in which older people have a higher infection risk due to  
290 weaker immune systems. Our study showed the opposite tendency in cats. Young cats  
291 have an immature adaptive immune response (35), which may cause them more  
292 susceptible to infections. Future studies are needed to elucidate the in-depth  
293 mechanisms that cause the difference in seroprevalence among the age groups of cats.

294 To characterize the distribution of SARS-CoV-2 antibodies in Illinois cats, we  
295 applied a stepwise analysis that combined both spatial and conventional statistical  
296 methods with Geographic Information Systems (GIS). As the first step of spatial  
297 analysis, we constructed disease maps to visualize the geographic distribution of  
298 SARS-CoV-2 infections across Illinois's 63 counties. When evaluating the  
299 seroprevalence level, we calculated the proportion of positive samples collected from  
300 each county across Illinois. One limitation of our approach was that not all Illinois  
301 counties were included because from some counties we did not receive samples. To

---

302 mitigate this issue, we constructed an isopleth map by spatially interpolating the  
303 seroprevalence using the empirical Bayesian Kriging method (36). The results  
304 identified areas with high seroprevalence levels of SARS-CoV-2 antibodies in Illinois  
305 household cats. However, we found that the distribution of seroprevalence was not  
306 even within different counties. In the northern and southern regions of Illinois, the  
307 seroprevalence was higher than in other regions. The northern region contains LaSalle,  
308 Kendall, Grundy, Kankakee, DuPage, Cook, DeKalb, Kane, and Will counties. This  
309 region has the highest human population density in Illinois, which includes the city of  
310 Chicago in Cook County, and based on the size of its population, it has the highest  
311 estimated number of household cats in Illinois. The southern region in Illinois also  
312 displayed a high seroprevalence in both choropleth and isopleth maps. However, this  
313 region has a low population density and a low estimated number of cats, and fewer  
314 samples were collected from this region (Table S1), which might overestimate the  
315 seroprevalence.

316       The Incremental Spatial Autocorrelation (Global Moran's I) Tool was utilized to  
317 examine the global clustering of antibody seroprevalence over ten increasing distance  
318 bands. This evaluation of global spatial autocorrelation considered both county  
319 locations and their seroprevalence. The concept of “zone of indifference” was used for  
320 the analysis, which implies that all counties within a specific distance band receive the  
321 maximum weighting, and beyond this distance, the level of influence experiences a  
322 rapid decline in weighting as the distance increases (37, 38). The highest Moran's I

---

323 Index value, z-score, and p-value were observed at a distance of 80 km, suggesting  
324 that SARS-CoV-2 infections were widespread in several areas across Illinois.

325 We used the Hot Spot Analysis (Getis-Ord  $G_i^*$ ) during the second stage of our  
326 spatial analysis. This method identifies areas with high seroprevalence (hot spots; a  
327 county with a high seroprevalence surrounded by counties with high seroprevalence)  
328 and also detects areas with low seroprevalence (cold spots; a county with low  
329 seroprevalence surrounded by counties with low rates) (39). As presented in the  
330 hot/cold spot map, northern Illinois, including LaSalle, Kendall, Grundy, Kankakee,  
331 DuPage, Cook, DeKalb, Kane, and Will counties, and southern Illinois containing  
332 Williamson County were recognized as statistically significant hot spots, which is  
333 consistent with our previous disease mapping results. Similarly to our previous results,  
334 central Illinois was identified as a cold-spot area where cat samples submitted from  
335 these counties had a low seroprevalence. As a limitation of our analysis, some regions  
336 included counties with low tested sample volumes, and the calculated seroprevalences  
337 become unreliable and very high if several positive cases were detected in these  
338 regions (40).

339 At the third stage of our spatial analysis, we utilized temporal, spatial, and space-  
340 time scan statistics to add extra information on the location and time frame of the  
341 distribution of seroprevalence of SARS-CoV-2 positive antibodies in Illinois  
342 household cats. First, we employed a purely spatial scan statistic, which presumes that  
343 the seroprevalence follows a Bernoulli distribution (i.e., SARS-CoV-2 antibody



344 detected in a cat in a county versus not detected). Two high seroprevalence spatial  
345 clusters were identified in the northeast region of Illinois, where 60% of the samples  
346 tested positive and southern region of Illinois, where 42.9% of the samples tested  
347 positive. These clusters overlapped with the area identified by the Hot Spot method.  
348 We also detected three high seroprevalence space-time clusters in the northeast,  
349 central-east, and southern regions of Illinois. Space-time cluster 1 (ST 1), occurring  
350 between June 2022 and September 2022, and space-time cluster 2 (ST 2), occurring  
351 between June 2022 and September 2022 were overlapping with the clusters detected  
352 by the spatial scan and Hot Spot analysis, highlighting the importance of these areas.  
353 The third space-time cluster (ST 3), which occurred between July 2022 and October  
354 2022) was detected in the central-eastern Illinois region. These space-time clusters  
355 beside the locations provided a time component, suggesting that there were peaks in  
356 seroprevalence that occurred during these periods.

357       Interestingly, there was a reported SARS-CoV-2 human infection peak that  
358 occurred in Illinois during December 2021-January 2022. In our study period, we  
359 detected the first cat seropositive peak in late December 2021, while the second cat  
360 seropositive peak appeared about one month after the human positive peak. We  
361 suspected that there might be some possible transmissions between humans and cats  
362 during that period. Especially, the second seropositive peak could be related to human  
363 SARS-CoV-2 infections because about 14 days after being infected with SARS-CoV-  
364 2, the antibody level is detectable by our serological testing method (10, 22),

365 suggesting a possible human-to-cat transmission. However, we did not find any  
366 similarity between the positive case rates of human infections and cat seropositivity  
367 for the rest of the study period (between March 2022 – May 2023). Future studies are  
368 warranted to follow up on this finding to assess the protentional transmission risk  
369 between humans and cats.

370 Before interpreting our study results, few limitations should be noted. The study  
371 population included all the cats treated at veterinary teaching hospitals located in the  
372 cities of Chicago and Urbana, and the number of samples received from these  
373 locations might be higher. However, Chicago is the largest city in Illinois and has the  
374 highest estimated number of cats which might mitigate this effect. In addition, based  
375 on serological data the time of seropositivity is dependent on the time of sample  
376 collection and without knowing the duration of seropositivity, the interpretation of  
377 temporal trends should be made with caution because the time of exposure and the  
378 time of seropositivity does not correlate. In conclusion, our analysis of SARS-CoV2  
379 antibody seroprevalence in Illinois domestic cats during 2021-2023 identified  
380 northeast and southwest Illinois regions with increased seroprevalence of SARS-CoV-  
381 2 antibodies among domestic cats, and this increase occurred between June and  
382 October 2022. The susceptibility of the cats to SARS-CoV-2 infection appeared to be  
383 related to the age and the time of the year. This information is helpful in aid health  
384 stakeholders to develop effective prevention and control measures.

385 **ACKNOWLEDGMENTS**

386 We thank Dr. Tony Vanden Bush from Promega for providing the Lumit™ Dx SARS-  
387 CoV-2 Immunoassay kits. This project was supported by the National Institute of  
388 Health [Grant #R01AI166791, to Y. Fang (PI) and D. Diel (MPI)].

389

390

---

391 **Figure 1. Map highlighting the study area.** Illinois is located in the midwestern

392 United States, which contains 103 counties.

393 **Figure 2. Effects of age and season on the seroprevalence of SARS-CoV-2**

394 **antibody detection in household cats in Illinois, 2021-2023.** Predicted marginal

395 effects calculated from a multivariable logistic regression model. Seropositivity

396 (yes/no) of cat serum samples (n=1715) as the outcome variable, while age and

397 season as predictor variables were included in the model.

398 **Figure 3. SARS-CoV-2 antibodies in Illinois household cats during 2021-2023. (A)**

399 Point map illustrating the distribution of seroprevalence by county. **(B)** Isopleth map

400 illustrating the distribution of seroprevalence across Illinois by using the Empirical

401 Bayesian kriging spatial interpolation method.

402 **Figure 4. Incremental spatial autocorrelation analysis for the seroprevalence of**

403 **SARS-CoV-2 antibodies in Illinois domestic cats.** Results of the Global Moran's I

404 statistic. The default incremental distance was selected as the starting distance that

405 signifies the average distance to each county's nearest neighboring centroid. The color

406 of each point on the graph corresponds to the statistical significance of the z-score

407 values. The peak signal is the distance where the spatial processes influencing

408 clustering is most evident. The zone of indifference conceptualization parameter was

409 used for the analysis. Statistically significant at  $p \leq 0.05$ .

410

---

411 **Figure 5. Hot spot analysis of the seroprevalence of SARS-CoV-2 antibodies in**

412 **Illinois household cats.** The Getis-Ord  $G_i^*$  statistic was applied to identify local  
413 clusters. Hot spots (red color) signify counties with high seroprevalence surrounded  
414 by high seroprevalence counties, while cold spots (blue color) signify counties with  
415 low seroprevalence surrounded by counties with low seroprevalence. A Euclidean  
416 distance band of 80.7 km, and the zone of indifference conceptualization parameter,  
417 were used for the analysis. Statistically significant at  $p \leq 0.05$ .

418 **Figure 6. Spatial and space-time clustering of seroprevalence of SARS-CoV-2**

419 **antibodies in Illinois household cats during 2021-2023.** (A) Purely spatial clusters  
420 of SARS-CoV-2 antibodies in Illinois household cats. The relative risk (RR) of  
421 counties within a spatial cluster where cats had higher than expected SARS-CoV-2  
422 antibodies is shown. The circle represents the location of the cluster. Within the circle,  
423 the color of each dot represents the value range of the RR rate in each county.

424 (B) Space-time clusters of SARS-CoV-2 antibodies in Illinois household cats.

425 Retrospective analysis, scanning for clusters with high seroprevalence, using 50%  
426 population at risk and 50 % period scanning window, 999 Montecarlo permutation,  
427 and the Bernoulli model. The circle represents the location of the cluster, and the  
428 period of the cluster is also represented. Within the cluster, the color of each dot  
429 represents the value range of the RR in each county. Statistically significant at  
430  $p \leq 0.05$ .

431 **Figure 7. Prevalence rates of SARS-CoV-2 infections in humans and domestic**  
432 **cats in Illinois during 2021-2022.** The weekly seropositive rate of Illinois domestic  
433 cats is shown in the orange line, while the weekly viral nucleic acid test positive rate  
434 of reported human cases is shown in the blue line. Note, the peak of human cases  
435 during January of 2022, followed by a set of peaks of cat cases starting on February  
436 2022 and continuing for the rest of the study period.

---

437 **REFERENCE**

- 438 1. Lu R, Zhao X, Li J, Niu P, Yang B, Wu H, et al. Genomic characterisation  
439 and epidemiology of 2019 novel coronavirus: implications for virus origins and  
440 receptor binding. *Lancet*. 2020 Feb 22;395(10224):565-74.
- 441 2. Hu B, Guo H, Zhou P, Shi ZL. Characteristics of SARS-CoV-2 and COVID-  
442 19. *Nat Rev Microbiol*. 2021 Mar;19(3):141-54.
- 443 3. Jackson CB, Farzan M, Chen B, Choe H. Mechanisms of SARS-CoV-2 entry  
444 into cells. *Nat Rev Mol Cell Biol*. 2022 Jan;23(1):3-20.
- 445 4. Pal M, Berhanu G, Desalegn C, Kandi V. Severe Acute Respiratory  
446 Syndrome Coronavirus-2 (SARS-CoV-2): An Update. *Cureus*. 2020 Mar  
447 26;12(3):e7423.
- 448 5. Britton P. Coronaviruses: General Features (Coronaviridae). In: Bamford DH,  
449 Zuckerman M, editors. *Encyclopedia of Virology (Fourth Edition)*. Oxford: Academic  
450 Press; 2019. p. 193-7.
- 451 6. Wu L, Chen Q, Liu K, Wang J, Han P, Zhang Y, et al. Broad host range of  
452 SARS-CoV-2 and the molecular basis for SARS-CoV-2 binding to cat ACE2. *Cell*  
453 *Discovery*. 2020 2020/09/29;6(1):68.
- 454 7. Zhou P, Yang XL, Wang XG, Hu B, Zhang L, Zhang W, et al. A pneumonia  
455 outbreak associated with a new coronavirus of probable bat origin. *Nature*. 2020  
456 Mar;579(7798):270-3.
- 457 8. Zhu N, Zhang DY, Wang WL, Li XW, Yang B, Song JD, et al. A Novel  
458 Coronavirus from Patients with Pneumonia in China, 2019. *New Engl J Med*. 2020  
459 Feb 20;382(8):727-33.
- 460 9. Soté WO, Franca EF, Hora AS, Comar M. A computational study of the  
461 interface interaction between SARS-CoV-2 RBD and ACE2 from human, cat, dog,  
462 and ferret. *Transbound Emerg Dis*. 2022;69(4):2287-95.
- 463 10. Martins M, do Nascimento GM, Nooruzzaman M, Yuan F, Chen C, Caserta  
464 LC, et al. The Omicron Variant BA.1.1 Presents a Lower Pathogenicity than B.1  
465 D614G and Delta Variants in a Feline Model of SARS-CoV-2 Infection. *J Virol*. 2022  
466 Sep 14;96(17):e0096122.
- 467 11. Sit THC, Brackman CJ, Ip SM, Tam KWS, Law PYT, To EMW, et al.  
468 Infection of dogs with SARS-CoV-2. *Nature*. 2020 Oct;586(7831):776-8.
- 469 12. Hale VL, Dennis PM, McBride DS, Nolting JM, Madden C, Huey D, et al.  
470 SARS-CoV-2 infection in free-ranging white-tailed deer. *Nature*. 2022  
471 Feb;602(7897):481-6.
- 472 13. Sharun K, Dhama K, Pawde AM, Gortázar C, Tiwari R, Bonilla-Aldana DK,  
473 et al. SARS-CoV-2 in animals: potential for unknown reservoir hosts and public  
474 health implications. *Vet Q*. 2021 Dec;41(1):181-201.
- 475 14. Halfmann PJ, Iida S, Iwatsuki-Horimoto K, Maemura T, Kiso M, Scheaffer  
476 SM, et al. SARS-CoV-2 Omicron virus causes attenuated disease in mice and

- 
- 477 hamsters. *Nature*. 2022 Mar;603(7902):687-92.
- 478 15. Sila T, Sunghan J, Laochareonsuk W, Surasombatpattana S, Kongkamol C,  
479 Ingviya T, et al. Suspected Cat-to-Human Transmission of SARS-CoV-2, Thailand,  
480 July-September 2021. *Emerg Infect Dis*. 2022 Jul;28(7):1485-8.
- 481 16. Oude Munnink BB, Sikkema RS, Nieuwenhuijse DF, Molenaar RJ, Munger  
482 E, Molenkamp R, et al. Transmission of SARS-CoV-2 on mink farms between  
483 humans and mink and back to humans. *Science*. 2021 Jan 8;371(6525):172-7.
- 484 17. Yen HL, Sit THC, Brackman CJ, Chuk SSY, Gu H, Tam KWS, et al.  
485 Transmission of SARS-CoV-2 delta variant (AY.127) from pet hamsters to humans,  
486 leading to onward human-to-human transmission: a case study. *Lancet*. 2022 Mar  
487 12;399(10329):1070-8.
- 488 18. Hedman HD, Krawczyk E, Helmy YA, Zhang L, Varga C. Host Diversity and  
489 Potential Transmission Pathways of SARS-CoV-2 at the Human-Animal Interface.  
490 *Pathogens (Basel, Switzerland)*. 2021;10(2).
- 491 19. Zhang Q, Zhang H, Gao J, Huang K, Yang Y, Hui X, et al. A serological  
492 survey of SARS-CoV-2 in cat in Wuhan. *Emerging Microbes & Infections*.  
493 2020;9(1):2013-9.
- 494 20. Michelitsch A, Hoffmann D, Wernike K, Beer M. Occurrence of Antibodies  
495 against SARS-CoV-2 in the Domestic Cat Population of Germany. *Vaccines (Basel)*.  
496 2020;8(4).
- 497 21. Oliveira A, Pereira MA, Mateus TL, Mesquita JR, Vala H. Seroprevalence of  
498 SARS-CoV-2 in Client-Owned Cats from Portugal. *Vet Sci*. 2022;9(7).
- 499 22. Yuan F, Chen C, Covalada LM, Martins M, Reinhart JM, Sullivan DR, et al.  
500 Development of monoclonal antibody-based blocking ELISA for detecting SARS-  
501 CoV-2 exposure in animals. *bioRxiv*. 2023:2023.03. 11.532204.
- 502 23. Yuan F, Chen C, Covalada LM, Martins M, Reinhart JM, Sullivan DR, et al.  
503 Development of monoclonal antibody-based blocking ELISA for detecting SARS-  
504 CoV-2 exposure in animals. *mSphere*. 2023;. Inpress.
- 505 24. Jenks GF, Caspall FC. Error on Choroplethic Maps: Definition, Measurement,  
506 Reduction. *Annals of the Association of American Geographers*. 1971  
507 1971/06/01;61(2):217-44.
- 508 25. Krivoruchko K. Empirical bayesian kriging. *ArcUser Fall*. 2012;6(10):1145.
- 509 26. Grekousis G. *Spatial Analysis Methods and Practice: Describe – Explore –*  
510 *Explain through GIS*. Cambridge: Cambridge University Press; 2020.
- 511 27. Getis A, Ord JK. The Analysis of Spatial Association by Use of Distance  
512 Statistics. In: Anselin L, Rey SJ, editors. *Perspectives on Spatial Data Analysis*. Berlin,  
513 Heidelberg: Springer Berlin Heidelberg; 2010. p. 127-45.
- 514 28. Kulldorff M. *SaTScan User Guide*; 2018. Reference Source. 2022.
- 515 29. Kulldorff M, Nagarwalla N. Spatial disease clusters: detection and inference.  
516 *Stat Med*. 1995 Apr 30;14(8):799-810.
- 517 30. Kulldorff M. A spatial scan statistic. *Communications in Statistics-Theory*



- 
- 518 and methods. 1997;26(6):1481-96.
- 519 31. Kulldorff M, Athas WF, Feurer EJ, Miller BA, Key CR. Evaluating cluster  
520 alarms: a space-time scan statistic and brain cancer in Los Alamos, New Mexico. *Am*  
521 *J Public Health*. 1998 Sep;88(9):1377-80.
- 522 32. Gaudreault NN, Trujillo JD, Carossino M, Meekins DA, Morozov I, Madden  
523 DW, et al. SARS-CoV-2 infection, disease and transmission in domestic cats.  
524 *Emerging Microbes & Infections*. 2020 2020/01/01;9(1):2322-32.
- 525 33. Izes AM, Yu J, Norris JM, Govendir M. Current status on treatment options  
526 for feline infectious peritonitis and SARS-CoV-2 positive cats. *The Veterinary*  
527 *Quarterly*. 2020;40(1):322-30.
- 528 34. El-Tholoth M, Hussein M, Mohammed D, Al-Rasheedi M, Al-Qubaisi H, Al-  
529 Blooshi A, et al. Serological Investigation on the Presence of Feline Coronavirus  
530 (FCoV) and Severe Acute Respiratory Syndrome Coronavirus 2 (SARS-CoV-2) in  
531 Domestic Cats Living with COVID-19 Positive Owners in the UAE, 2022. *Animals*.  
532 2023;13(3):493.
- 533 35. VIII - IMMUNOLOGY OF THE CAT. In: Pastoret P-P, Griebel P, Bazin H,  
534 Govaerts A, editors. *Handbook of Vertebrate Immunology*. San Diego: Academic  
535 Press; 1998. p. 289-335.
- 536 36. Yudhanto S, Varga C. Knowledge and Attitudes of Small Animal  
537 Veterinarians on Antimicrobial Use Practices Impacting the Selection of  
538 Antimicrobial Resistance in Dogs and Cats in Illinois, United States: A Spatial  
539 Epidemiological Approach. *Antibiotics*. 2023;12(3):542.
- 540 37. Anselin L. Local indicators of spatial association—LISA. *Geographical*  
541 *analysis*. 1995;27(2):93-115.
- 542 38. Mitchel A. *The ESRI Guide to GIS analysis, Volume 2: Spartial*  
543 *measurements and statistics*: ESRI press; 2005.
- 544 39. Varga C, John P, Cooke M, Majowicz SE. Spatial and space-time clustering  
545 and demographic characteristics of human nontyphoidal *Salmonella* infections with  
546 major serotypes in Toronto, Canada. *PLOS ONE*. 2020;15(7):e0235291.
- 547 40. Varga C, Pearl DL, McEwen SA, Sargeant JM, Pollari F, Guerin MT. Area-  
548 level global and local clustering of human *Salmonella* Enteritidis infection rates in the  
549 city of Toronto, Canada, 2007-2009. *BMC Infect Dis*. 2015;15:359.

550

# Counties in Illinois, United States of America

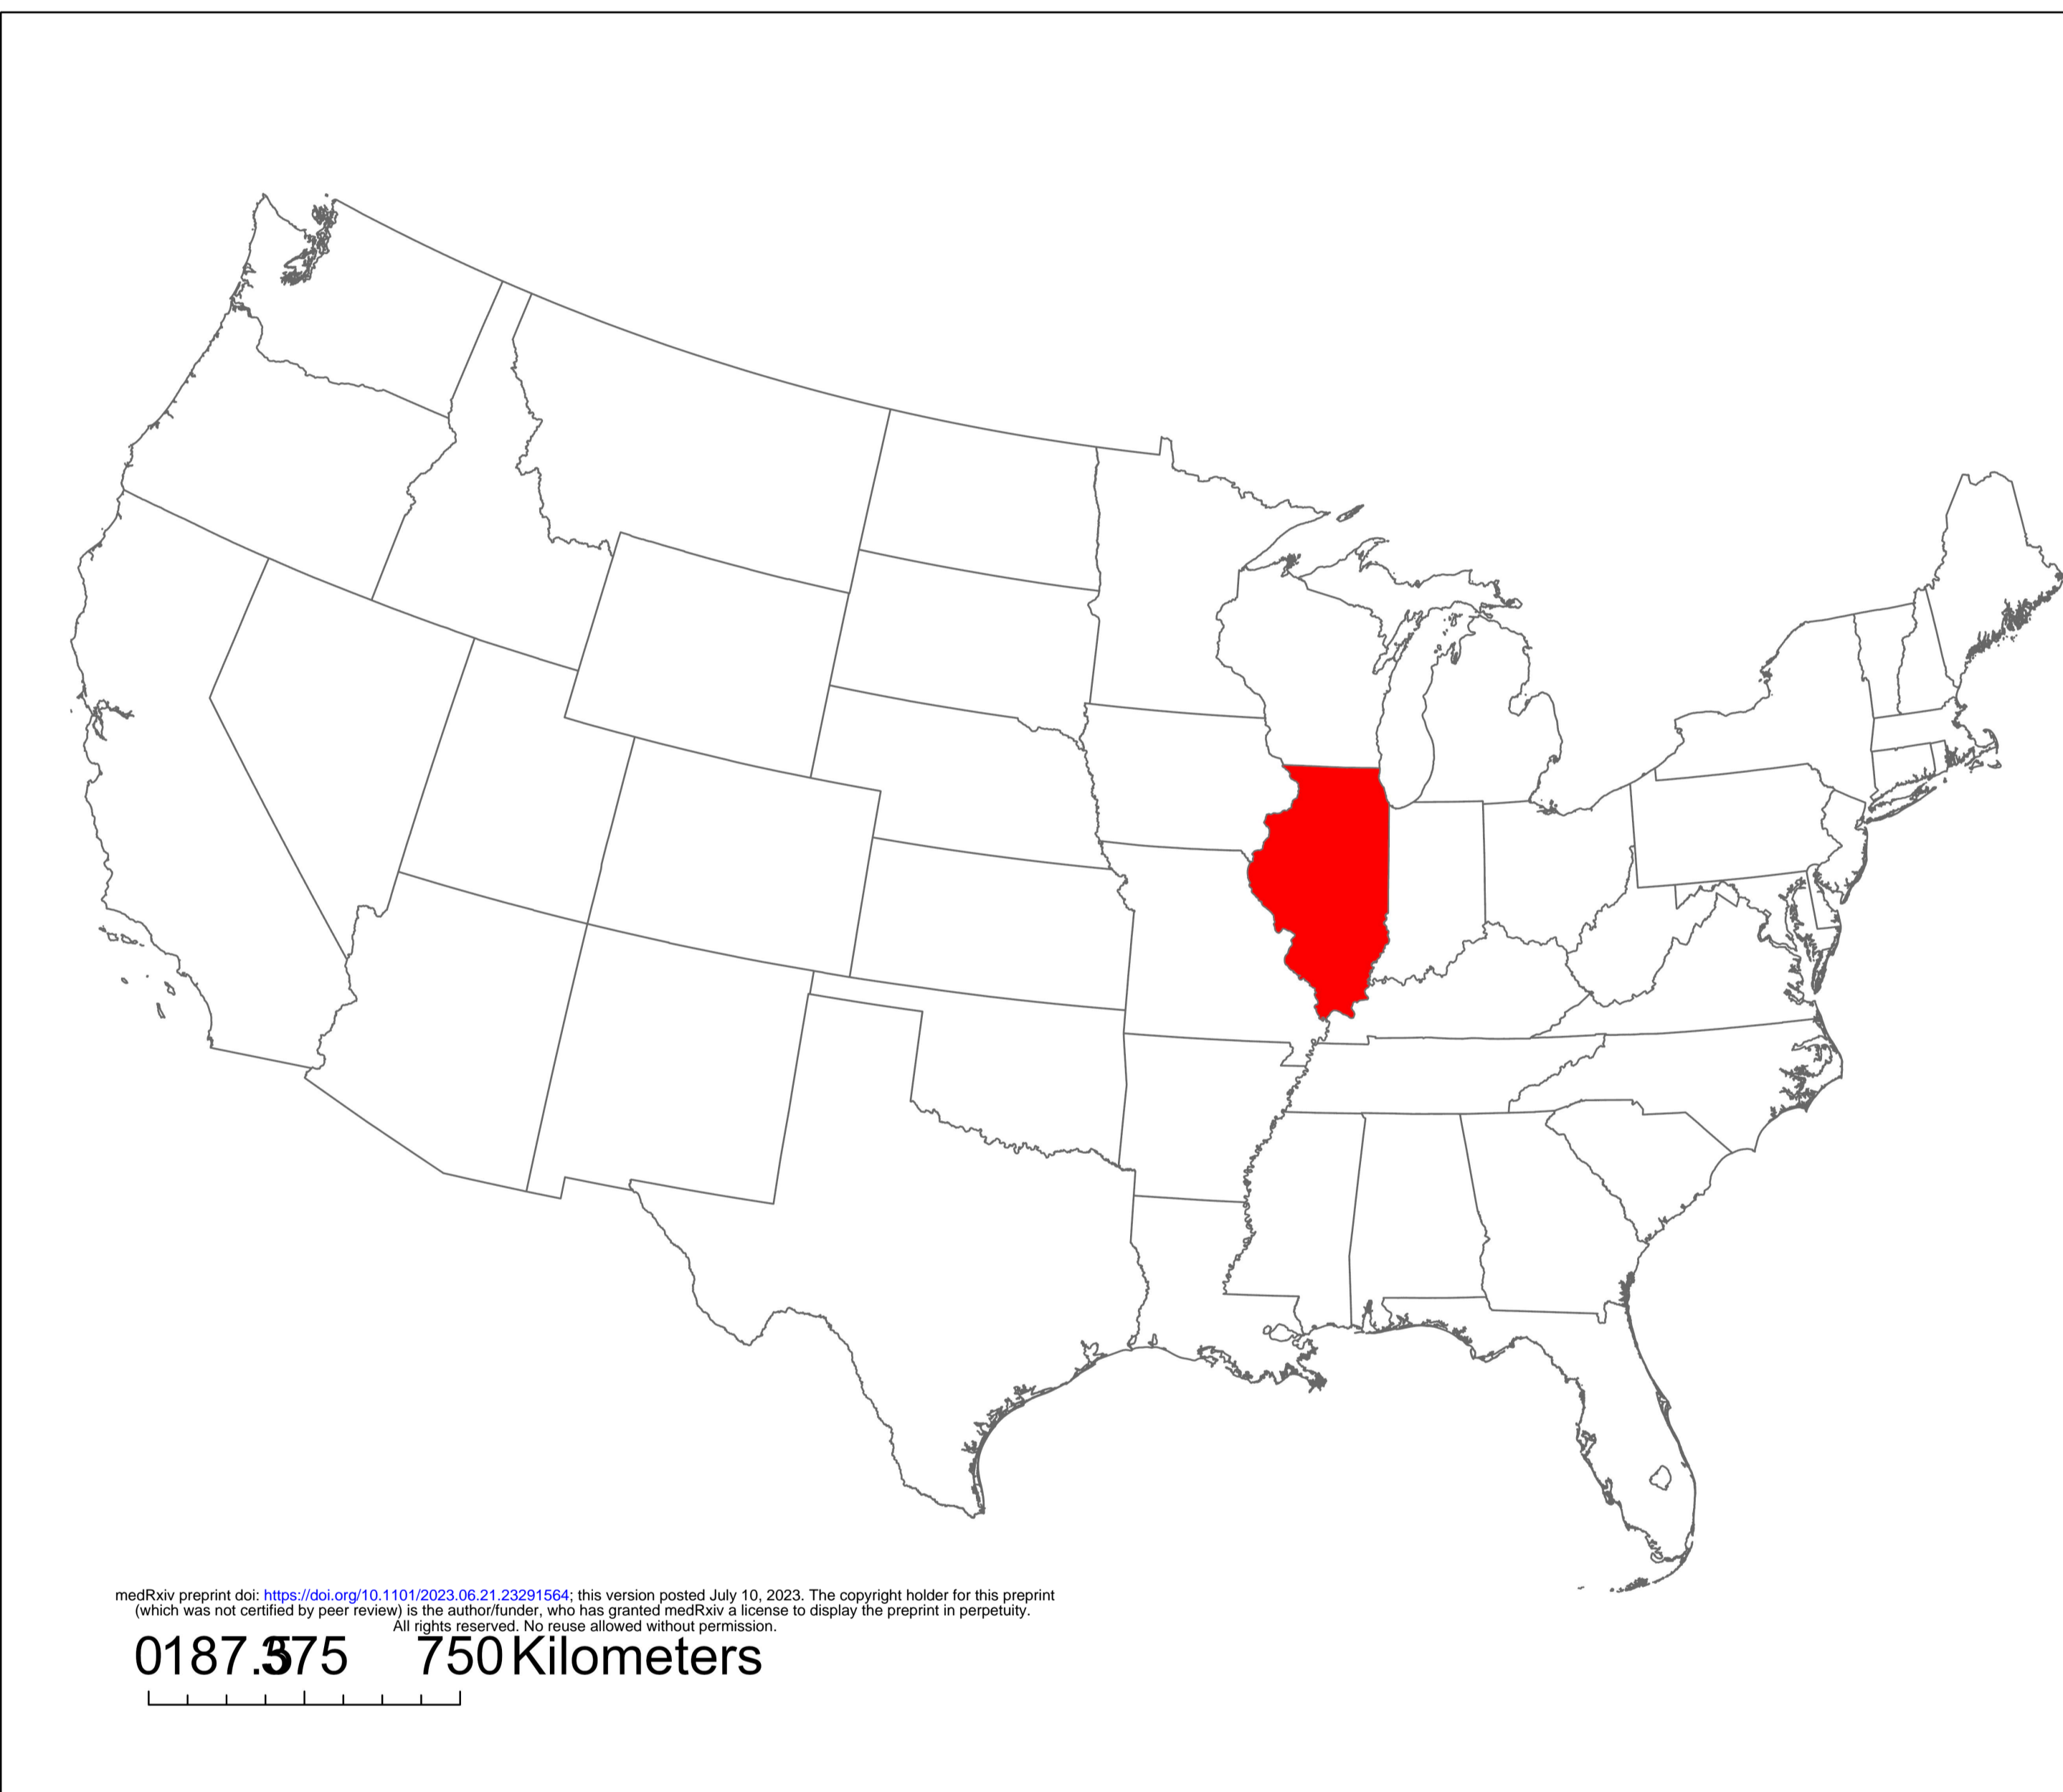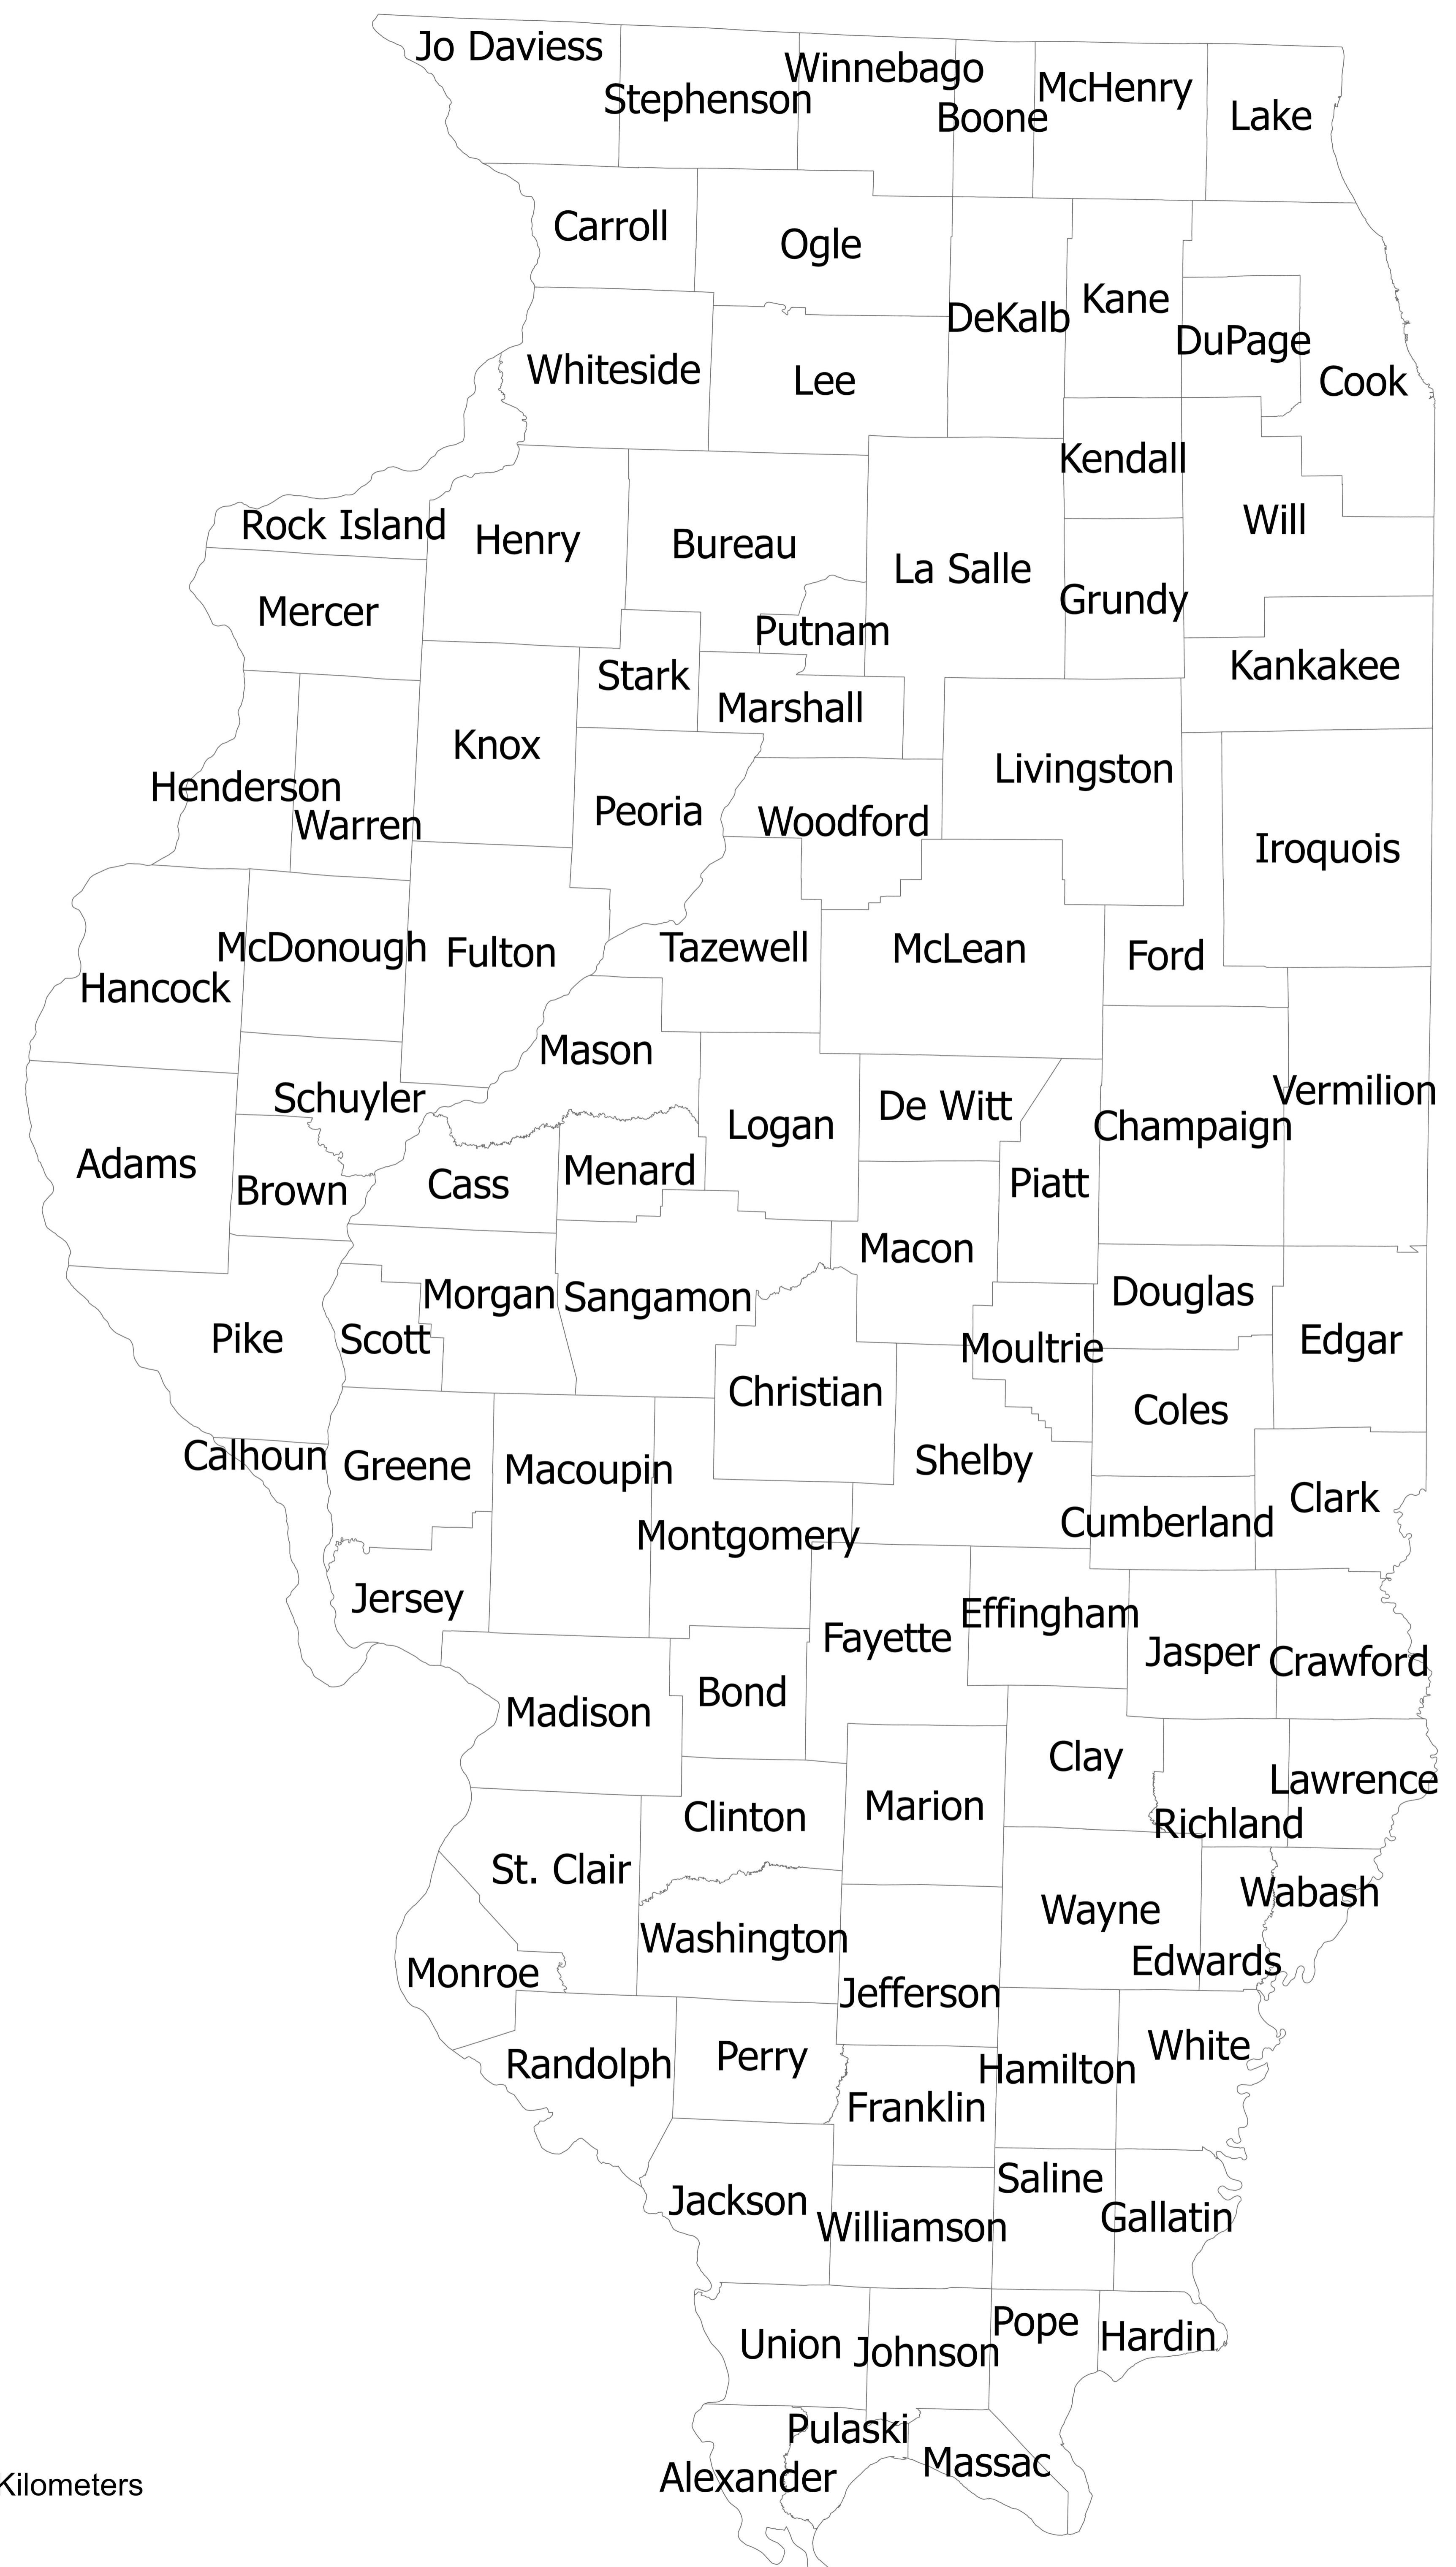

0 12.525 50 Kilometers

N

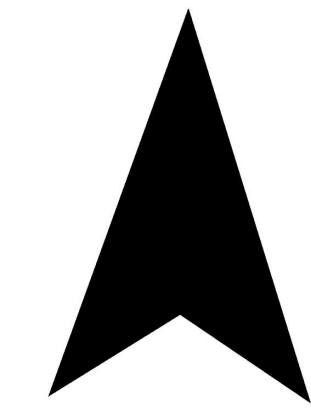

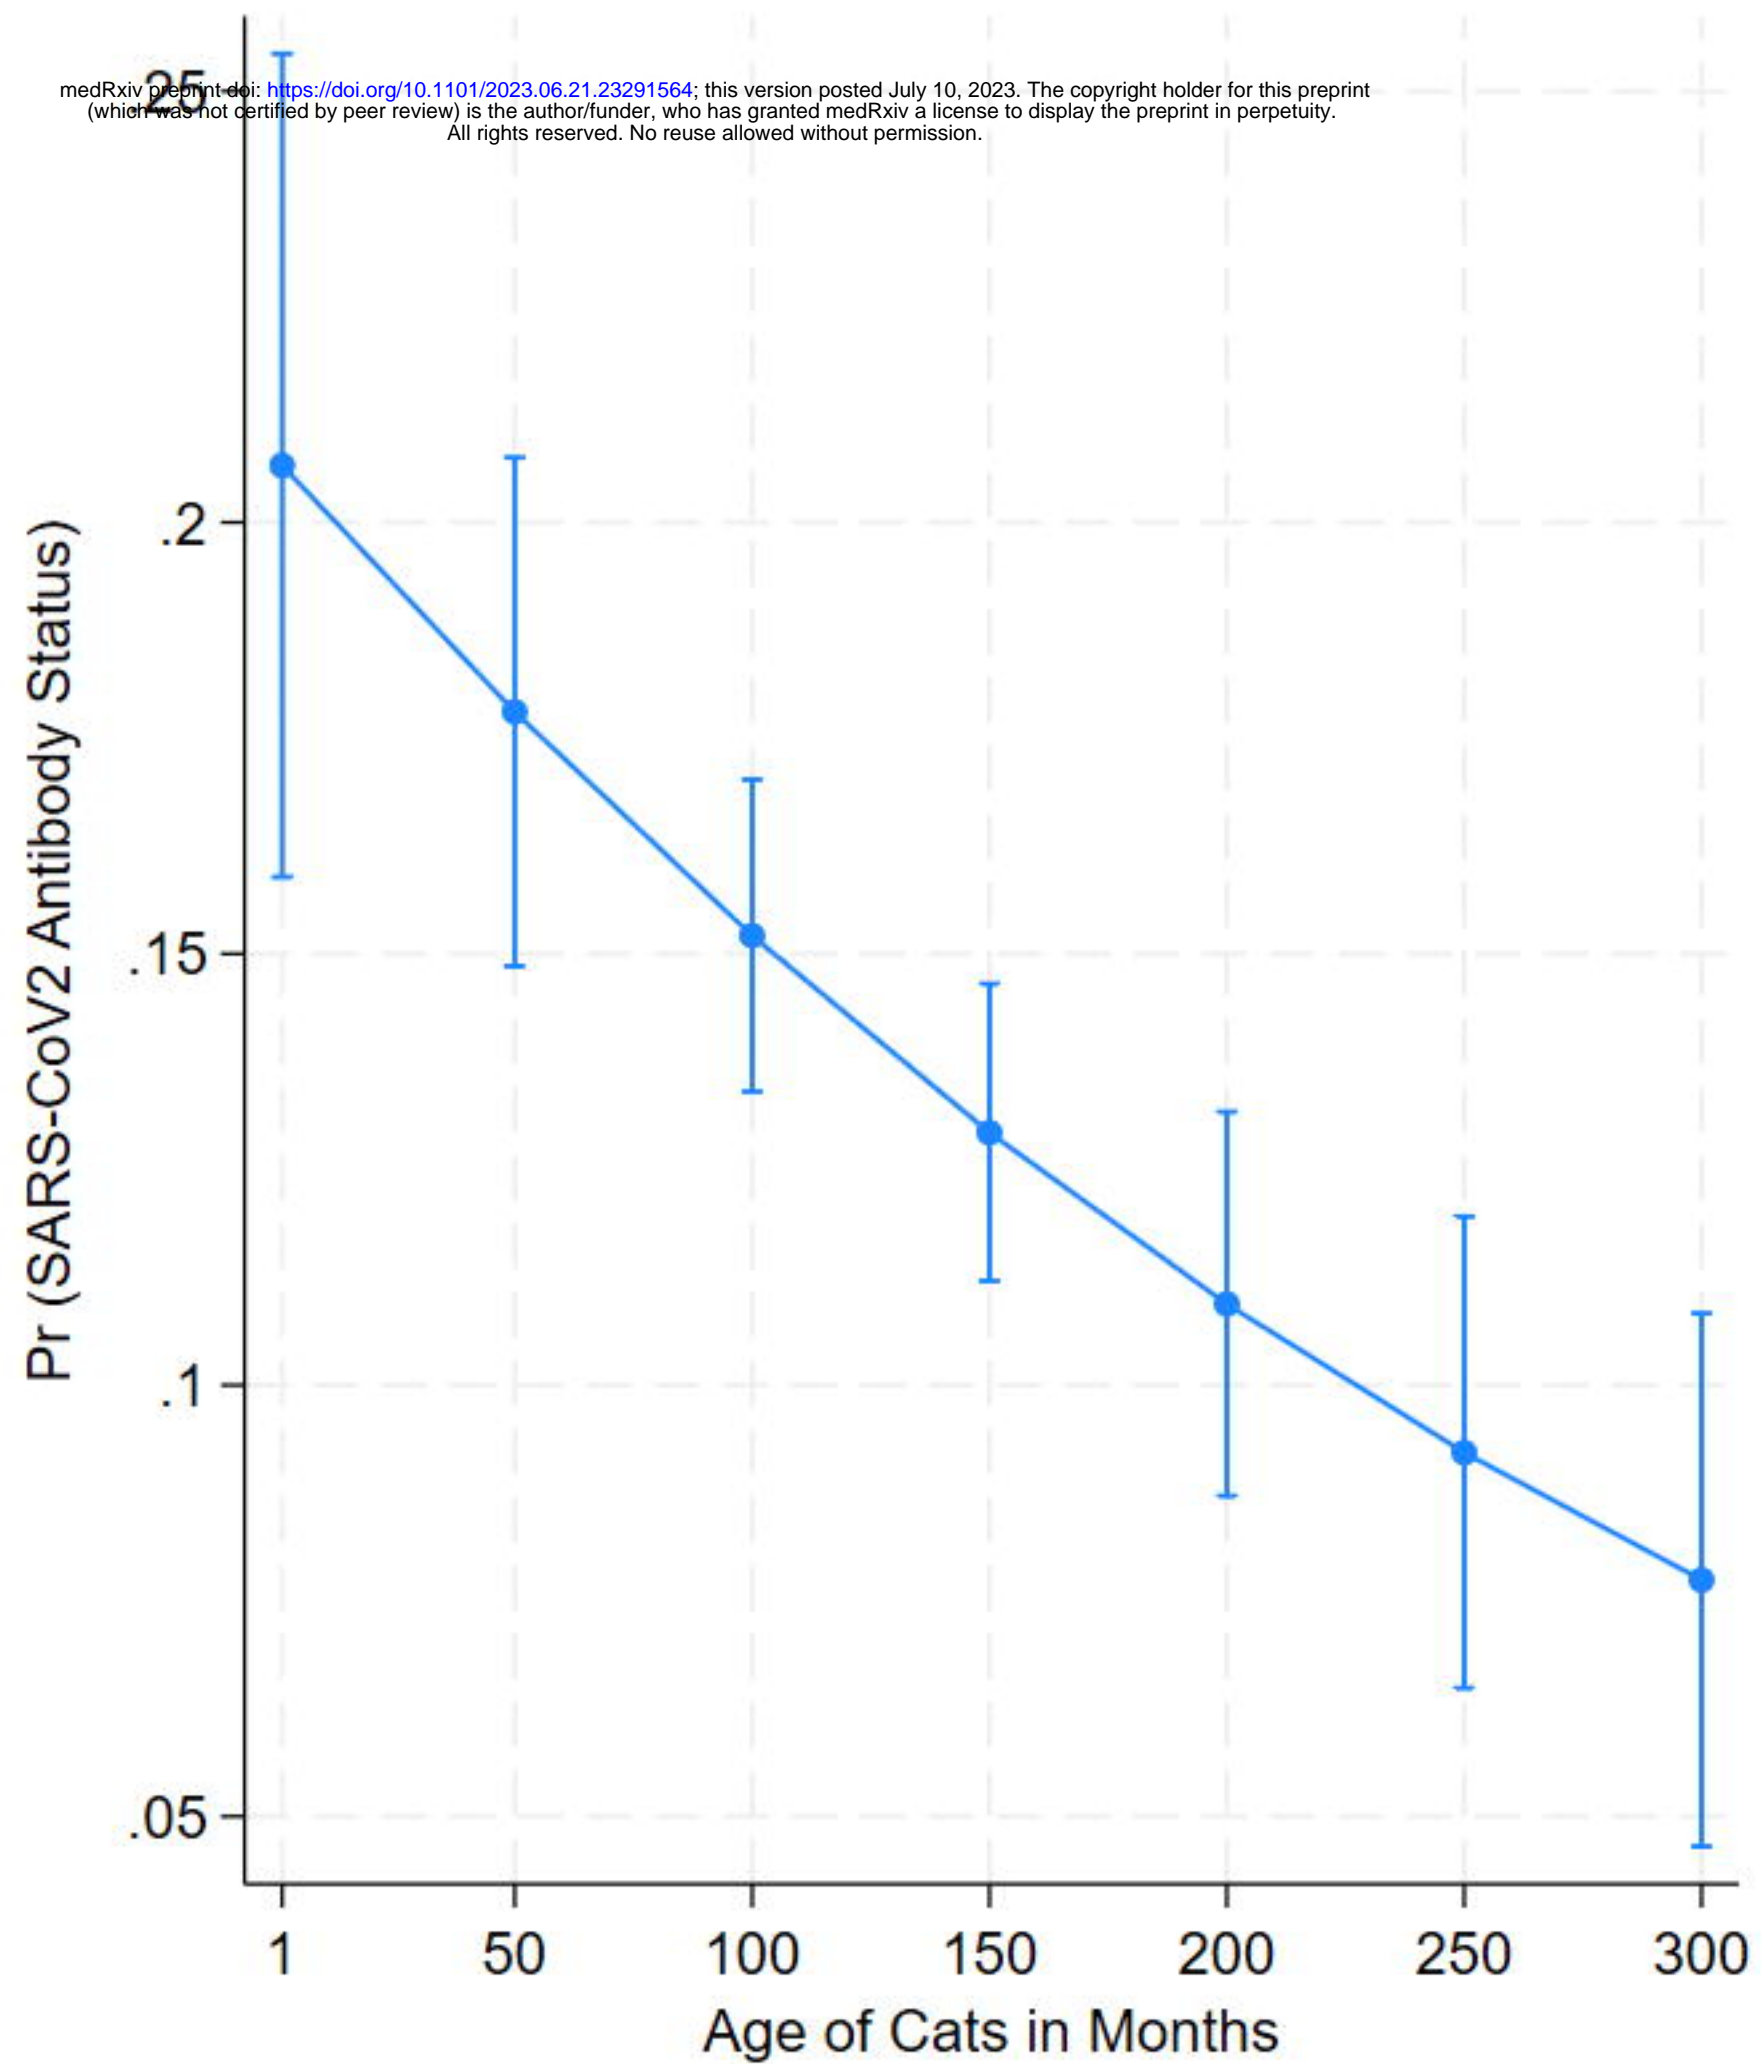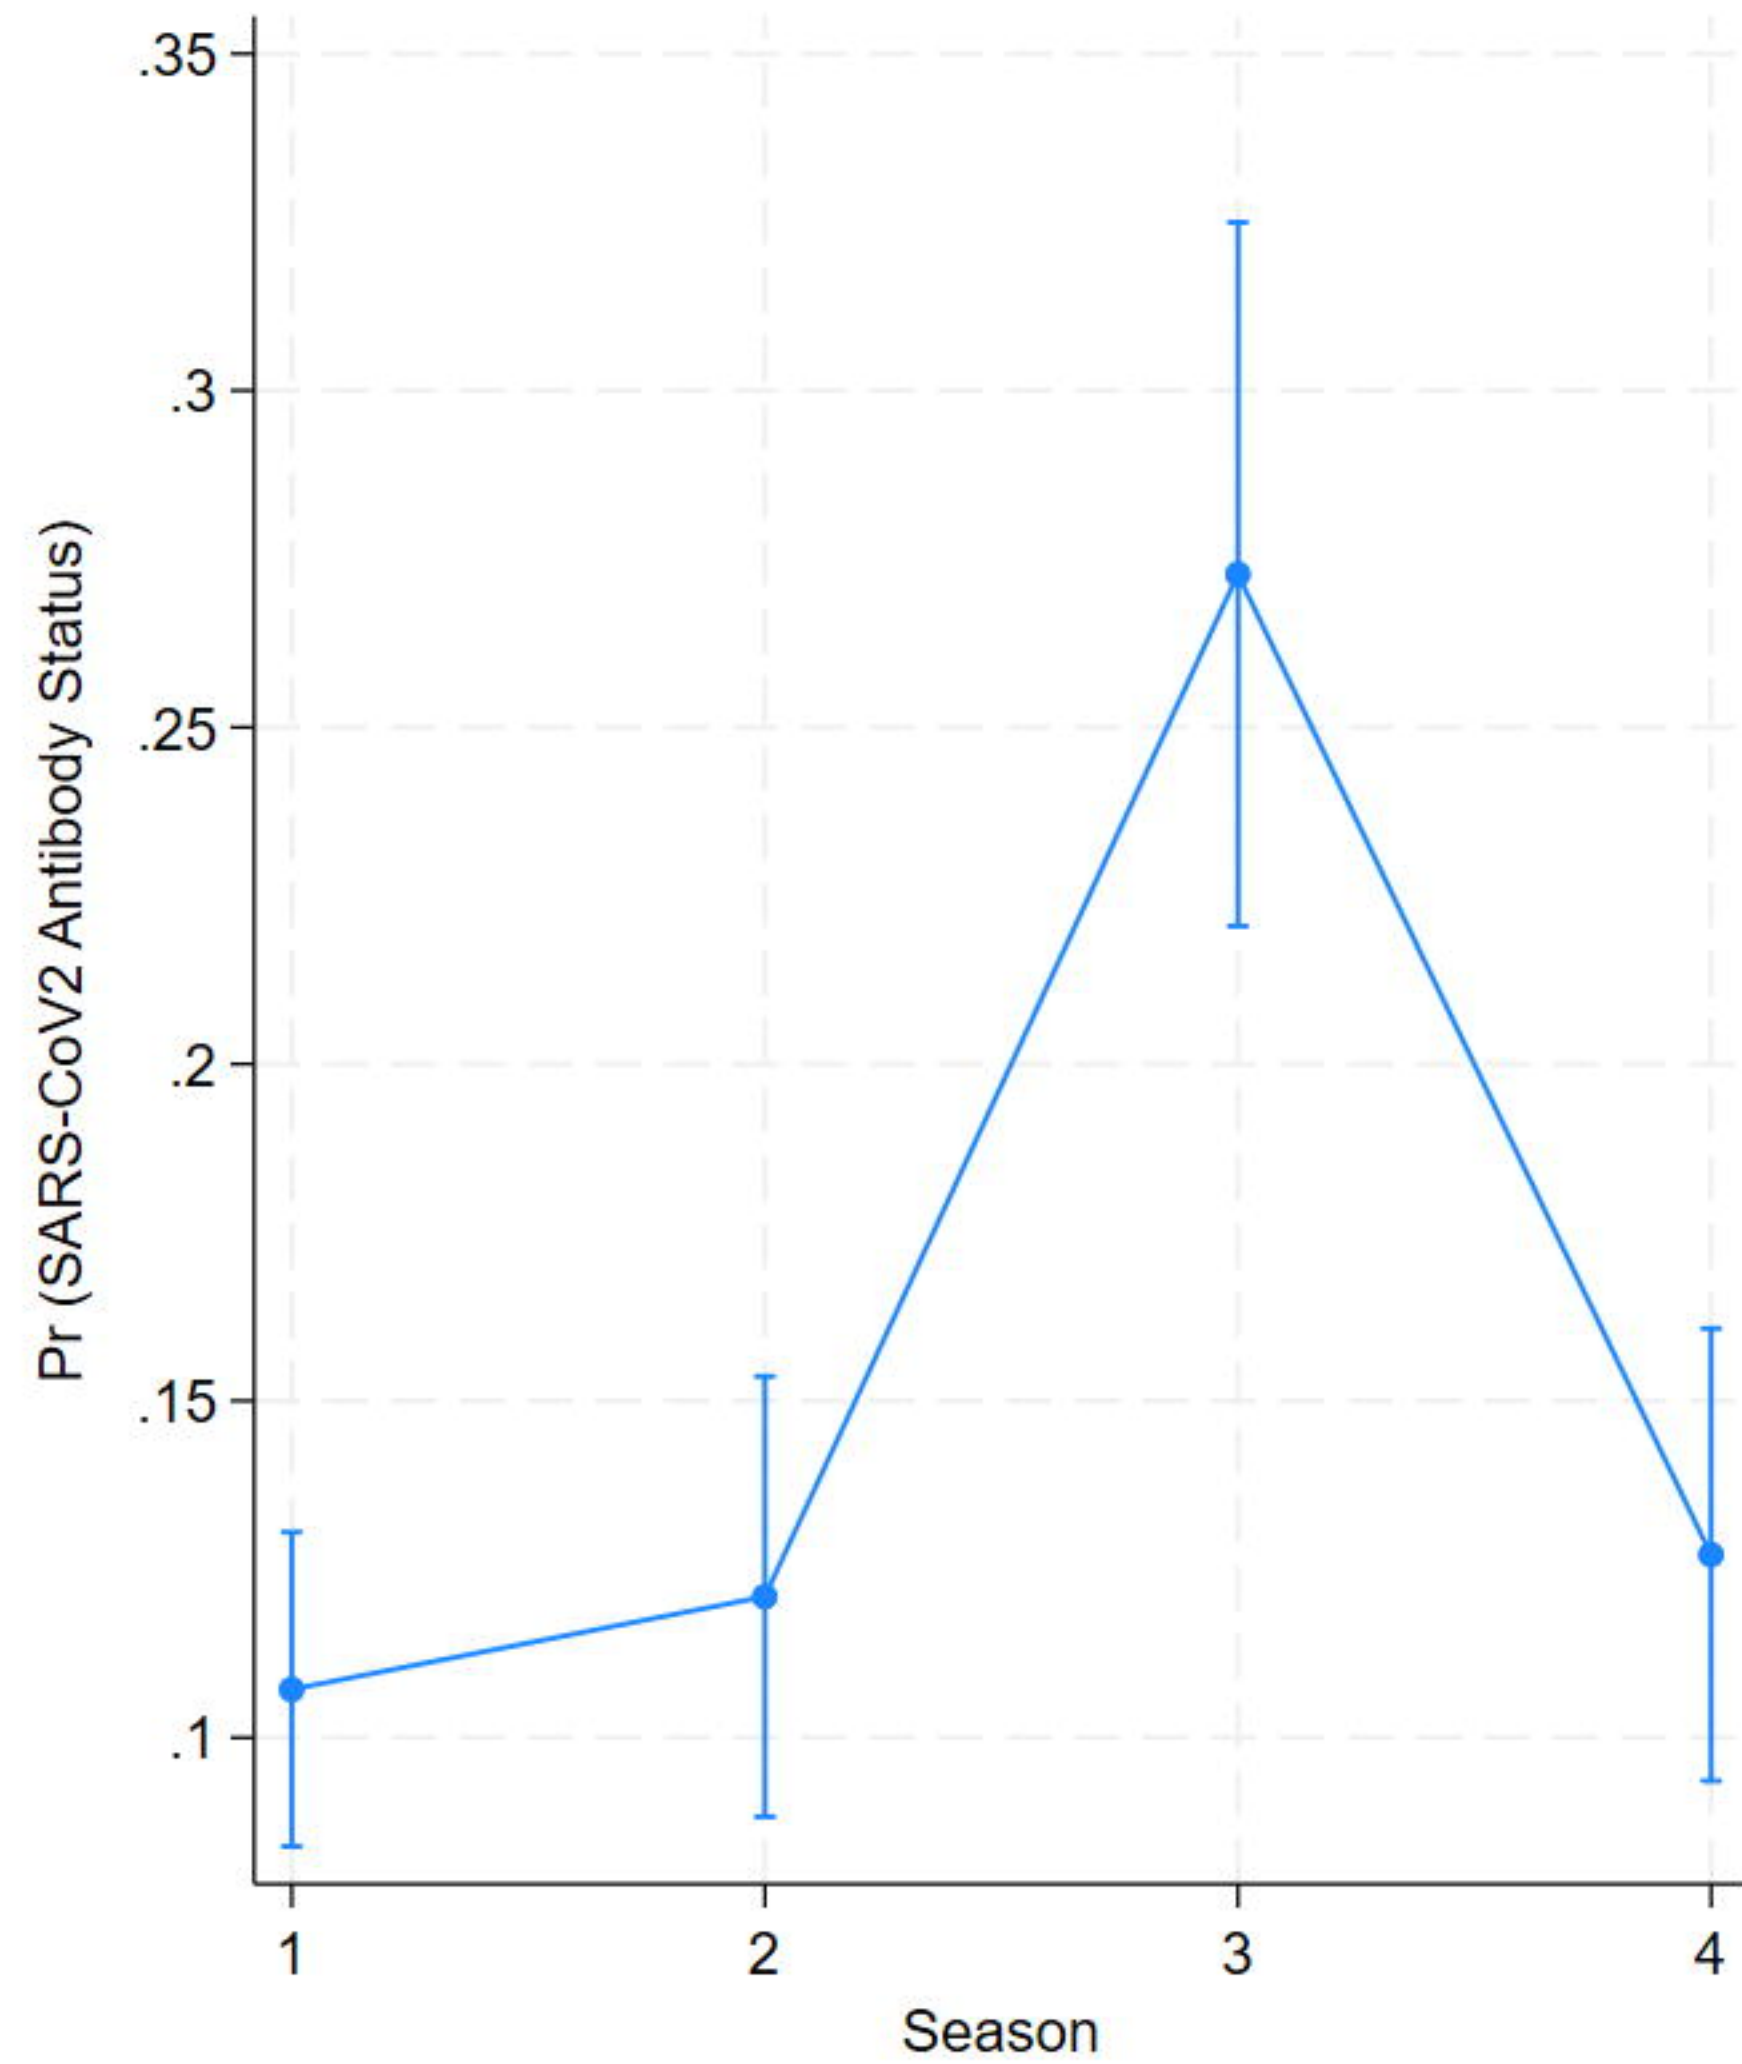

A

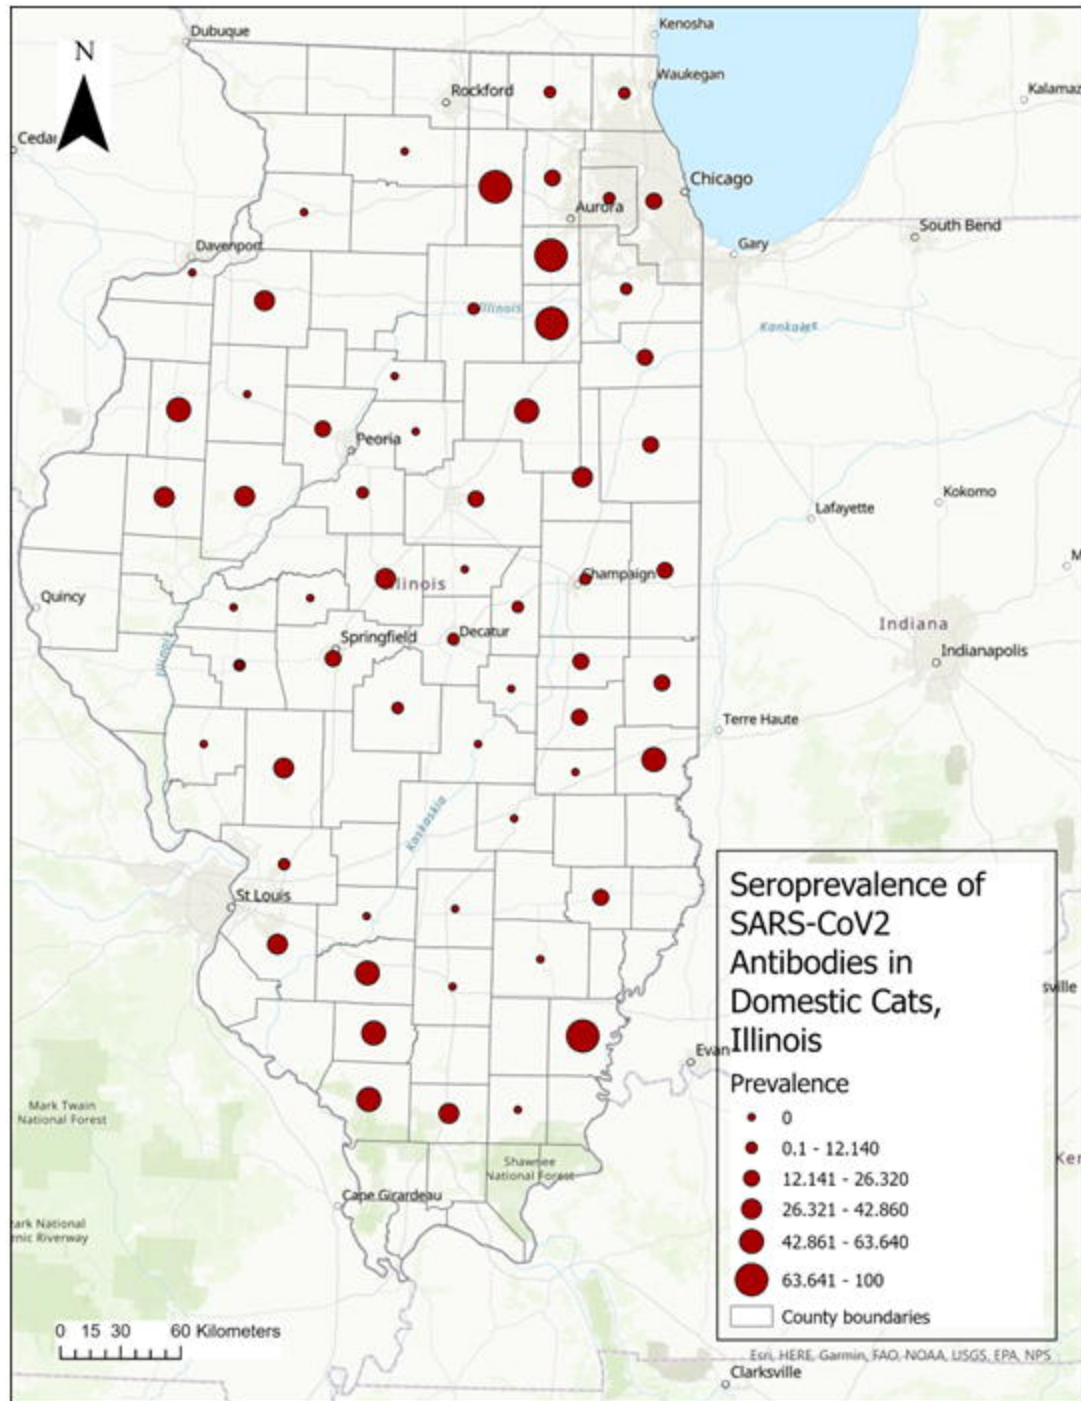

B

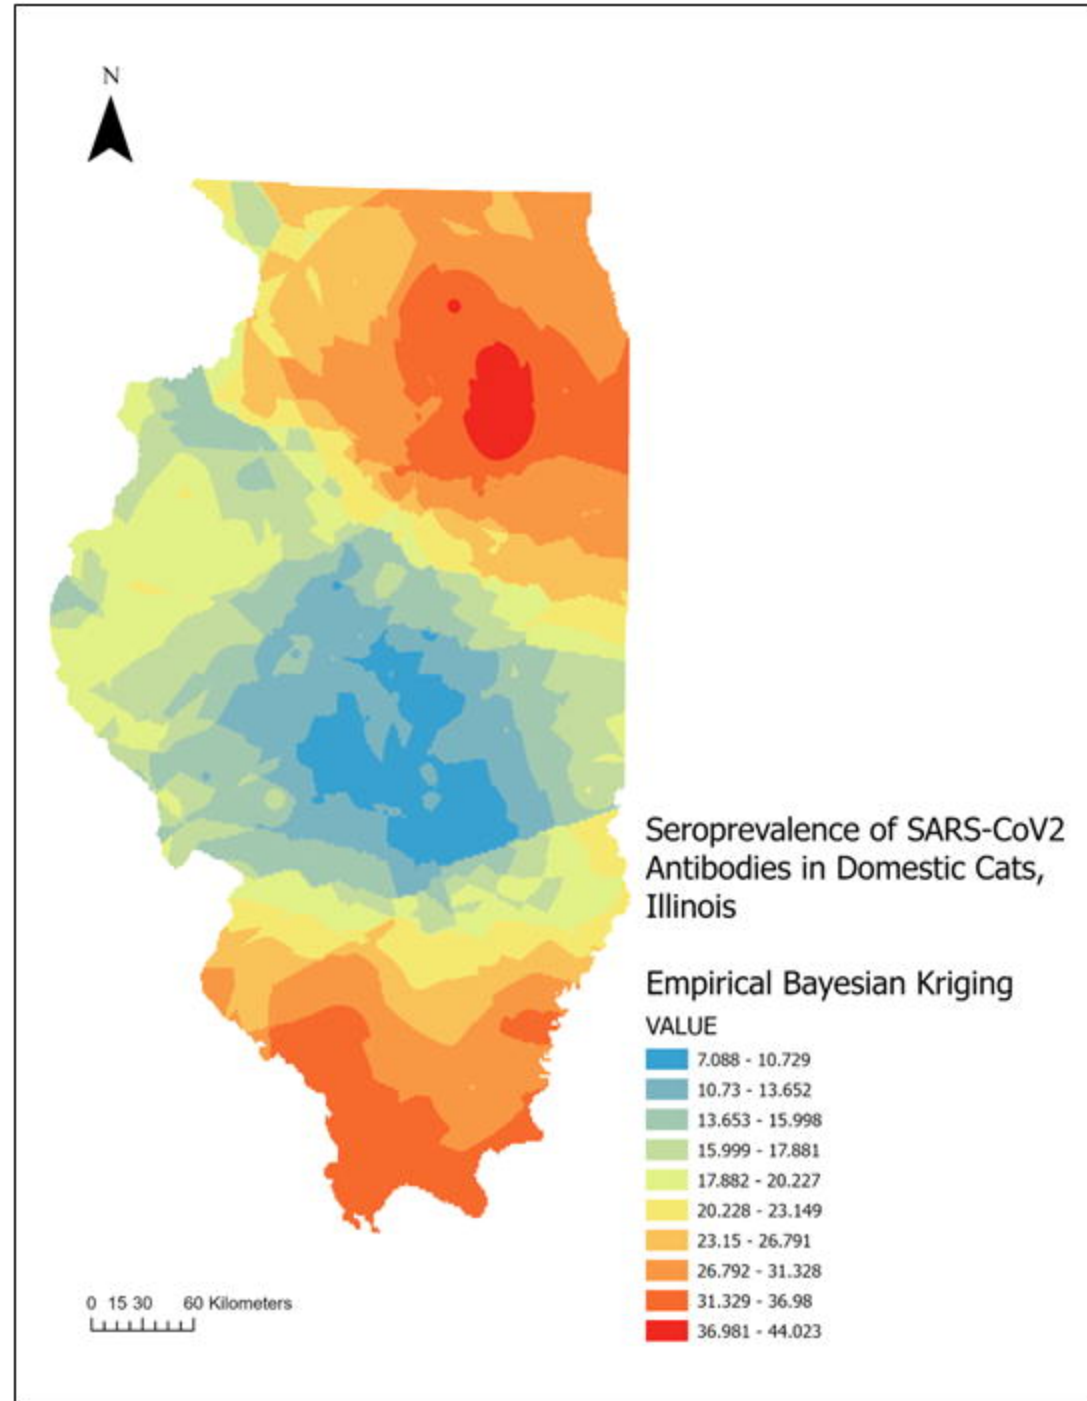

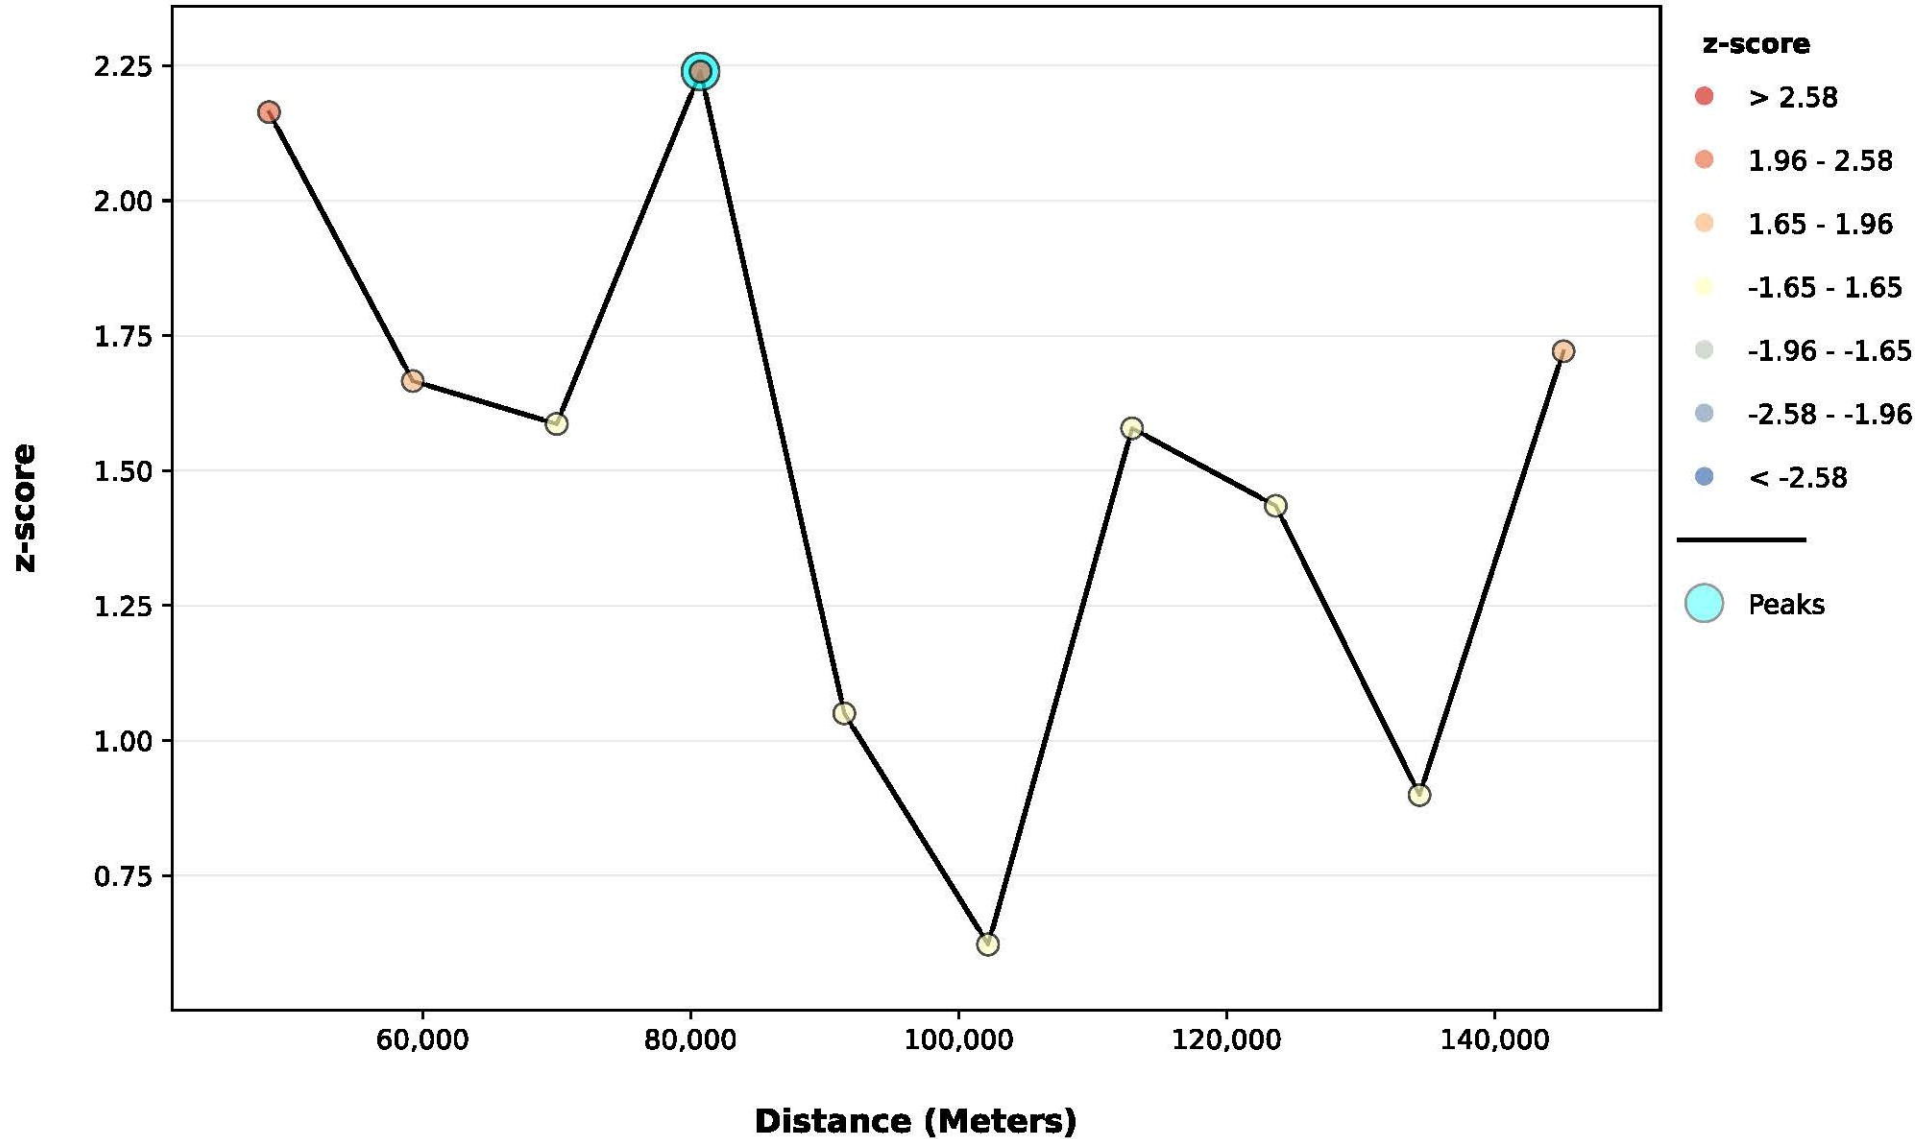

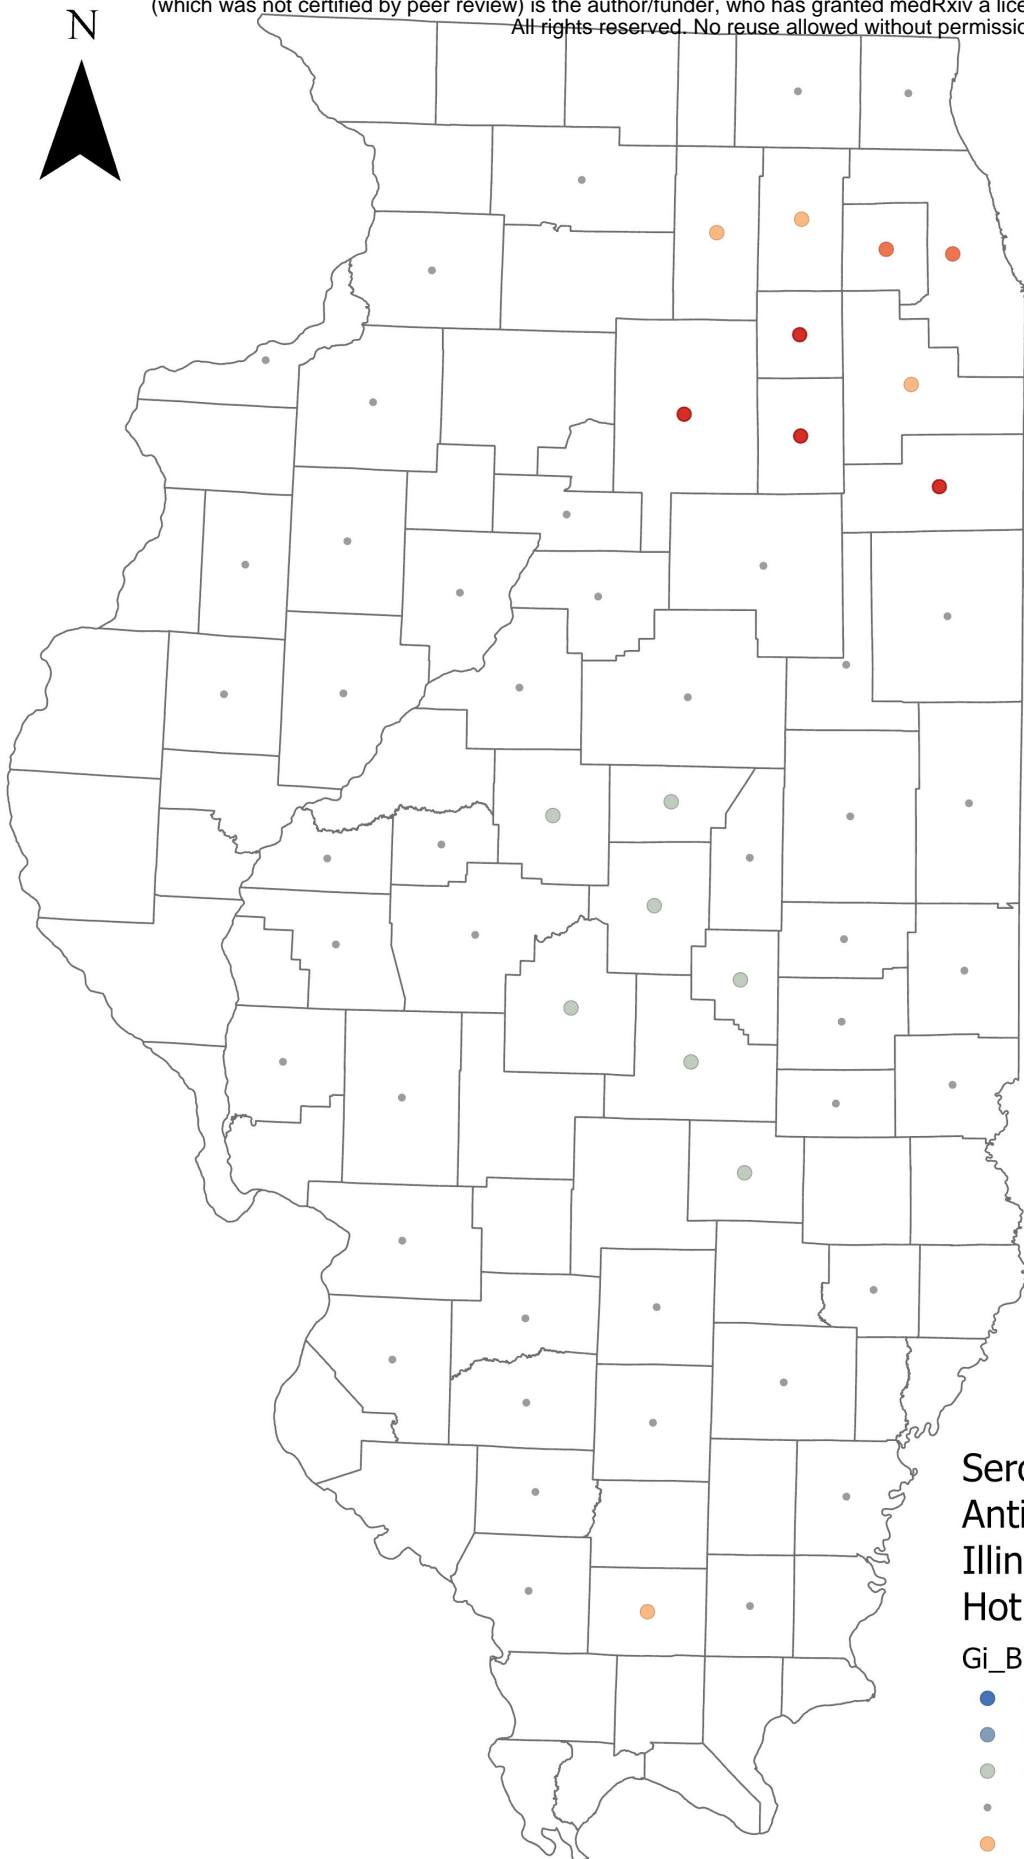

## Seroprevalence of SARS-CoV2 Antibodies in Domestic Cats, Illinois Hot Spot Analysis (Getis-Ord Gi\*)

### Gi\_Bin

- Cold Spot with 99% Confidence
- Cold Spot with 95% Confidence
- Cold Spot with 90% Confidence
- Not Significant
- Hot Spot with 90% Confidence
- Hot Spot with 95% Confidence
- Hot Spot with 99% Confidence

- County boundaries
- County Boundaries

0 12.525 50 Kilometers

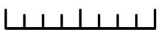

**A**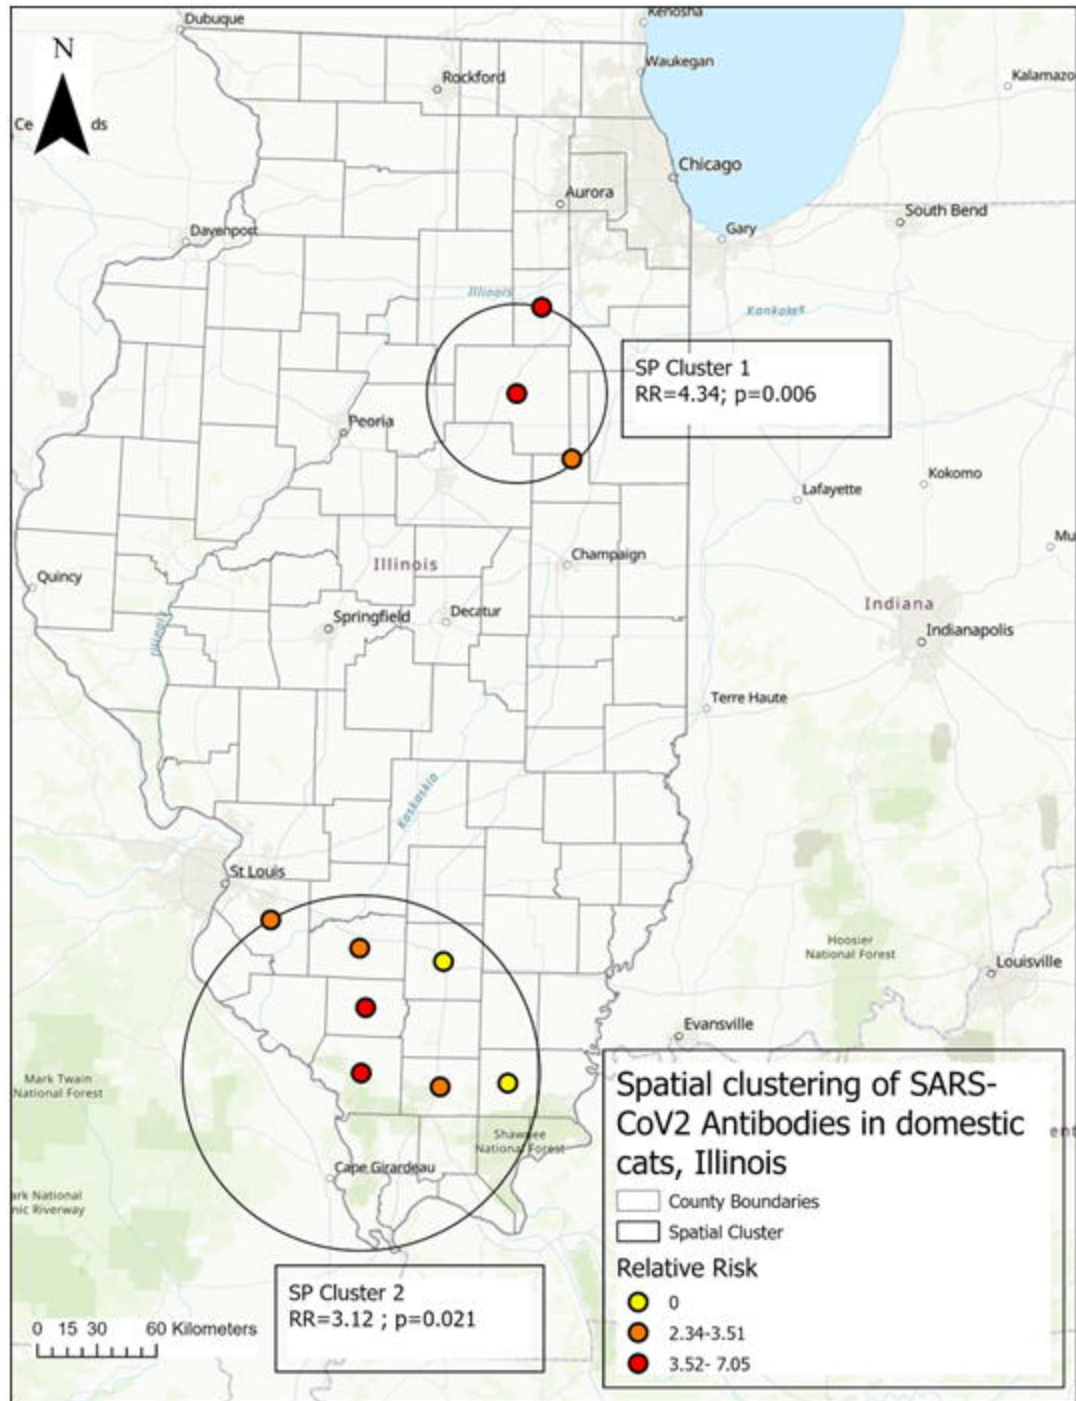**B**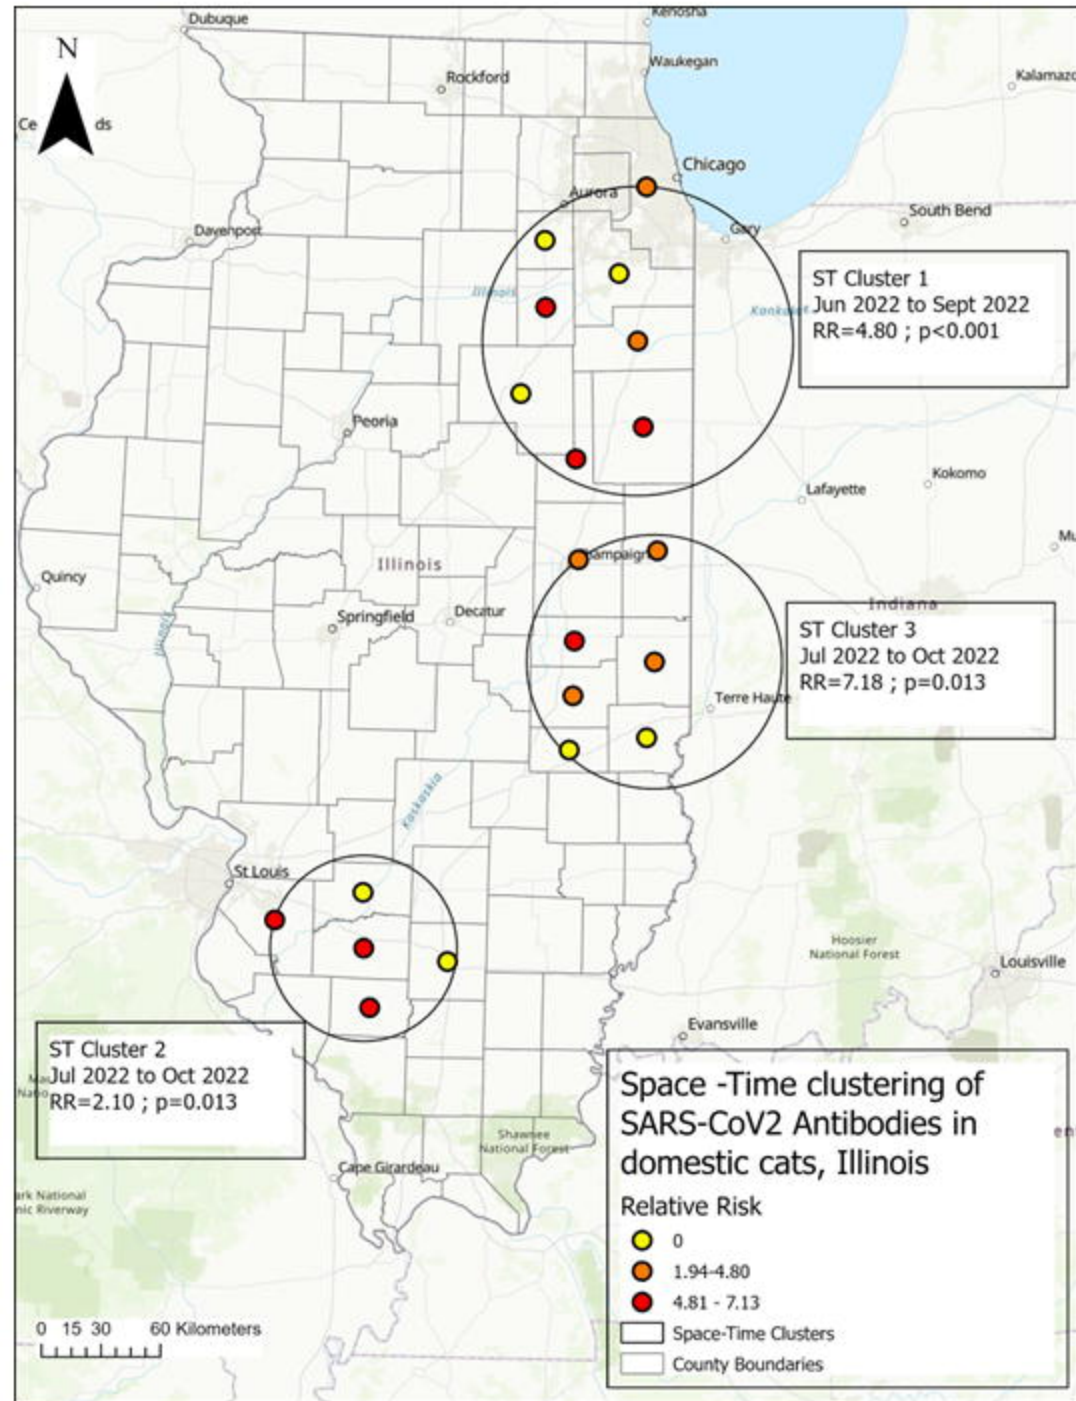

# Illinois

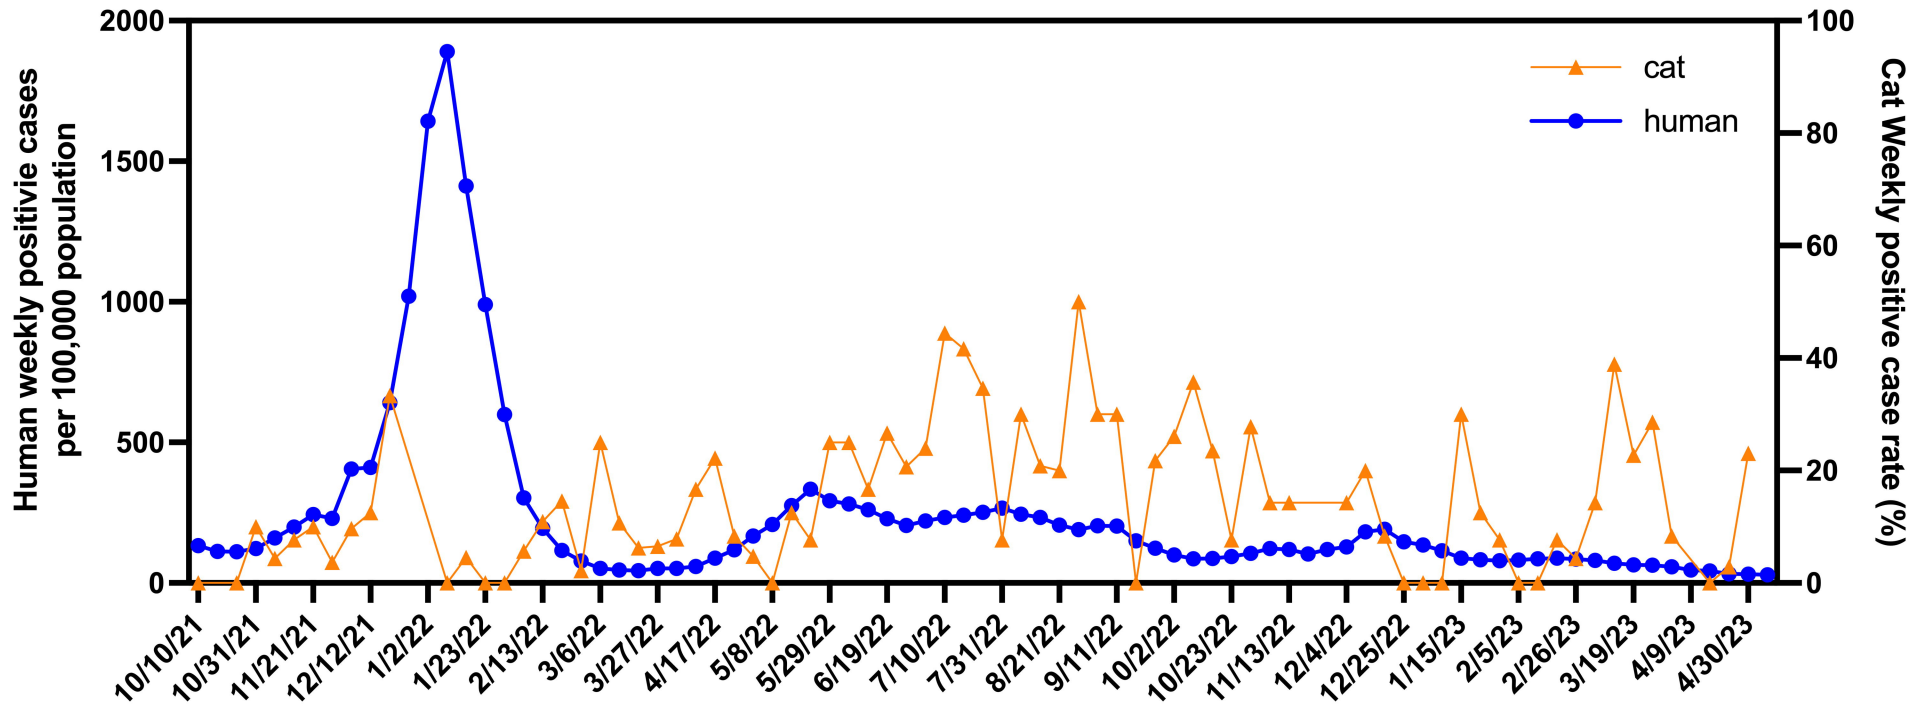

Source: https://medrxiv.org/content/10.1101/2023.06.21.23291564v2.full.pdf
